# Supplementary material for: Development and piloting of a survey to estimate the frequency and nature of potentially harmful preventable problems in primary care from a UK patient’s perspective
Source: PubMed Central journal article supplement (PMC5829776; doi:10.1136/bmjopen-2017-017786), 2018-02-03
Supplement: bmjopen-2017-017786.draft_revisions.pdf [file bmjopen-2017-017786.draft_revisions.pdf]

# BMJ Open

BMJ Open is committed to open peer review. As part of this commitment we make the peer review history of every article we publish publicly available.

When an article is published we post the peer reviewers' comments and the authors' responses online. We also post the versions of the paper that were used during peer review. These are the versions that the peer review comments apply to.

The versions of the paper that follow are the versions that were submitted during the peer review process. They are not the versions of record or the final published versions. They should not be cited or distributed as the published version of this manuscript.

BMJ Open is an open access journal and the full, final, typeset and author-corrected version of record of the manuscript is available on our site with no access controls, subscription charges or pay-per-view fees (<http://bmjopen.bmj.com>).

If you have any questions on BMJ Open's open peer review process please email [editorial.bmjopen@bmj.com](mailto:editorial.bmjopen@bmj.com)

# BMJ Open

## Development and piloting of a survey to estimate the frequency and nature of potentially-harmful preventable problems in primary care from a UK patient's perspective

|                                 |                                                                                                                                                                                                                                                                                                                                                                                                                                                                                                                                                                                                                                                                                                                                                                                                                                                                                                                                                                                           |
|---------------------------------|-------------------------------------------------------------------------------------------------------------------------------------------------------------------------------------------------------------------------------------------------------------------------------------------------------------------------------------------------------------------------------------------------------------------------------------------------------------------------------------------------------------------------------------------------------------------------------------------------------------------------------------------------------------------------------------------------------------------------------------------------------------------------------------------------------------------------------------------------------------------------------------------------------------------------------------------------------------------------------------------|
| Journal:                        | <i>BMJ Open</i>                                                                                                                                                                                                                                                                                                                                                                                                                                                                                                                                                                                                                                                                                                                                                                                                                                                                                                                                                                           |
| Manuscript ID                   | bmjopen-2017-017786                                                                                                                                                                                                                                                                                                                                                                                                                                                                                                                                                                                                                                                                                                                                                                                                                                                                                                                                                                       |
| Article Type:                   | Research                                                                                                                                                                                                                                                                                                                                                                                                                                                                                                                                                                                                                                                                                                                                                                                                                                                                                                                                                                                  |
| Date Submitted by the Author:   | 16-May-2017                                                                                                                                                                                                                                                                                                                                                                                                                                                                                                                                                                                                                                                                                                                                                                                                                                                                                                                                                                               |
| Complete List of Authors:       | Stocks, Susan; University of Manchester, GM Patient Safety Translational Research Centre<br>Donnelly, Ailsa; University of Manchester, PRIMER<br>Esmail, Aneez; University of Manchester, School of Primary Care<br>Beresford, Joanne; Research User Group (RUG) of the NIHR Greater Manchester Primary Care Patient Safety Translational Research Centre<br>Gamble, Carolyn; University of Manchester, GM Patient Safety Translational Research Centre<br>Luty, Sarah; NHS Scotland<br>Deacon, Richard; St Gabriels Medical Centre<br>Danczak, Avril; Central and South Manchester Specialty Training Programme for General Practice<br>Mann, Nicola; University of Manchester, GMPSTRC<br>Townsend, David; University of Manchester, GM Patient Safety Translational Research Centre<br>Ashley, James; Division of Dentistry, School of Medical Sciences, University of Manchester<br>Bowie, Paul; NHS Scotland<br>Campbell, Stephen; University of Manchester, Centre for Primary Care |
| <b>Primary Subject Heading</b>: | Patient-centred medicine                                                                                                                                                                                                                                                                                                                                                                                                                                                                                                                                                                                                                                                                                                                                                                                                                                                                                                                                                                  |
| Secondary Subject Heading:      | Research methods, Patient-centred medicine, General practice / Family practice, Health services research                                                                                                                                                                                                                                                                                                                                                                                                                                                                                                                                                                                                                                                                                                                                                                                                                                                                                  |
| Keywords:                       | STATISTICS & RESEARCH METHODS, PRIMARY CARE, Quality in health care < HEALTH SERVICES ADMINISTRATION & MANAGEMENT                                                                                                                                                                                                                                                                                                                                                                                                                                                                                                                                                                                                                                                                                                                                                                                                                                                                         |
|                                 |                                                                                                                                                                                                                                                                                                                                                                                                                                                                                                                                                                                                                                                                                                                                                                                                                                                                                                                                                                                           |

SCHOLARONE™  
Manuscripts

1  
2  
3 1 Development and piloting of a survey to estimate the frequency and nature of potentially-harmful  
4 2 preventable-problems in primary care from a UK patient's perspective  
5  
6 3

7  
8 4 S Jill Stocks *research fellow*<sup>1</sup>, Ailsa Donnelly *public and patient involvement volunteer*<sup>2</sup>, Aneez Esmail  
9 5 *professor*<sup>1</sup>, Joanne Beresford *public and patient involvement volunteer*<sup>2</sup> Carolyn Gamble *public and*  
10 6 *patient involvement volunteer*<sup>2</sup>, Sarah Luty *general practitioner*<sup>3</sup>, Richard Deacon *general*  
11 7 *practitioner*<sup>4</sup>, Avril Danczak *general practitioner*<sup>5</sup>, Nicola Mann *general practitioner*<sup>2</sup>, David Townsend  
12 8 *general practitioner*<sup>2</sup>, James Ashley *dentist*<sup>6</sup>, Paul Bowie *programme director*<sup>7,8</sup>, Stephen M Campbell  
13 9 *professor*<sup>1</sup>

14  
15  
16  
17 10  
18 11 1. NIHR Greater Manchester Primary Care Patient Safety Translational Research Centre, Centre for  
19 12 Primary Care, Division of Population Health, Health Services Research and Primary Care, University  
20 13 of Manchester, Manchester M13 9PL, UK

21 14 2. Research User Group (RUG) of the NIHR Greater Manchester Primary Care Patient Safety  
22 15 Translational Research Centre, Centre for Primary Care, Division of Population Health, Health  
23 16 Services Research and Primary Care, University of Manchester, Manchester M13 9PL, UK

24 17 3. General Practitioner NHS Greater Glasgow and Clyde, Medical Directorate, NHS Education for  
25 18 Scotland, Glasgow G3 8BW

26 19 4. St Gabriels Medical Centre, 4, Bishops Road, Prestwich, Manchester M25 0HT, UK

27 20 5. Central and South Manchester Specialty Training Programme for General Practice, Health  
28 21 Education England North West ( HEENWE) Education and Research Centre, Wythenshawe Hospital,  
29 22 Manchester M23 9LT, UK

30 23 6. Division of Dentistry, School of Medical Sciences, University of Manchester, Manchester M13 9PL,  
31 24 UK

32 25 7. Medical Directorate, NHS Education for Scotland, 2 Central Quay, Glasgow G3 8BW, UK.

33 26 8. Institute of Health and Wellbeing, University of Glasgow, Glasgow G12 0XH, UK  
34 27  
35 28  
36 29

37  
38  
39 30 Correspondence to [jill.stocks@manchester.ac.uk](mailto:jill.stocks@manchester.ac.uk)  
40 31

41 32 Word count: 3333  
42 33  
43 34  
44  
45  
46  
47  
48  
49  
50  
51  
52  
53  
54  
55  
56  
57  
58  
59  
60

## 1 Abstract

2 **Objectives:** To design and pilot a survey to be used at the population level to estimate the frequency  
3 of patient-perceived potentially-harmful preventable-problems occurring in UK primary care. To  
4 explore the nature of the problems, patient-suggested strategies for prevention and opinions of  
5 clinicians and the public regarding the potential for harm

6 **Design:** a survey was co-designed by three members of the public and one researcher and piloted  
7 through public and patient involvement and engagement networks

8 **Setting:** self-selected sample of the UK population

9 **Participants:** 977 members of the public accessed the online survey during October and November  
10 2015

11 **Primary outcome measures:** respondent feedback about the ease of completion of the survey,  
12 quality of responses in terms of review by clinicians and members of the public, preliminary  
13 estimates of the frequency and nature of patient-perceived potentially-harmful problems occurring  
14 in the last 12 months

15 **Results:** 638 members of the public completed the survey (65% response rate) and few respondents  
16 reported any difficulty in understanding or completing the survey. 132 (21%) respondents reported  
17 experiencing a potentially-harmful preventable-problem during the past 12 months and 108 (82%) of  
18 these provided adequate information for at least one clinician to estimate the likelihood the  
19 respondent described a potentially-harmful problem. Respondents were older than the UK  
20 generally, more likely to work or volunteer in the healthcare sector and tended to use primary care  
21 more frequently but their trust and confidence in their GP was similar to that of the UK population  
22 as measured by the annual population level GP patient survey.

23 **Conclusions:** the survey was acceptable to patients and mostly provided data of sufficient quality for  
24 review by clinicians and members of the public. It is now ready to use at a population level to  
25 estimate the frequency and nature of potentially-harmful preventable-problems in primary care  
26 from a patient's perspective.

### 27 Strengths and limitations of this study

- 28 • We have designed and tested a survey to measure the frequency and nature of potentially-harmful preventable-problems in primary care from the patient's perspective
- 29 • The survey was co-designed by three members of the public and piloted through extensive public and patient involvement
- 30 • The patient-described scenarios were reviewed by primary care clinicians
- 31 • The study respondents were self-selected through public and patient involvement and engagement groups
- 32 • The survey is ready to be administered to a representative sample of the general population

## 1 Background

2  
3  
4  
5  
6  
7  
8  
9  
10  
11  
12  
13  
14  
15  
16  
17  
18  
19  
20  
21  
22  
23  
24  
25  
26  
27  
28  
29  
30  
31  
32  
33  
34  
35  
36  
37  
38  
39  
40  
41  
42  
43  
44  
45  
46  
47  
48  
49  
50  
51  
52  
53  
54  
55  
56  
57  
58  
59  
60

1 Patients are thought to take a different view of patient safety to healthcare professionals. (1) They  
2 tend to view safety in terms of the overall balance of benefit and harm over time whereas  
3 healthcare professionals often see high quality healthcare occasionally punctuated by safety  
4 incidents and adverse events.(2) Furthermore patients may different opinions about how to improve  
5 patient safety.(3, 4) or different priorities to clinicians, for example identifying psychological and  
6 emotional harm rather than technical errors.(5) Involving patients in identifying errors and reducing  
7 harm occurs in secondary care (6) but patient reported outcomes can show poor concordance  
8 between patients and clinicians, for example, in reporting adverse symptom events in the context of  
9 drug safety.(7) Nonetheless patients are thought to be capable of reporting medical errors  
10 accurately. (6, 8) Involving patients is advocated as a way to improve safety (9) and this approach  
11 would be facilitated through patients and professionals understanding each other's expectations  
12 and priorities.

13  
14  
15  
16  
17  
18  
19  
20  
21  
22  
23  
24  
25  
26  
27  
28  
29  
30  
31  
32  
33  
34  
35  
36  
37  
38  
39  
40  
41  
42  
43  
44  
45  
46  
47  
48  
49  
50  
51  
52  
53  
54  
55  
56  
57  
58  
59  
60

16 Studies that quantify patient safety problems in primary care are uncommon and incidence  
17 estimates range from less than 1 to 24 per 100 consultations or record review.(10-12) The National  
18 Reporting and Learning System (NRLS) in England and Wales records just 1% of reports as originating  
19 in primary care (13) that likely reflects under-reporting.(14, 15) Still fewer studies have quantified  
20 patient safety problems in primary care from the patient's perspective. (16) A 2013 European survey  
21 reported that 43% of UK respondents felt that it was "likely" that patients could be harmed by non-  
22 hospital healthcare, an increase from 37% in 2009.(17) In Norway the patient-reported lifetime  
23 probability of ever experiencing an adverse event was 10%, of which around two thirds of  
24 respondents attributed the cause of their event as their general practitioner (GP).(4) In Spain it was  
25 estimated that around 7% of patients experienced an adverse event during a 1 year period. (18) A  
26 USA practice-based website observed an incidence rate of safety events of 1.4% over 2 years.(19)  
27 Data from the UK is sparse; this may be partly due to the lack of a valid and reliable instrument to  
28 make a comprehensive measurement of safety in primary care.(20) The PREOS-PC should help to  
29 address this knowledge gap.(21, 22)

30  
31  
32  
33  
34  
35  
36  
37  
38  
39  
40  
41  
42  
43  
44  
45  
46  
47  
48  
49  
50  
51  
52  
53  
54  
55  
56  
57  
58  
59  
60

31 We aimed to design and pilot a survey to be used at the population level to estimate the frequency  
32 of patient-perceived potentially-harmful preventable-problems occurring in UK primary care. We  
33 relied on public and patient involvement (PPI) from the outset in order to ensure that our survey was  
34 easily understood by the public. We also aimed to explore the nature of the problems, patient-  
35 suggested strategies for prevention and differences in opinion between primary care clinicians and  
36 the public regarding the potential for harm in the patient-described scenarios. The study was  
37 conceived, designed and implemented by a team of three members of the public and one  
38 researcher. Primary care professionals provided their opinions after collection of the data. The  
39 specific aims of the study were to:

- 40
- 41 1. co-design and pilot a survey asking about problems occurring in primary care that caused, or had
- 42 the potential to cause, preventable harm as perceived by patients using PPI.
- 43 2. describe the type of patient-perceived problems reported, describe the demographics of the
- 44 patients reporting a problem, the primary care service involved, with whom in the primary care

1 service the problem was discussed (if it was) and patient suggestions as to how it might have been  
2 prevented.

3 3. compare the opinions of the reporting patient, members of the public and clinicians as to the  
4 likelihood the scenario described was a potentially-harmful preventable-problem.

## 5 6 Methods

### 7 8 Designing and piloting of the survey

9 Our aim was to design a survey asking about problems occurring in primary care that caused, or had  
10 the potential to cause, preventable harm as perceived by patients that was easily understood and  
11 free from jargon. Currently there is no well-established terminology for asking such a question.(8)  
12 The process began with a discussion between three members of the public (AD, JB, CG) who were  
13 members of the public and patient involvement (PPI) group of the Greater Manchester Primary Care  
14 Patient Safety Translational Research Centre Research User Group (23)(GMPSTRC RUG, see Appendix  
15 1 for more details) and one academic researcher (SJS). Questions used in previous surveys  
16 addressing a similar question (4, 17-19) were shared among the project team and used to generate  
17 several candidate questions. These questions were then discussed privately among the project  
18 team's friends and family and within the project team (SJS, AD, JB, CG). The discussion was  
19 facilitated by making the candidate questions available online. After two iterations of this process  
20 the survey (online Appendix 1, Box 1) was piloted online through newsletters or group mailings of  
21 several PPI and public engagement networks during November and December 2015. These networks  
22 were the associate GMPSTRC RUG, the Public Programmes team at Central Manchester Foundation  
23 Trust, the Citizen Scientist project, the Primary Care Research in Manchester Engagement Resource,  
24 North West People in Research Forum and HelpBeatDiabetes volunteers. (Details of these groups  
25 and networks is in online Appendix 1.)

26  
27 The first question (Q1 Box 1) was taken from the English GP patient survey in order to compare the  
28 overall level of confidence and trust in their GP among the survey respondents with that across  
29 England.(24) The second question (Q2 Box 1) is the main screening question, those responding  
30 negatively to Q2 (*i.e.* not experienced a preventable-problem) were directed to a more specific  
31 question with a list of commonly understood patient safety events (online Appendix 1). If this  
32 prompted recognition of experiencing a potentially-harmful preventable-problem they were  
33 returned to Q4 (Box1). The rationale behind this approach was that the screening question (Q2 Box  
34 1) should be non-leading and encourage the respondents to describe their preventable-problems  
35 through the subsequent questions without the suggestion that inevitably occurs following a list of  
36 possible potentially-harmful preventable-problems. However if the respondent did not believe that  
37 they had experienced a potentially-harmful preventable-problem then the prompt question (Q10,  
38 Box 1) would ensure that this was the case and also test the sensitivity of Q2 (Box 1). The option to  
39 answer on behalf of a friend or relative was offered to those who had not a personal experience to  
40 report. This was to ensure sufficient responses to adequately test the questionnaire but also to  
41 discourage respondents from answering with another person's experience as their own.  
42 Respondents were also asked whether they worked or volunteered in the healthcare profession and  
43 to comment on the ease of completion of the questionnaire.

### 44 45 Coding of reported events

46  
47  
48  
49  
50  
51  
52  
53  
54  
55  
56  
57  
58  
59  
60  
4

### Type of problem

The nature of the problem in each described scenario was coded at face value, *i.e.* as the patient described without further interpretation, by one author (SJS) and checked by a second author (JA for dental scenarios, PB for all other scenarios). A bottom-up (inductive) approach was used to identify similar topics which were coded then cross-matched to an existing taxonomy for errors in general practice (25, 26) (Table A, online Appendix 2). All the new codes matched the existing taxonomy within the higher two levels and the medication-related scenarios were coded to a finer level (Table B, online Appendix 2).

### Likelihood the scenario described a potentially-harmful preventable-problem

Five GPs, one dentist and seven members of the public estimated the likelihood that, in their opinion, each patient-described scenario was a potentially-harmful preventable-problem. Brief biographies of the coders are provided in online Appendix 1. Some examples of the information provided to the coders are shown in online Appendix 2 and consisted of the responses to Q5 to Q9 (Box 1). They were not given any demographic information or the patient's estimate of the impact on their health (Q4, Box 1). Coders were asked to score each scenario from very likely (5) to definitely not (1) in response to the question "*How likely is it that the patient was correct in thinking that their health might be worsened, or actually was made worse, because of the preventable problem described below?*" Coders could also respond "insufficient information", "Don't know" and give free text feedback (Table C, Appendix 2). The clinician scores were used to categorise the scenarios in to groups with higher or lower estimated likelihoods that they were a potentially-harmful preventable-problem as below.

- Higher threshold - Median score of 5 ("very likely or certain") or 4 ("probably") or at least one score of 5 ("very likely or certain")
- Lower threshold - Median score of 3 ("possibly") or at least one score of 4 ("probably" or higher)
- All other scenarios – Median score below 3 ("possibly") and zero scores above 3 ("possibly")

### Statistical analysis

Simple cross tabulations were used to describe the data and a binary logistic regression model was used to explore whether particular types of patient were more likely to perceive a potentially-harmful preventable-problems *e.g.* by demographics or their opinions. Comparisons between demographics and outcomes for the respondents and the UK (or England) population were made using a  $\chi^2$  test. All analyses were done using Stata 14.

### Public and Patient Involvement (PPI)

PPI was central to this co-design study and was provided through the GMPSTRC RUG (23) and other PPI networks (online Appendix 1). The study was conceived, designed, implemented and analysed by a team of three members of the public (AD, CG, JB) and one researcher (SJS). At the outset the researcher presented the existing literature on this topic to the PPI members of the research team who then co-designed the first draft of the survey which was tested through the PPI members' personal contacts. The piloting of the survey was through existing PPI networks as listed in online Appendix 1. The scoring of the questions as to the likelihood they described a potentially-harmful preventable-problem was undertaken by 7 members of the public, 2 of whom had no previous

1 experience in PPI (as well as 5 GPs and 1 dentist as described in online Appendix 1). These findings  
2 will be disseminated to all the PPI groups that contributed to the pilot study and the authors will  
3 forward these results to their personal contacts who contributed to the questionnaire design.

4  
5 Ethical approval was granted by the University of Manchester Ethics Committee 2 (Approval 15372).

## 6 Results

7 In total 977 members of the public accessed the online pilot survey and 638 (65%) completed the  
8 survey during October and November 2015. Flow charts of the participants through the survey are  
9 shown in Figures A&B, online Appendix 1. In total 223/638 (35%) of respondents reported ever  
10 experiencing a potentially-harmful preventable-problem in primary care of which 132 occurred  
11 within the past 12 months (21%, Fig A, online Appendix 1) and 62 (10%) of these came required  
12 prompting through question 10 (Box 1 and Fig A, online Appendix 1). A further 18 potentially-  
13 harmful preventable-problems involving friends or relatives where the respondent was present and  
14 occurred in the last 12 months were reported 13/418 (3%, Fig B, online Appendix 1). The majority of  
15 respondents (592, 93%) had confidence and trust in the GP seen at their last appointment similar to  
16 the 2016 England proportion of 92% (Q1, Box1 & Table 1). Demographic information was not  
17 provided by 83 (13%) respondents, possibly due to lack of clarity about the end of the survey since  
18 they completed all other questions. Respondents were older than the UK generally, more likely to  
19 work or volunteer in the healthcare sector and tended to use primary care more frequently (Table  
20 1).

21 The majority of respondents were recruited through the HelpBeatDiabetes group (533, 84%, online  
22 Appendix 1). Over 250 respondents provided free text feedback on the survey, 200 comments  
23 reported that the questionnaire was easy to complete and understand and just one comment  
24 described the survey as complex. Most of the remaining comments expressed the desire to be able  
25 to provide more information, *e.g.* more than one event or report for a relative or as a carer  
26 (reporting on behalf of another person was excluded for events occurring more than 12 months ago)  
27 and 13 comments actually provided this unrequested information. A few respondents found it  
28 difficult to find a suitable option to describe their pattern of use of primary care or their role as a  
29 worker or volunteer in healthcare.

30 The high completion rate and positive free text feedback suggested that respondents found the  
31 questionnaire easy to complete. Furthermore nobody used the "Do not understand the question"  
32 option as their response to Q2 Box1. There was a high response from healthcare professionals or  
33 volunteers (30% of respondents compared to approximately 3% of the UK adult population, Table 1)  
34 but they were no more likely to report a preventable problem than non-healthcare  
35 workers/volunteers (35%,  $P\chi^2=0.28$ ). However the scenarios described by healthcare professionals or  
36 volunteers were significantly more likely to be categorised as a potentially-harmful preventable-  
37 problem following to clinician review using both the higher (9% vs 16%,  $P\chi^2=0.01$ ) and lower  
38 threshold (2% vs 6%,  $P\chi^2=0.004$ ).

## 39 Likelihood the scenario described a potentially-harmful preventable-problem

40 Generally the members of the public assigned a higher probability to the likelihood that the patient-  
41 described scenario was a potentially-harmful preventable-problem compared with GPs (Fig 1, Table



2). In 89/108 (82%) scenarios the median score for the PPI researchers was higher than for the clinicians and for 38 (35%) scenarios the PPI median score was 2 or more points higher in a 5 point scale. Following clinician review 3% of the patient-reported scenarios occurring in the last 12 months were categorised as “probably” a potentially-unsafe preventable-problem and 11% as “possibly” (Table 2). Examples of the patient-reported scenarios with higher clinician rankings and those with greatest disagreement between members of the public and clinicians are shown in online Appendix 2.

#### The nature of the potentially-harmful preventable-problems

The types of patient-reported scenarios and their categorisation following clinician review are shown in Figure 2. Medication-related problems were most frequently reported type of problem and also were ranked as more likely to be a potentially-harmful problem by clinicians. Information about the patient’s response to the potentially-harmful preventable-problem and the primary care service involved is provided in Table 4. The majority of potentially-harmful preventable-problems in the past 12 months occurred in general practice (73%, Table 4) and pharmacy (5%, Table 4). Around half the respondents had not discussed their problem with anybody working in primary care (51%, Table 4). The most common reasons for not discussing the problem were being unable to find a primary care professional with whom to discuss the problem (31%, Table 4) or they did not feel comfortable with discussing their concerns (24%, Table 4) The patient suggestions for ways to prevent the problem from happening are summarised in Table 5. The most frequently occurring suggestions were that clinicians should involve the patient more fully in the healthcare process (*i.e.* listen to the patient and trust their judgement more) and be up to date with, and apply, the most recent information about the patient’s condition (*i.e.* take in to account all of the patient’s information - their medical history and results and letters).

#### Discussion

We have designed and tested a survey to measure the frequency of occurrence of potentially-harmful preventable-problems in primary care and found it to be well understood by patients. The survey is acceptable to patients based on the high completion rate and positive feedback. Furthermore none of the respondents indicated that they did not understand the screening question (Q2, Box1). The open-ended questions (Q6 to Q9, Box 1) led to patient-described scenarios that mapped well to an existing taxonomy designed and used by clinicians and researchers.(25, 26) This implies agreement between clinicians, researchers and patients in identifying the characteristics of a potentially-harmful problem. Furthermore, using a non-leading screening question (Q2, Box 1) to ensure that any problems unique to the patient perspective were identified did not find additional types of problem. Members of the public, however, ranked the scenarios as being more likely to describe a potentially-harmful preventable-problem compared with clinicians (Fig 1).

#### Strengths and weaknesses of the study

We believe that our survey captures the true patient perspective due to the involvement of members of the public as research partners through data acquisition to analysis and reporting in a co-designed study. By the use of a simple non-leading screening question we encouraged respondents to express their own perspective on what constituted a potentially-harmful

1 preventable-problem rather than directing them towards existing definitions. To ensure that we did  
2 not miss any problems we followed up with a prompt that encouraged respondents to think in terms  
3 of the traditional view of patient safety problems. Furthermore our survey goes further than  
4 describing and counting the frequency of occurrence of potentially-harmful preventable-problems  
5 and provides information about how patients dealt with the problem and how it could have been  
6 prevented that offers insight in to ways to reduce the frequency of their occurrence. The absence of  
7 a link between practices and the patients allows for responses that might not occur if this survey  
8 were administered through the individual's practice. The main weakness of the study is the self-  
9 selection of the respondents who were older and tended to use primary care more frequently. More  
10 frequent users of primary care were more likely to report a problem but age was not associated with  
11 the likelihood of reporting a problem. Our bench marking question (Q1, Box1) showed that the  
12 respondents were similar to the English GP patient survey(24) in terms of their level of trust and  
13 confidence in their GP and not a group with a more negative attitude towards primary care as might  
14 have happened given the nature of the survey.

#### 15 Strengths and weaknesses in relation to other studies

16 Our finding that 35% of respondents perceived that they had experienced a potentially-harmful  
17 problem in in their lifetime is consistent with a European survey (43% of UK respondents felt that it  
18 was "likely" that patients could be harmed by non-hospital healthcare).(17) This study offers some  
19 insight in to the type of concerns that might underlie this apparent lack of confidence in primary  
20 care. A face to face interview in family practice waiting rooms in the USA reported that 16% of  
21 respondents believed a physician had made a mistake in their care.(27) The types of problem and  
22 patient responses to the problem are similar to those that have been described qualitatively (1, 22)  
23 but we have taken this a step further by quantifying the frequency of occurrence and other  
24 descriptors of the problem from the patient's perspective. In this small study we did not find that  
25 patients were particularly likely to attribute blame to individual members of staff as has been  
26 observed previously (3, 4), perhaps partly due to the high proportion of respondents working or  
27 volunteering in healthcare.

#### 28 Unanswered questions and future research

29 Our finding that 21% of respondents perceived that they had experienced a potentially-harmful  
30 problem in the last 12 months, and the corresponding proportion following clinician review of 3%  
31 (higher threshold) to 11% (lower threshold) may well reflect the self-selected nature of the study  
32 population and needs to be validated in a large population level survey. We anticipate that a  
33 population level survey would be fruitful since this approach yielded a number of patient-described  
34 scenarios that were amenable to further analysis including coding by clinicians. The high response to  
35 this pilot survey by healthcare professionals coupled with the likelihood that they provided better  
36 information, given the higher ranking given by clinicians to scenarios originating from healthcare  
37 professionals, points towards an opportunity. Healthcare professionals are an educated and  
38 accessible group who could provide a valuable resource for learning about preventable-problems in  
39 primary care. This survey could be used to ask NHS staff anonymously about their *personal*  
40 *experiences, as a patient*, of potentially-harmful preventable-problems in primary care. Of course  
41 complete anonymity for responders would need to be guaranteed and any identifying aspects in  
42 their reported scenarios would have to be removed. It would be very different to whistle-blowing,  
43  
44  
45

1  
2  
3 1 respondents would feed back on the care they received personally rather make observations on  
4 2 their own colleagues practice. The aim would be to anonymously describe and monitor problems  
5 3 over time through individuals with the expectations of a patient who also had an understanding of  
6 4 the healthcare system.  
7  
8

9 5  
10 6 Acknowledgements: The authors would like to express their thanks and appreciation for the work  
11 7 done by the Mary Aldred, Gitanjali Holt, Manoj Mistry, Carole Bennett and Lindsey Brown in coding  
12 8 the patient-described scenarios.  
13 9

14 10 This work was supported by the NIHR grant number gmpstrc-2012-1  
15 11

16 12 Funding: This study was funded by the National Institute for Health Research  
17 13 (<http://www.nihr.ac.uk>) through the Greater Manchester Primary Care Patient Safety Translational  
18 14 Research Centre (NIHR GM PSTRC), grant number gmpstrc-2012-1. The views expressed are those of  
19 15 the author(s) and not necessarily those of the NHS, the NIHR or the Department of Health. The  
20 16 funders had no role in study design, data collection and analysis, decision to publish, or preparation  
21 17 of the manuscript.  
22  
23

24 18 Competing interests: All authors have completed the ICMJE uniform disclosure form at  
25 19 [www.icmje.org/coi\\_disclosure.pdf](http://www.icmje.org/coi_disclosure.pdf) (available on request from the corresponding author) and declare  
26 20 no support from any organisation for the submitted work; no financial relationships with any  
27 21 organisations that might have an interest in the submitted work in the previous three years, no  
28 22 other relationships or activities that could appear to have influenced the submitted work.  
29  
30  
31

32 23 Copyright statement: the Corresponding Author has the right to grant on behalf of all authors and  
33 24 does grant on behalf of all authors, an exclusive licence on a worldwide basis to the BMJ Publishing  
34 25 Group Ltd to permit this article (if accepted) to be published in BMJ editions and any other BMJPL  
35 26 products and sublicences such use and exploit all subsidiary rights, as set out in our licence.  
36  
37

38 27 Contributors: SJS, AD, JB and CG conceived and designed the study. SJS, AD, JB, CG, AE, PB, JA, DT,  
39 28 SL, AD, RD and NM analysed the data. SJS wrote the manuscript, and is guarantor. AD, JB, CG, AE, PB,  
40 29 JA, DT, SL, AD, RD, NM and SC edited the manuscript.  
41

42 30 Data sharing: Raw data (coded only) is available from [jill.stocks@manchester.ac.uk](mailto:jill.stocks@manchester.ac.uk)

43 31 Ethics approval: University of Manchester Ethics Committee 2 (Approval 15372)  
44

45 32 Figure legends

46 33 Figure 1. Median estimates as to the likelihood that the patient describes a potentially-harmful  
47 34 preventable-problem occurring in the last 12 months by six clinicians and seven members of the  
48 35 public  
49  
50

51 36 Footnote to Figure 2: See Appendix 2 for details of coding; A coded to 2 levels, B coded to 1 level, C  
52 37 medication problems coded to 3 levels  
53

54 38 Fig 2. Numbers of patient-perceived problems occurring in the last 12 months categorised according  
55 39 to the patient's description with clinician ranking as to the likelihood it is a potentially-harmful  
56 40 preventable problem (Table 2).  
57  
58  
59  
60

1

Box 1. Brief summary of questionnaire – see online appendix 1 for full version of survey.

Q1. Did you have confidence and trust in the GP you saw or spoke to at your last appointment?  
(benchmarking question)

Q2. When using primary care have you ever felt concerned that your health might be worsened, or actually was made worse, because of a mistake or a problem that could have been prevented?

If yes to Q2

Q3. How long ago did the mistake or preventable problem happen?

Q4. How did this affect your health?

Q5. Which primary care service were you using when the mistake or preventable problem occurred?

Q6. Briefly describe the mistake or problem and how it happened

Q7. Could the mistake or problem have been avoided? If so how?

Q8. Were you able to talk about the mistake or problem with anybody working in the primary care service? If not –why not?

Q9. If you discussed the mistake or problem with somebody working in primary care please describe their job or role

Q10. In the list below are some examples of **preventable** problems<sup>1</sup> that might happen when using primary care. Has ***anything similar*** happened to you ***in the last 12 months***? If yes go to Q4

<sup>1</sup>See online appendix 1 for list of preventable problems

2

3

4

10

1 Table 1. Characteristics of survey respondents

| Variable                               | All respondents<br>n=638 | Ever had problem<br>n=223 | Had problem<br>in last 12<br>months<br>n=132 | UK population<br>comparator            |
|----------------------------------------|--------------------------|---------------------------|----------------------------------------------|----------------------------------------|
| GP satisfaction                        | missing=0                | missing=0                 | missing=0                                    | GP patient survey(24)                  |
| Yes definitely                         | 384 (60%)                | 81 (36%)                  | 55 (42%)                                     | 64%                                    |
| Yes, to some extent                    | 208 (33%)                | 110 (49%)                 | 52 (39%)                                     | 28%                                    |
| No, not at all                         | 39 (6%)                  | 27 (12%)                  | 21 (16%)                                     | 4%                                     |
| Don't know / can't say                 | 7 (1%)                   | 5 (2%)                    | 4 (3%)                                       | 3%                                     |
| Worked or volunteered in<br>healthcare | missing=92               | missing=40                | missing=19                                   | NHS workforce <sup>1</sup>             |
| Yes                                    | 166 (30%)                | 64 (35%)                  | 41 (36%)                                     | 3%                                     |
| Gender                                 | missing=87               | missing=38                | missing=16                                   | ONS mid-2015<br>estimates <sup>2</sup> |
| Female                                 | 268 (49%)                | 106 (57%)                 | 63 (54%)                                     | 51%                                    |
| Age                                    | missing=85               | missing=37                | missing=15                                   | ONS mid-2015<br>estimates <sup>2</sup> |
| 16 to 34 years                         | 42 (8%)                  | 22 (12%)                  | 11 (9%)                                      | 31%                                    |
| 35 to 54 years                         | 143 (26%)                | 54 (29%)                  | 34 (29%)                                     | 34%                                    |
| 55 to 64 years                         | 162 (29%)                | 59 (32%)                  | 31 (27%)                                     | 14%                                    |
| 65 to 74 years                         | 170 (31%)                | 44 (24%)                  | 32 (27%)                                     | 12%                                    |
| Over 75 years                          | 36 (7%)                  | 7 (4%)                    | 9 (8%)                                       | 9%                                     |
| Last primary care contact              | missing=88               | missing=39                | missing=14                                   | GP patient<br>survey(24)               |
| Within last week                       | 169 (31%)                | 65 (35%)                  | 48 (41%)                                     | 84% within last<br>12 months           |
| Within last month                      | 248 (45%)                | 79 (43%)                  | 47 (40%)                                     |                                        |
| Within last 12 months                  | 121 (22%)                | 34 (18%)                  | 20 (17%)                                     |                                        |
| Over 12 months ago                     | 12 (2%)                  | 6 (3%)                    | 3 (3%)                                       |                                        |
| Usual primary care usage               | missing=88               | missing=40                | missing=17                                   |                                        |
| At least once a month                  | 181 (33%)                | 73 (40%)                  | 52 (45%)                                     | -                                      |
| At least once per 6 months             | 285 (52%)                | 79 (43%)                  | 45 (39%)                                     | -                                      |
| Once per 12 months or less             | 84 (15%)                 | 31 (17%)                  | 18 (16%)                                     | -                                      |

<sup>1</sup><http://content.digital.nhs.uk/searchcatalogue?productid=24139&topics=1%2fWorkforce%2fStaff+numbers&sort=Relevance&size=10&page=1#top>

<sup>2</sup><https://www.ons.gov.uk/peoplepopulationandcommunity/populationandmigration/populationestimates/bulletins/annualmidyearpopulationestimates/latest>

1 Table 2. Categorisation of patient-perceived potentially-harmful preventable problems occurring in  
 2 the last 12 months following review by clinicians and members of the public

| Group label         | Threshold criteria                                                                                       | GP scores<br>n=132 | PPI scores<br>n=132 |
|---------------------|----------------------------------------------------------------------------------------------------------|--------------------|---------------------|
| 1. Higher threshold | Median score of "very likely or certain" or "probably" or at least one score of "very likely or certain" | 18 (14%)           | 87 (66%)            |
| 2. Lower threshold  | Median score of "possibly" or at least one score of "probably" or higher                                 | 71 (54%)           | 104(79%)            |
| 3. Any possibility  | At least one score of "unlikely" or higher                                                               | 106 (80%)          | 109 (83%)           |
| 4. No problem       | All scores "definitely not" or not-coded                                                                 | 1 (1%)             | 0                   |
| 5. Not-coded        | Insufficient information for coding by all coders                                                        | 25 (19%)           | 23 (17%)            |

- 1 Table 3. Prevalence of respondents reporting a potentially-harmful preventable problem within the  
2 last 12 months and unadjusted and adjusted odds ratios estimated by logistic regression

| Respondent characteristics<br>n=638                   | Frequency – all<br>reported n=132 | Unadjusted<br>OR–all reports | Adjusted <sup>1</sup> OR-<br>all reports | Adjusted <sup>1</sup> OR -<br>after GP review<br>(lower threshold,<br>Table 2) |
|-------------------------------------------------------|-----------------------------------|------------------------------|------------------------------------------|--------------------------------------------------------------------------------|
| <b>Gender (87 missing)</b>                            |                                   |                              |                                          |                                                                                |
| male                                                  | 53/283 (19%)                      | 1 (ref)                      | 1 (ref)                                  | 1 (ref)                                                                        |
| female                                                | 63/268 (24%)                      | 1.3 (0.9 to 2.0)             | 1.4 (0.9 to 2.2)                         | 1.3 (0.7 to 2.3)                                                               |
| <b>Age (85 missing)</b>                               |                                   |                              |                                          |                                                                                |
| 16 to 34 years                                        | 11/42 (26%)                       | 1 (ref)                      | 1 (ref)                                  | 1 (ref)                                                                        |
| 35 to 54 years                                        | 34/143 (24%)                      | 0.9 (0.4 to 1.9)             | 0.8 (0.3 to 1.8)                         | 0.8 (0.3 to 2.1)                                                               |
| 55 to 64 years                                        | 31/162 (19%)                      | 0.7 (0.3 to 1.5)             | 0.7 (0.3 to 1.5)                         | 0.6 (0.2 to 1.7)                                                               |
| 65 to 74 years                                        | 32/170 (19%)                      | 0.7 (0.3 to 1.4)             | 0.6 (0.3 to 1.4)                         | 0.4 (0.2 to 1.2)                                                               |
| Over 75 years                                         | 9/36 (25%)                        | 0.9 (0.3 to 2.6)             | 1.1 (0.4 to 3.2)                         | 0.9 (0.2 to 3.2)                                                               |
| <b>Last primary care contact (88 missing)</b>         |                                   |                              |                                          |                                                                                |
| Within last week                                      | 48/169 (28%)                      | 1 (ref)                      | 1 (ref)                                  | 1 (ref)                                                                        |
| Within last month                                     | 47/248 (19%)                      | 0.6 (0.4 to 0.9)             | 0.7 (0.4 to 1.1)                         | 0.6 (0.3 to 1.0)                                                               |
| Within last 12 months                                 | 20/121 (17%)                      | 0.5 (0.3 to 0.9)             | 0.6 (0.3 to 1.2)                         | 0.5 (0.2 to 1.3)                                                               |
| Over 12 months ago                                    | 3/12 (25%)                        | 0.8 (0.2 to 4.0)             | 0.9 (0.2 to 4.2)                         | 0.4 (0.0 to 3.9)                                                               |
| <b>Usual primary care usage (88 missing)</b>          |                                   |                              |                                          |                                                                                |
| At least once a month                                 | 52/181 (29%)                      | 1 (ref)                      | 1 (ref)                                  | 1 (ref)                                                                        |
| At least once per 6 months                            | 45/285 (16%)                      | 0.5 (0.3 to 0.7)             | 0.6 (0.3 to 0.9)                         | 0.5 (0.3 to 0.9)                                                               |
| Once per 12 months or less                            | 18/84 (21%)                       | 0.7 (0.4 to 1.2)             | 0.8 (0.4 to 1.6)                         | 0.7 (0.3 to 1.8)                                                               |
| <b>Works or volunteers in healthcare (92 missing)</b> |                                   |                              |                                          |                                                                                |
| No                                                    | 72/380 (19%)                      | 1 (ref)                      | 1 (ref)                                  | 1 (ref)                                                                        |
| Yes                                                   | 41/166 (25%)                      | 1.4 (0.9 to 2.2)             | 1.3 (0.8 to 2.1)                         | 1.5 (0.9 to 2.7)                                                               |

- 3  
4 <sup>1</sup>adjusted for gender, age, last primary care contact, usual primary care usage, works or volunteers in  
healthcare

1 Table 4. The patient's response to their perceived potentially-harmful preventable-problem and the  
 2 primary care service involved for problems occurring in the last 12 months

| Primary care service                                        | All reported problems | Clinician ranked "possibly or higher" (Lower threshold) |
|-------------------------------------------------------------|-----------------------|---------------------------------------------------------|
| All services                                                | 132                   | 71                                                      |
| GP surgery                                                  | 97 (73%)              | 61 (86%)                                                |
| Out of hours care/A&E/ambulance                             | 4 (3%)                | 1 (1%)                                                  |
| Walk in clinic                                              | 2 (2%)                | 0                                                       |
| Dental surgery                                              | 4 (3%)                | 1 (1%)                                                  |
| Pharmacy                                                    | 7 (5%)                | 6 (8%)                                                  |
| Community or district nursing                               | 4 (3%)                | 0                                                       |
| Opticians                                                   | 2 (2%)                | 1 (1%)                                                  |
| Mental health services                                      | 1 (1%)                | 0                                                       |
| missing                                                     | 11 (8%)               | 1 (1%)                                                  |
| <b>Did you discuss the problem with primary care staff?</b> |                       |                                                         |
| All respondents                                             | 132                   | 71                                                      |
| Yes – discussed with primary care staff                     | 56 (42%)              | 42 (59%)                                                |
| No – did not discuss with primary care staff                | 67 (51%)              | 29 (41%)                                                |
| missing                                                     | 9 (7%)                | 0                                                       |
| <b>Reason not discussed with primary care staff</b>         |                       |                                                         |
| All not discussing problem                                  | 67                    | 29                                                      |
| Did not feel comfortable to discuss the problem             | 16 (24%)              | 8 (28%)                                                 |
| Could not find anybody with whom to discuss the problem     | 21 (31%)              | 10 (34%)                                                |
| Unconcerned about the problem                               | 7 (10%)               | 5 (17%)                                                 |
| Did not notice the problem at the time (or too ill)         | 11 (16%)              | 4 (14%)                                                 |
| Other                                                       | 5 (7%)                | 2 (7%)                                                  |
| missing                                                     | 7 (10%)               | 0                                                       |
| <b>Profession of discussant</b>                             |                       |                                                         |
| All discussing problem                                      | 56                    | 42                                                      |
| GP                                                          | 28 (50%)              | 19 (45%)                                                |
| Practice manager                                            | 5 (9%)                | 5 (21%)                                                 |
| Receptionist                                                | 2 (4%)                | 1 (2%)                                                  |
| Practice nurse                                              | 6 (11%)               | 5 (12%)                                                 |
| Pharmacist or dispenser                                     | 7 (13%)               | 7 (17%)                                                 |
| Dentist                                                     | 2 (4%)                | 1 (2%)                                                  |
| Dietician                                                   | 1 (2%)                | 1 (2%)                                                  |
| Missing                                                     | 5 (9%)                | 3 (7%)                                                  |
| <b>Role of discussant in patient's care</b>                 |                       |                                                         |
| Member of staff directly involved                           | 23 (41%)              | 16 (38%)                                                |
| Another member of staff at same institution                 | 25 (45%)              | 20 (48%)                                                |
| Above unclear                                               | 8 (14%)               | 6 (14%)                                                 |



1 Table 5. Patient suggestions as to how the potentially-harmful preventable problem might have  
2 been prevented

| How could it be prevented?                                                                                 | All reported problems<br>n=132 | Clinician ranked<br>“possibly or<br>higher” (Lower<br>threshold) n=71 |
|------------------------------------------------------------------------------------------------------------|--------------------------------|-----------------------------------------------------------------------|
| <b>1. More resources - all</b>                                                                             | <b>14 (11%)</b>                | <b>3 (4%)</b>                                                         |
| 1.1 Quicker access to primary care                                                                         | 7 (5%)                         | 2 (3%)                                                                |
| 1.2 More thorough and quicker investigations                                                               | 2 (2%)                         | 1 (1%)                                                                |
| 1.3 Fewer demands on primary care – more staff or fewer patients                                           | 1 (1%)                         | 0                                                                     |
| 1.4 More time with clinicians for treatment and diagnosis                                                  | 2 (2%)                         | 0                                                                     |
| 1.9 Provision of resources to manage long term conditions                                                  | 1 (1%)                         | 0                                                                     |
| 1.10 Provision of patient travel service for routine appointments                                          | 1 (1%)                         | 0                                                                     |
| <b>2. Improved communication and involvement of patients</b>                                               | <b>26 (20%)</b>                | <b>18 (25%)</b>                                                       |
| 2.1 Listen to the patient and trust their judgement more                                                   | 21 (16%)                       | 15 (21%)                                                              |
| 2.2 Tell patients about their diagnosis, test results, changes in medication or loss of results            | 3 (2%)                         | 1 (1%)                                                                |
| 2.3 Improve communication between staff (within or outside primary care)                                   | 2 (2%)                         | 2 (3%)                                                                |
| <b>3. Better organisation and administration</b>                                                           | <b>17 (13%)</b>                | <b>10 (14%)</b>                                                       |
| 3.1 Follow up referrals and appointments to ensure they happen, be consistent in sending routine reminders | 10 (8%)                        | 3 (4%)                                                                |
| 3.2 Log in or process results as soon as received to avoid loss                                            | 1 (1%)                         | 1 (1%)                                                                |
| 3.3 Keep the notes up to date, well-organised, safe and ensure information is transcribed accurately       | 5 (4%)                         | 5 (7%)                                                                |
| 3.4 Keep a record of the location of equipment                                                             | 1 (1%)                         | 1 (1%)                                                                |
| <b>4. Improved prescribing systems</b>                                                                     | <b>18 (14%)</b>                | <b>17 (24%)</b>                                                       |
| 4.1 More when checks on prescribing and dispensing                                                         | 8 (6%)                         | 8 (11%)                                                               |
| 4.2 Check repeat prescriptions carefully, especially for transcribing errors                               | 8 (6%)                         | 7 (10%)                                                               |
| 4.3 Use medication reviews and IT clinical decision support systems                                        | 2 (2%)                         | 2 (3%)                                                                |
| <b>5. Better clinical practice</b>                                                                         | <b>19 (14%)</b>                | <b>10 (14%)</b>                                                       |
| 5.1 Take in to account all the patient’s information - their medical history and results and letters       | 13 (10%)                       | 7 (10%)                                                               |
| 5.2 Address the patient’s problem in some way – patients can feel their problem is being ignored           | 5 (4%)                         | 2 (3%)                                                                |
| 5.3 Act on advice from other clinicians and test results                                                   | 1 (1%)                         | 1 (1%)                                                                |
| <b>6. Staff training</b>                                                                                   | <b>11 (8%)</b>                 | <b>7 (10%)</b>                                                        |
| 6.1 More informed and better trained staff                                                                 | 11 (8%)                        | 7 (10%)                                                               |
| <b>Other responses</b>                                                                                     | <b>27 (20%)</b>                | <b>6 (8%)</b>                                                         |
| •Don’t know/missing                                                                                        | 21 (16%)                       | 3 (4%)                                                                |
| •Problem was due to an individual member of staff                                                          | 2 (2%)                         | 1 (1%)                                                                |
| •Prescribe right, better, different, more, less medicine                                                   | 1 (1%)                         | 0                                                                     |
| •Better organisation                                                                                       | 1 (1%)                         | 0                                                                     |
| •Laboratory procedures were the problem                                                                    | 2 (2%)                         | 2 (3%)                                                                |

1  
2  
3 1 References  
4 2

- 5 3 1. Rhodes P, Campbell S, Sanders C. Trust, temporality and systems: how do patients understand  
6 4 patient safety in primary care? A qualitative study. *Health Expectations*. 2016;19(2):253-63.  
7 5  
8 6 2. Vincent C, Amalberti R. *Safer Healthcare: Strategies for the Real World*. Springer, 2016.  
9 7 <http://www.springer.com/gb/book/9783319255576> Accessed 04/04/17  
10 8  
11 9 3. Blendon RJ, DesRoches CM, Brodie M, Benson JM, Rosen AB, Schneider E, et al. Views of practicing  
12 10 physicians and the public on medical errors. *N Engl J Med*. 2002;347(24):1933-40.  
13 11  
14 12 4. Hotvedt R, Forde OH. Doctors are to blame for perceived medical adverse events. A cross  
15 13 sectional population study. *The Tromso Study*. *BMC health services research*. 2013;13:46.  
16 14  
17 15 5. Kuzel AJ, Woolf SH, Gilchrist VJ, Engel JD, LaVeist TA, Vincent C, et al. Patient reports of  
18 16 preventable problems and harms in primary health care. *Ann Fam Med*. 2004;2(4):333-40.  
19 17  
20 18 6. The Health Foundation. Evidence scan: Involving patients in improving safety. January 2013.  
21 19 <http://www.health.org.uk/sites/health/files/InvolvingPatientsInImprovingSafety.pdf> Accessed  
22 20 04/04/17  
23 21  
24 22 7. Basch E. The missing voice of patients in drug-safety reporting. *N Engl J Med*. 2010;362(10):865-9.  
25 23  
26 24 8. King A, Daniels J, Lim J, Cochrane DD, Taylor A, Ansermino JM. Time to listen: a review of methods  
27 25 to solicit patient reports of adverse events. *Qual Saf Health Care*. 2010;19(2):148-57.  
28 26  
29 27 9. Longtin Y, Sax H, Leape LL, Sheridan SE, Donaldson L, Pittet D. Patient participation: current  
30 28 knowledge and applicability to patient safety. *Mayo Clinic proceedings*. 2010;85(1):53-62.  
31 29  
32 30 10. Sanders J, Esmail A. The frequency and nature of medical error in primary care: understanding  
33 31 the diversity across studies. *Family practice*. 2003;20(3):231-6.  
34 32  
35 33 11. Panesar SS, deSilva D, Carson-Stevens A, Cresswell KM, Salvilla SA, Slight SP, et al. How safe is  
36 34 primary care? A systematic review. *BMJ Quality & Safety*. 2016;25(7):544-53.  
37 35  
38 36 12. Michel P, Brami J, Chaneliere M, Kret M, Mosnier A, Dupie I, et al. Patient safety incidents are  
39 37 common in primary care: A national prospective active incident reporting survey. *PLoS One*.  
40 38 2017;12(2):e0165455.  
41 39  
42 40 13. NHS Improvement. National quarterly data on patient safety incident reports. September 2016.  
43 41 [https://improvement.nhs.uk/resources/national-quarterly-data-patient-safety-incident-reports-](https://improvement.nhs.uk/resources/national-quarterly-data-patient-safety-incident-reports-september-2016/)  
44 42 [september-2016/](https://improvement.nhs.uk/resources/national-quarterly-data-patient-safety-incident-reports-september-2016/) Accessed 04/04/17  
45 43  
46 44 14. Hutchinson A, Young TA, Cooper KL, McIntosh A, Karnon JD, Scobie S, et al. Trends in healthcare  
47 45 incident reporting and relationship to safety and quality data in acute hospitals: results from the  
48 46 National Reporting and Learning System. *Qual Saf Health Care*. 2009;18(1):5-10.  
49 47  
50 48 15. NHS England. General practice patient safety reporting form launched. 26th February 2015.  
51 49 <https://www.england.nhs.uk/2015/02/gp-patient-safety-reporting/> Accessed 04/04/17  
52 50  
53  
54  
55  
56  
57  
58  
59  
60

- 1  
2  
3 1 16. The Health Foundation. Evidence Scan: Improving safety in primary care. November 2011.  
4 2 <http://www.health.org.uk/sites/health/files/ImprovingSafetyInPrimaryCare.pdf> Accessed 04/04/17  
5 3  
6 4 17. European Commission. Special Eurobarometer 411 Patient Safety and Quality of Care 2014.  
7 5 DOI:10.2772/33467  
8 6 [https://ec.europa.eu/health/sites/health/files/patient\\_safety/docs/ebs\\_411\\_sum\\_en.pdf](https://ec.europa.eu/health/sites/health/files/patient_safety/docs/ebs_411_sum_en.pdf)  
9 7 Accessed 04/04/17  
10 8  
11 9 18. Mira JJ, Nebot C, Lorenzo S, Perez-Jover V. Patient report on information given, consultation time  
12 10 and safety in primary care. Qual Saf Health Care. 2010;19(5):e33.  
13 11  
14 12 19. Wasson JH, MacKenzie TA, Hall M. Patients use an internet technology to report when things go  
15 13 wrong. Qual Saf Health Care. 2007;16(3):213-5.  
16 14  
17 15 20. Ricci-Cabello I, Goncalves DC, Rojas-Garcia A, Valderas JM. Measuring experiences and outcomes  
18 16 of patient safety in primary care: a systematic review of available instruments. Family practice.  
19 17 2015;32(1):106-19.  
20 18  
21 19 21. Ricci-Cabello I, Avery AJ, Reeves D, Kadam UT, Valderas JM. Measuring Patient Safety in Primary  
22 20 Care: The Development and Validation of the "Patient Reported Experiences and Outcomes of Safety  
23 21 in Primary Care" (PREOS-PC). Ann Fam Med. 2016;14(3):253-61.  
24 22  
25 23 22. Ricci-Cabello I, Saletti-Cuesta L, Slight SP, Valderas JM. Identifying patient-centred  
26 24 recommendations for improving patient safety in General Practices in England: a qualitative content  
27 25 analysis of free-text responses using the Patient Reported Experiences and Outcomes of Safety in  
28 26 Primary Care (PREOS-PC) questionnaire. Health Expectations. 2017.  
29 27  
30 28 23. Stocks SJ, Giles SJ, Cheraghi-Sohi S, Campbell SM. Application of a tool for the evaluation of  
31 29 public and patient involvement in research. BMJ Open. 2015;5(3).  
32 30  
33 31 24. NHS England. GP Patient Survey – National summary report. January 2016. [http://gp-survey-](http://gp-survey-production.s3.amazonaws.com/archive/2016/January/January+2016+National+Summary+Report.pdf)  
34 32 [production.s3.amazonaws.com/archive/2016/January/January+2016+National+Summary+Report.pdf](http://gp-survey-production.s3.amazonaws.com/archive/2016/January/January+2016+National+Summary+Report.pdf)  
35 33 [f](http://gp-survey-production.s3.amazonaws.com/archive/2016/January/January+2016+National+Summary+Report.pdf) Accessed 04/04/17  
36 34  
37 35 25. Dovey SM, Meyers DS, Phillips RL, Jr., Green LA, Fryer GE, Galliher JM, et al. A preliminary  
38 36 taxonomy of medical errors in family practice. Qual Saf Health Care. 2002;11(3):233-8.  
39 37  
40 38 26. Makeham MA, Dovey SM, County M, Kidd MR. An international taxonomy for errors in general  
41 39 practice: a pilot study. Med J Aust. 2002;177(2):68-72.  
42 40  
43 41 27. Kistler CE, Walter LC, Mitchell C, Sloane PD. Patient perceptions of mistakes in ambulatory care.  
44 42 Archives of Internal Medicine. 2010;170(16):1480-7.  
45  
46  
47  
48  
49 43  
50  
51  
52  
53  
54  
55  
56  
57  
58  
59  
60

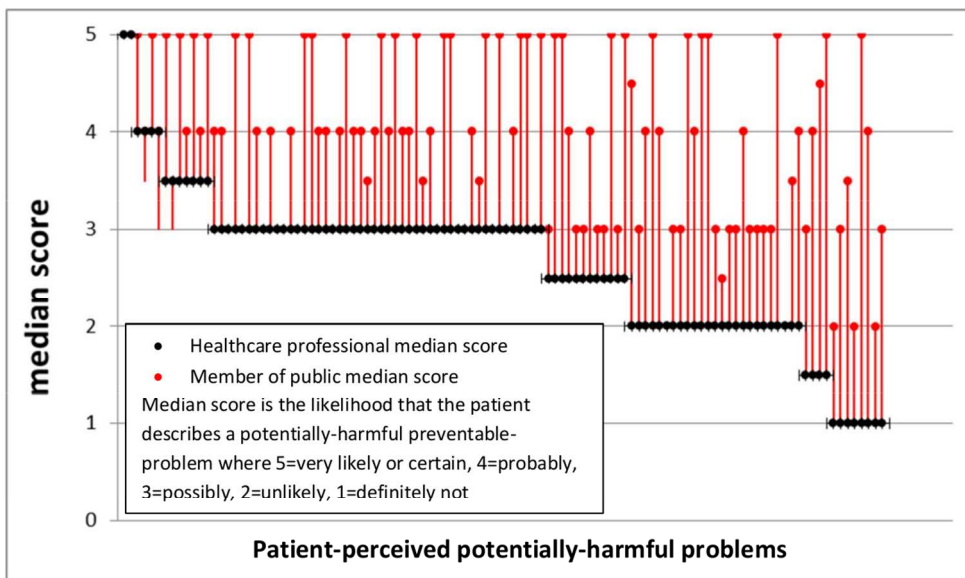

Figure 1. Median estimates as to the likelihood that the patient describes a potentially-harmful preventable-problem occurring in the last 12 months by six clinicians and seven members of the public

170x102mm (200 x 200 DPI)

Review only

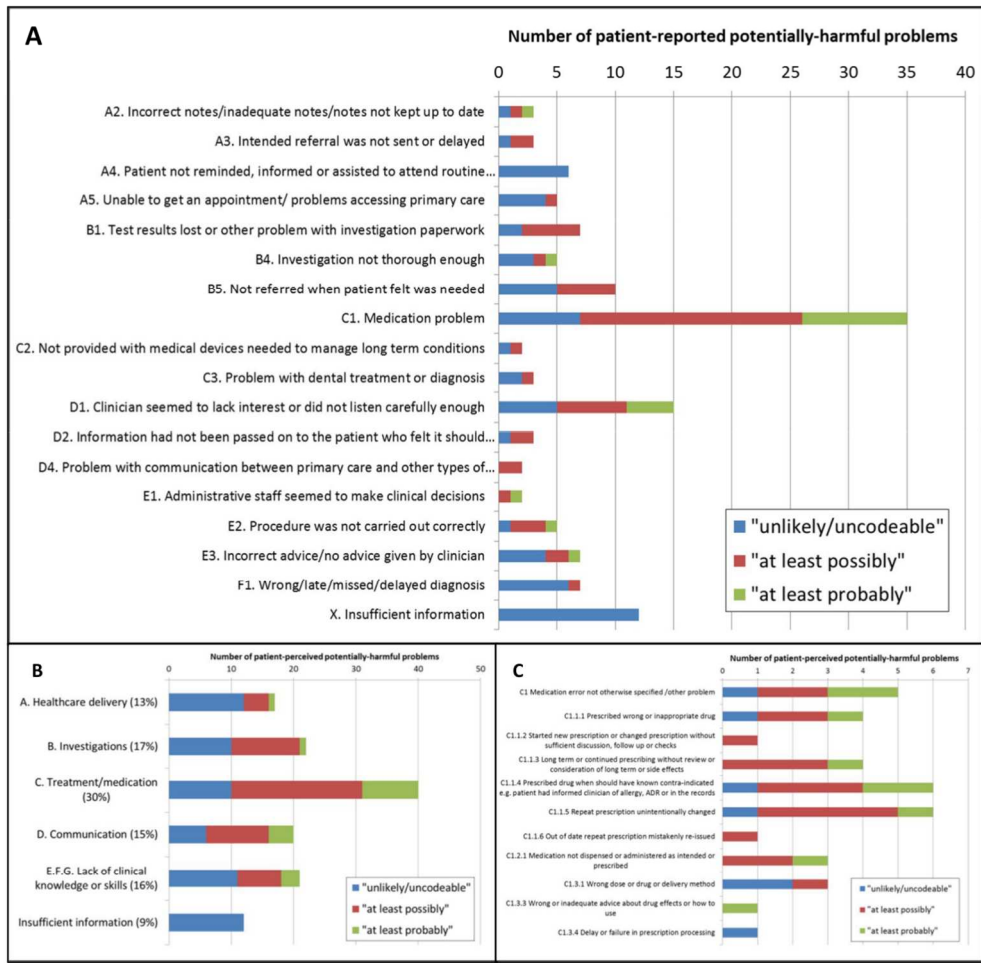

See Appendix 2 for details of coding; A coded to 2 levels, B coded to 1 level, C medication problems coded to 3 levels

Fig 2. Numbers of patient-perceived problems occurring in the last 12 months categorised according to the patient's description with clinician ranking as to the likelihood it is a potentially-harmful preventable problem (Table 2).

173x168mm (200 x 200 DPI)

Appendix 1. Details of public and clinician contributors and surveys

Table A. Demographics of clinicians and members of the public reviewing the patient-reported problems and estimating the likelihood the scenarios describes a potentially-harmful preventable-problem occurring in primary care

|                                                                                                                                                                                                                                                                  |                      |
|------------------------------------------------------------------------------------------------------------------------------------------------------------------------------------------------------------------------------------------------------------------|----------------------|
| <b>Demographics of GP and dentist coders</b>                                                                                                                                                                                                                     | <b>frequency n=6</b> |
| <b>Gender</b>                                                                                                                                                                                                                                                    |                      |
| Female                                                                                                                                                                                                                                                           | 3                    |
| Male                                                                                                                                                                                                                                                             | 3                    |
| <b>Years working as a GP or dentist</b>                                                                                                                                                                                                                          |                      |
| Less than 15 years                                                                                                                                                                                                                                               | 1                    |
| 15 to 25 years                                                                                                                                                                                                                                                   | 2                    |
| Over 25 years                                                                                                                                                                                                                                                    | 3                    |
| <b>Current position</b>                                                                                                                                                                                                                                          |                      |
| Partner                                                                                                                                                                                                                                                          | 4                    |
| Retired within last 12 months                                                                                                                                                                                                                                    | 2                    |
| <b>Demographics of the members of the public</b>                                                                                                                                                                                                                 |                      |
| <b>frequency n=7</b>                                                                                                                                                                                                                                             |                      |
| <b>Gender</b>                                                                                                                                                                                                                                                    |                      |
| Female                                                                                                                                                                                                                                                           | 6                    |
| Male                                                                                                                                                                                                                                                             | 1                    |
| <b>Age</b>                                                                                                                                                                                                                                                       |                      |
| 30 to 39 years                                                                                                                                                                                                                                                   | 2                    |
| 40 to 49 years                                                                                                                                                                                                                                                   | 1                    |
| 50 to 59 years                                                                                                                                                                                                                                                   | 2                    |
| 60 to 69 years                                                                                                                                                                                                                                                   | 2                    |
| <b>Ethnicity</b>                                                                                                                                                                                                                                                 |                      |
| White British                                                                                                                                                                                                                                                    | 5                    |
| British Indian                                                                                                                                                                                                                                                   | 2                    |
| <b>Years of PPI experience</b>                                                                                                                                                                                                                                   |                      |
| None                                                                                                                                                                                                                                                             | 2                    |
| Less than 1 year                                                                                                                                                                                                                                                 | 1                    |
| 1 to 5 years                                                                                                                                                                                                                                                     | 2                    |
| Over 5 years                                                                                                                                                                                                                                                     | 2                    |
| <b>Further background information</b>                                                                                                                                                                                                                            |                      |
| PPI reviewer 1. Currently working freelance on education and PPI projects; previously worked in a pastoral role at a college; a lay representative for courses training healthcare scientists.                                                                   |                      |
| PPI reviewer 2. Retired primary school teacher with several long term health conditions; single parent; was a young carer for a parent with a long term condition.                                                                                               |                      |
| PPI reviewer 3. Former higher education administrator; current university tutor; patient partner on varied research projects; carer for family members aged 0-100 with physical and/or mental health long term conditions.                                       |                      |
| PI reviewer 4. Currently working as a civil servant and has several long term health conditions.                                                                                                                                                                 |                      |
| PPI reviewer 5. Full-time parent of school age children; previously ten years working in a medical school in an administrative role and 5 years working in the drug and alcohol sector                                                                           |                      |
| PPI reviewer 6. Lay representative for several healthcare-related professional bodies and involved in health research at several universities; family-carer for over 35 years; has had over 6 years of involvement with a mental and community health as a carer |                      |
| PPI reviewer 7. Retired university administrator; a parent and carer for elderly parents.                                                                                                                                                                        |                      |

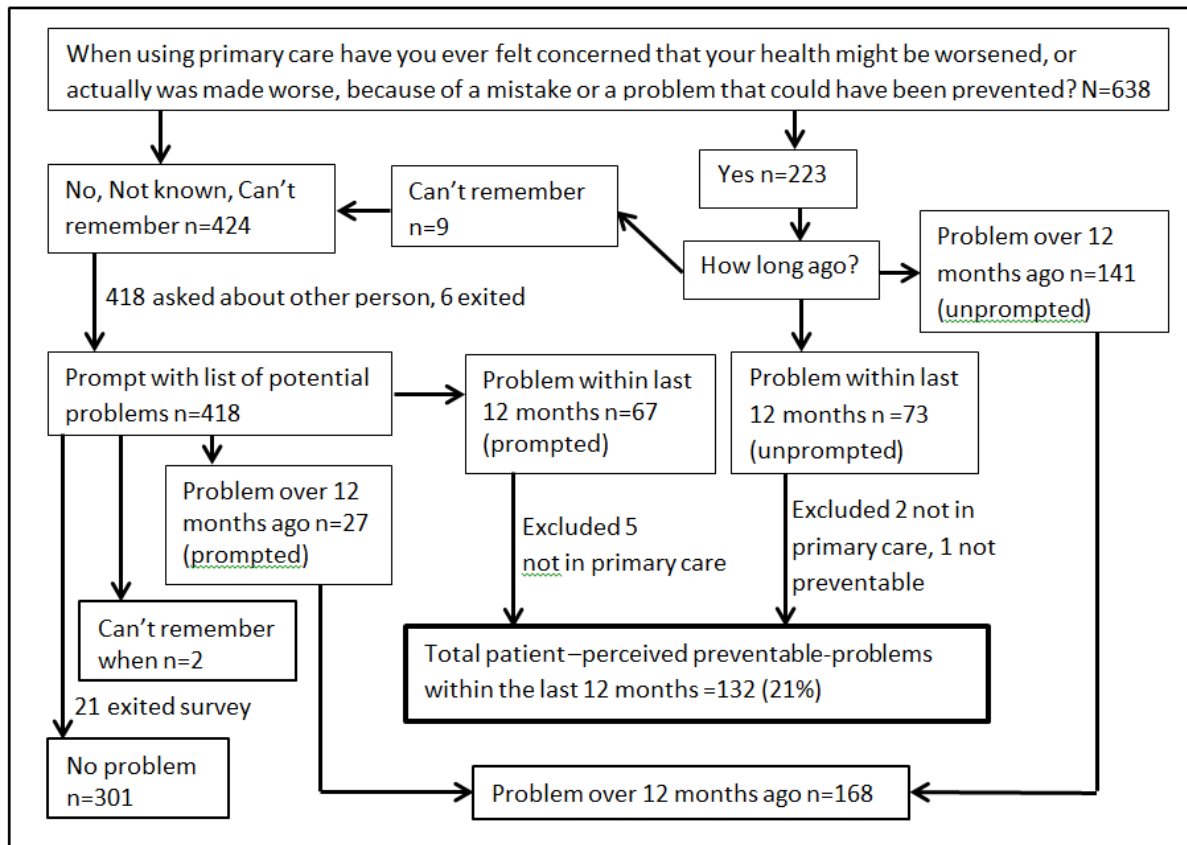

31 Figure A. Flow chart of participants who reported a potentially-unsafe preventable-problem in  
32 primary care through the online pilot survey  
33

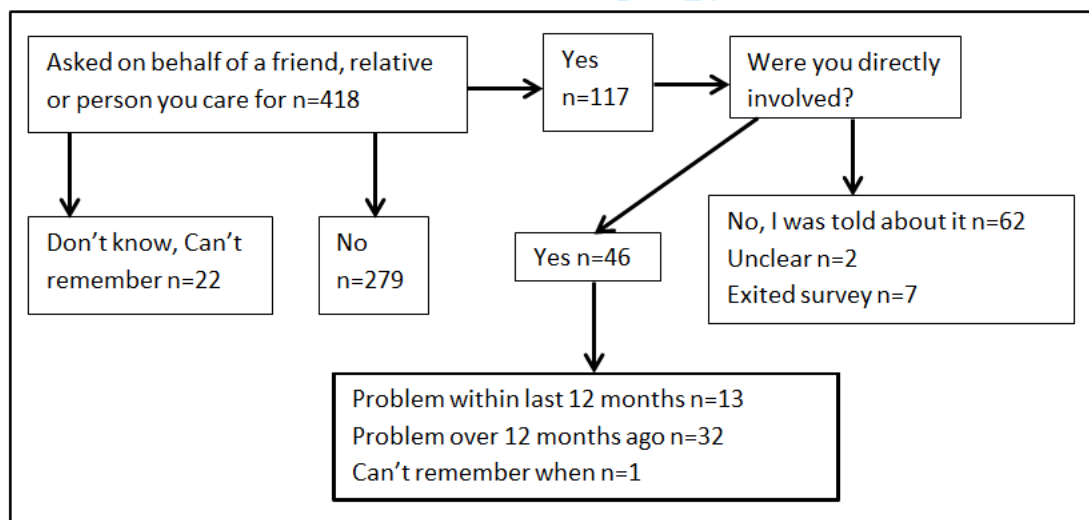

53 Figure B. Flow chart of participants who reported a potentially-unsafe preventable-problem in  
54 primary care on behalf of another person through the online pilot survey  
55  
56  
57  
58  
59  
60

1  
2  
3  
4  
5  
6  
7  
8  
9  
10  
11  
12  
13  
14  
15  
16  
17  
18  
19  
20  
21  
22  
23  
24  
25  
26  
27  
28  
29  
30  
31  
32  
33  
34  
35  
36  
37  
38  
39  
40  
41  
42  
43  
44  
45  
46  
47  
48  
49  
50  
51  
52  
53  
54  
55  
56  
57  
58  
59  
60

**Box A. List of public and patient involvement groups used to distribute the pilot survey**

Associate Research User Group of the Greater Manchester Primary Care Patient Safety Translational Research Centre <http://research.bmh.manchester.ac.uk/primary-care-patient-safety/GetInvolved/>

The Primary Care Research in Manchester Engagement Resource  
<http://research.bmh.manchester.ac.uk/PRIMER/about/>

HelpBeatDiabetes <https://www.researchforthefuture.org/diabetes/>

The Nowgen Centre <https://research.cmft.nhs.uk/getting-involved/involvement>

The Citizen Scientist project <http://www.citizenscientist.org.uk/>

North West People in Research Forum <https://www.northwestpeopleinresearchforum.org/>

**Box B. Pilot survey administered online November and December 2015**

Q1. Did you have confidence and trust in the GP you saw or spoke to at your last appointment?

Response options: Yes, definitely, Yes, to some extent, No, not at all, Don't know / can't say

Q2. When using primary care have you ever felt concerned that your health might be worsened, or actually was made worse, because of a mistake or a problem that could have been prevented?

Response options: Yes, No- go to Q10, Do not understand the question- go to Q10, Don't know / can't remember- go to Q10

Q3. How long ago did the mistake or preventable problem happen?

Response options: Within the last 12 months, More than 12 months ago- go to Q10, Can't remember- go to Q10

Q4. In your opinion did this experience

Response options: Make your health worse, Not certain but it might have made your health worse, Could have made your health worse if you had not noticed the problem, Delayed your treatment but had no effect on your health, Not affect you, or your health, Other, please explain

Q5. Which primary care service were you using when the mistake or preventable problem occurred?

Response options: GP surgery, Out of hours care, Walk in clinic, Dental, Pharmacy, Community or district nursing, Ambulance, Opticians, Other- please specify

Q6. Briefly describe the mistake or problem and how it happened

Response options: free text

Q7. Could the mistake or problem have been avoided? If so how?

Response options: free text

Q8. Were you able to talk about the mistake or problem with anybody working in the primary care service?

Response options: Yes, Yes had the opportunity but did not feel comfortable to discuss the mistake or problem, No I could not find anybody with whom I could discuss the mistake or problem, No I was not concerned about the problem, No I did not notice the mistake or problem at the time, I was



1  
2  
3 too distressed to discuss the mistake or problem, Other or don't know - please describe

4 Q9. If you discussed the mistake or problem with somebody working in primary care please describe  
5 their job or role

6 Response options: free text

7  
8  
9 Q10. In the list below are some examples of preventable problems that might happen when using  
10 primary care. Has anything similar happened to you in the last 12 months? Please check as many as  
11 applicable or "NONE OF BELOW"

12 NONE OF BELOW

13 Wrong or late diagnosis

14 Not referred for further investigation when needed

15 Test results being lost or mixed up

16 Receiving the wrong medicine or wrong dose

17 Should not be prescribed the medicine because of another health problem

18 Should not be prescribed the medicine because of another medication already taking

19 Poor communication leading to misunderstanding of diagnosis or treatment

20 Not referred to a specialist when needed

21 Unclear instructions about treatment

22 Not offering of prevention or screening programmes eg CVD/stroke prevention clinics

23 Failure to recognise or act on vulnerable people's needs eg child abuse, suicide risk or mental health  
24 problems

25 Mistake with a procedure eg dental treatment, injection, ear syringing, physiotherapy

26 Failure to notify about recommended vaccinations eg flu, HPV

27 Poor hygiene

28 Unsafe building or premises

29 Any other preventable problem in the last 12 months (in your opinion)

30 Other, please explain below

31 Q11. Are you male or female? Response options: Male, Female, prefer not to say

32 Q12. How old are you?

33 Response options: under 16, 16 to 24, 25 to 34, 45 to 54, 55 to 64, 65 to 74, 75 to 84, 85 or older

34 Q13. When was your last contact with primary care?

35 Response options: Last week, Last month, Last 12 months, Over 12 months ago

36 Q14. What best describes your usual pattern of use of primary care? Response options: Once per  
37 week, Once per 2 weeks, Once per month, Once per 6 months, Once per 12 months or less often

38 Q15. Are you registered with a GP practice?

39 Response options: Yes, No, I only use walk in centres, Don't know

40 Q16. Do you work or volunteer in healthcare or healthcare research as a professional, patient, carer  
41 or member of the public? (if you are retired answer for your occupation before retirement)

42 Response options: Yes, No

43 Q17. We are still trying to improve this questionnaire so would be grateful for any feedback about  
44 how easy you found the questionnaire to complete? How can it be improved?

45 Response options: free text

46  
47  
48  
49  
50  
51  
52  
53  
54  
55  
56  
57  
58  
59  
60

## Appendix 2.

Table A. Coding of patient-reported potentially-unsafe scenarios in primary care

| <b>1. Errors in the process of the healthcare delivery system</b>                                                                                                                                                                                                                                                                                                                                                                  |                                                                                                                                                                                                                                                                                                                                             |
|------------------------------------------------------------------------------------------------------------------------------------------------------------------------------------------------------------------------------------------------------------------------------------------------------------------------------------------------------------------------------------------------------------------------------------|---------------------------------------------------------------------------------------------------------------------------------------------------------------------------------------------------------------------------------------------------------------------------------------------------------------------------------------------|
| Makeham 2002, Dovey 2002                                                                                                                                                                                                                                                                                                                                                                                                           | Common threads reported in this study                                                                                                                                                                                                                                                                                                       |
| 1.1. Errors in the process of conducting an administrative task                                                                                                                                                                                                                                                                                                                                                                    | A1. Administrative problem not otherwise specified                                                                                                                                                                                                                                                                                          |
| 1.1.1. Information filed in wrong place or wrong time                                                                                                                                                                                                                                                                                                                                                                              |                                                                                                                                                                                                                                                                                                                                             |
| 1.1.2. Unavailability of information that should have been in patients charts<br>1.1.2.1. Entire chart or part of chart could not be accessed when needed<br>1.1.2.2. Care provided was not documented<br>1.1.2.3. Item(s) of information missing from chart                                                                                                                                                                       | A2. Incorrect notes/inadequate notes/notes not kept up to date                                                                                                                                                                                                                                                                              |
| 1.1.3. Errors in patient's movement through the healthcare delivery system                                                                                                                                                                                                                                                                                                                                                         | A3. Intended referral was not sent or delayed<br>A4. Patient not reminded, informed or assisted to attend regular check-ups or other necessary routine treatments                                                                                                                                                                           |
| 1.1.4. Errors in the taking and distributing of messages                                                                                                                                                                                                                                                                                                                                                                           |                                                                                                                                                                                                                                                                                                                                             |
| 1.1.5. Errors in managing appointments for healthcare                                                                                                                                                                                                                                                                                                                                                                              | A5. Unable to get an appointment/other problems with making appointment<br>A6. Ambulance delayed or did not arrive                                                                                                                                                                                                                          |
| <b>1.2. Errors in the process of investigating a patient's condition</b>                                                                                                                                                                                                                                                                                                                                                           |                                                                                                                                                                                                                                                                                                                                             |
| 1.2.1. Laboratory errors<br>1.2.1.1. Wrong test ordered or test not ordered when appropriate<br>1.2.1.2. Errors in the process of obtaining or processing a laboratory specimen<br>1.2.1.3. Error in the process of physician receiving accurate laboratory results in a timely fashion<br>1.2.1.4. Inappropriate response to an abnormal laboratory result                                                                        | B1. Test results lost or other problem with investigation paperwork<br>B2. Incorrect interpretation of tests or other investigation results<br>B3. Clinician did not consider patient history sufficiently/did not use patient's notes adequately<br>B4. Investigation not thorough enough<br>B5. Not referred when patient felt was needed |
| 1.2.3. Errors in the processes of other investigations<br>1.2.3.1. Wrong test ordered or test not ordered when appropriate<br>1.2.3.2. Errors in the process of obtaining or processing of other diagnostic investigation<br>1.2.3.3. Error in the process of physician receiving accurate test results of other investigation in a timely fashion<br>1.2.3.4. Inappropriate response to an abnormal result of other investigation |                                                                                                                                                                                                                                                                                                                                             |
| <b>1.3. Errors in the process of treating a patient's condition</b>                                                                                                                                                                                                                                                                                                                                                                |                                                                                                                                                                                                                                                                                                                                             |
| 1.3.1. Errors in the process of treating with medications<br>1.3.1.1. Wrong medication or wrong dose of medication ordered or medication not ordered by physician when appropriate<br>1.3.1.2. Error in the process of delivering a medication order or inappropriate medication order by a provider working under physician supervision<br>1.3.1.3. Error in the process of dispensing medication as ordered                      | C1. Medication problem<br>C2. Not provided with medical devices needed to manage long term conditions                                                                                                                                                                                                                                       |
| 1.3.2. Errors in other treatments                                                                                                                                                                                                                                                                                                                                                                                                  | C3. Problem with dental treatment or                                                                                                                                                                                                                                                                                                        |

|                                                                                                                                                                                                                               |                                                                                                                                                                                                                                                                                               |
|-------------------------------------------------------------------------------------------------------------------------------------------------------------------------------------------------------------------------------|-----------------------------------------------------------------------------------------------------------------------------------------------------------------------------------------------------------------------------------------------------------------------------------------------|
|                                                                                                                                                                                                                               | diagnosis                                                                                                                                                                                                                                                                                     |
| <b>1.4. Errors in the process of communication</b>                                                                                                                                                                            |                                                                                                                                                                                                                                                                                               |
| 1.4.1. Errors in communication between primary healthcare provider and patients                                                                                                                                               | D1. Clinician seemed to lack interest in the patient's health problem or did not listen carefully enough<br>D2. Information about the patient's health had not been passed on to the patient who felt it should have been<br>D3. Communication problem between patient and primary care staff |
| 1.4.2. Errors in communication between healthcare providers                                                                                                                                                                   | D4. Problem with communication between primary care and other types of care including secondary care<br>D5. Disagreement between 2 clinicians                                                                                                                                                 |
| <b>2. Errors arising from lack of clinical knowledge or skills</b>                                                                                                                                                            |                                                                                                                                                                                                                                                                                               |
| 2.1. Errors in the execution of a clinical task<br>2.1.1. Non-clinical staff made the wrong clinical decision<br>2.1.2. Failed to follow standard practice<br>2.1.3. Lacked needed experience or expertise in a clinical task | E1. Administrative staff seemed to make clinical decisions<br>E2. Procedure was not carried out correctly<br>E3. Incorrect advice/no advice given by clinician                                                                                                                                |
| <b>2.2. Errors in diagnosis</b><br>2.2.1. Wrong or delayed diagnosis                                                                                                                                                          | F1. Wrong/late/missed/delayed diagnosis                                                                                                                                                                                                                                                       |
| <b>2.3. Wrong treatment decision</b>                                                                                                                                                                                          | G1. Wrong treatment decision                                                                                                                                                                                                                                                                  |
|                                                                                                                                                                                                                               | H. Other                                                                                                                                                                                                                                                                                      |
|                                                                                                                                                                                                                               | X. Not a problem/ insufficient information/refused/don't know                                                                                                                                                                                                                                 |

Table B. Level 4 coding of patient-reported potentially-unsafe medication scenarios

|                                                                                                                                                                 |
|-----------------------------------------------------------------------------------------------------------------------------------------------------------------|
| Common threads reported in this study grouped as described by Makeham 2002, Dovey 2002                                                                          |
| C1 Medication error not otherwise specified /other problem                                                                                                      |
| • <b>1.3.1.1. Ordering medications (prescribing)</b>                                                                                                            |
| C1.1.1 Prescribed wrong or inappropriate drug                                                                                                                   |
| C1.1.2 Started new prescription or changed prescription without sufficient discussion, follow up or checks                                                      |
| C1.1.3 Long term or continued prescribing without review or consideration of long term or side effects                                                          |
| C1.1.4 Prescribed drug when should have known contra-indicated <i>e.g.</i> patient had informed clinician of allergy, adverse reaction or it was in the records |
| C1.1.5 Repeat prescription unintentionally changed                                                                                                              |
| C1.1.6 Out of date repeat prescription mistakenly re-issued                                                                                                     |
| • <b>1.3.1.2./1.3.1.3. Implementing or receiving medications (dispensing or issuing)</b>                                                                        |
| C1.2.1 Medication not dispensed or administered as intended or prescribed                                                                                       |
| • <b>1.3.1.1/1.3.1.2./1.3.1.3. Ordering, implementing or receiving medications</b>                                                                              |
| C1.3.1 Wrong dose or drug or delivery method                                                                                                                    |
| C1.3.2 Being given another patient's drugs or prescription                                                                                                      |
| C1.3.3 Wrong or inadequate advice about drug effects or how to use                                                                                              |
| C1.3.4 Delay or failure in prescription processing                                                                                                              |

Table C. Scoring for likelihood that the patient-reported scenario is potentially-unsafe

| Score | How likely do you think it is the patient was correct in thinking that their health might be worsened, or actually was made worse, because of a mistake or a problem in primary care that could have been prevented? Choose from the options below. |
|-------|-----------------------------------------------------------------------------------------------------------------------------------------------------------------------------------------------------------------------------------------------------|
| 5     | Very likely or certain (75-100% confident is a potentially unsafe scenario)                                                                                                                                                                         |
| 4     | Probably (50-74% confident is a potentially unsafe scenario)                                                                                                                                                                                        |
| 3     | Possibly (25-49% confident is a potentially unsafe scenario)                                                                                                                                                                                        |
| 2     | Unlikely (bottom 25% confident is a potentially unsafe scenario)                                                                                                                                                                                    |
| 1     | Definitely not a potentially unsafe event (0% chance is a potentially unsafe scenario)                                                                                                                                                              |
| -     | Insufficient information                                                                                                                                                                                                                            |
| -     | Don't know                                                                                                                                                                                                                                          |
| -     | Other - add text at end of row                                                                                                                                                                                                                      |

Patient reported scenarios occurring during the past 12 months that GPs scored as higher likelihood to be a potentially-unsafe preventable-problem in primary care (median score is higher than “possibly” and at least 2 GPs gave a score or one GP scored “very likely or certain”) originating from the pilot survey

#### Scenario4. GP surgery

**Briefly describe the mistake or problem and how it happened.** *“Prescription drug, anti-inflammatory for arthritis, caused acute stomach pains & violent vomiting. Repeat prescription for twelve years without any discussion.”*

**Could the mistake or problem have been avoided? If so how?** *“Possible discussion about dangers of continuous taking of prescription drugs, which in the event were stopped after the incident.”*

**Were you able to talk about the mistake or problem with anybody working in the primary care service?** *“No I did not notice the mistake or problem at the time”*

**Patient-reported prospect of harm:** suspected your health has been made worse by a problem or error that could have been prevented

**Patient-perspective problem-type code:** C1.1.3 Long term or continued prescribing without review or consideration of long term or side effects

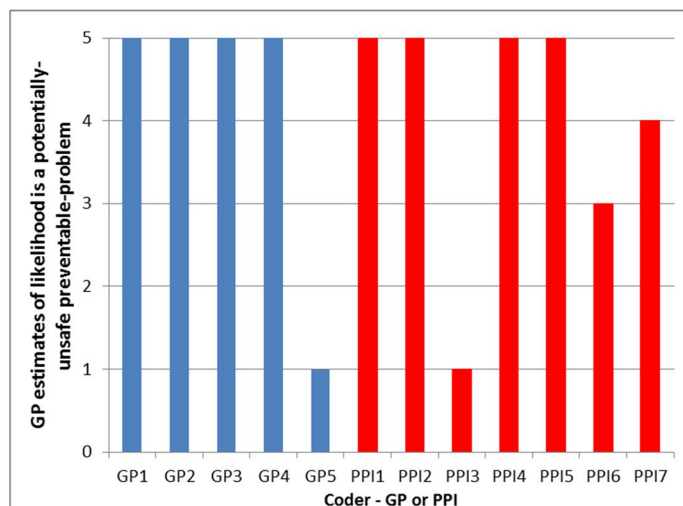

5=very likely or certain, 4=probably, 3=possibly, 2=unlikely, 1=definitely not, 0 = insufficient information or don't know

#### Scenario236. GP surgery

**Briefly describe the mistake or problem and how it happened.** *“Insulin type was changed by specialist but previous insulin prescribed by GP as notes had not been updated”*

**Could the mistake or problem have been avoided? If so how?** *“Yes GP notes should have been updated with new medication”*

**Were you able to talk about the mistake or problem with anybody working in the primary care service?** *“Practice manager resolved the problem and apologised”*

**Patient-reported prospect of harm:** prompted via Q10 (Box 1 main paper)

**Patient-perspective problem-type code:** A2. Incorrect notes/inadequate notes/notes not kept up to date; C1.1.6 Out of date repeat prescription mistakenly re-issued

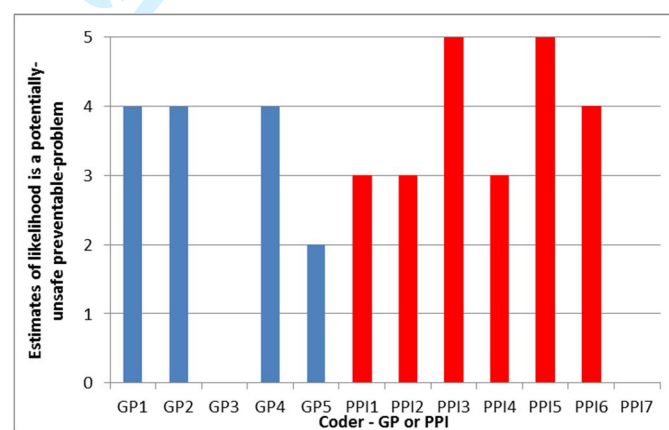

5=very likely or certain, 4=probably, 3=possibly, 2=unlikely, 1=definitely not, 0 = insufficient information or don't know

**Scenario229. GP surgery**

**Briefly describe the mistake or problem and how it happened.** *“Two out of three Doctors not listening to what I was asking; April I had two big bleeds from my Penis, Doctor 1 did a test and gave antibiotics. Went to 2nd Doctor for Diabetic check and told him of problem - nothing except another test come back in ten days. Went to the third doctor who said the test didn't show anything but when I mentioned my feelings about a problem, he look and said yes you do have a problem. In 2 weeks I was in having tests and 3 operations for cancer.”*

**Could the mistake or problem have been avoided? If so how?** *“Listen to me”*

**Were you able to talk about the mistake or problem with anybody working in the primary care service?** *“No, I could not find anybody with whom I could discuss the mistake or problem (The third doctor was amazing with me. He said to keep in touch and if I had any problems to ring him and he still wants me to ring him after my three operations.)”*

**Patient-reported prospect of harm:** suspected your health has been made worse by a problem or error that could have been prevented

**Patient-perspective problem-type code:** D1. Clinician seemed to lack interest in the patient’s health problem or did not listen carefully enough; F1. Wrong/late/missed/delayed diagnosis

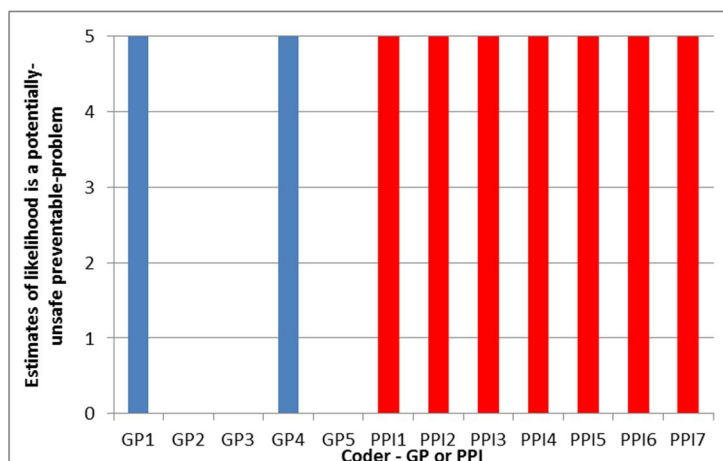

5=very likely or certain, 4=probably, 3=possibly, 2=unlikely, 1=definitely not, 0 = insufficient information or don't know

**Scenario113. GP surgery**

**Briefly describe the mistake or problem and how it happened.** *“Changed diabetes medication to an alternative which my notes from 1980's should show I respond badly to”*

**Could the mistake or problem have been avoided? If so how?** *“Read the notes on every medication change but unfortunately that is unrealistic under the time restrictions on GP's. Put early notes on-line and flag medication allergies/problems.”*

**Were you able to talk about the mistake or problem with anybody working in the primary care service?** *“Yes, my own GP who had returned from holiday”*

**Patient-reported prospect of harm:** suspected your health has been made worse by a problem or error that could have been prevented

**Patient-perspective problem-type code:** C1.1.4 Prescribed drug when should have known contra-indicated e.g. patient had informed clinician of allergy, adverse reaction or it was in the records

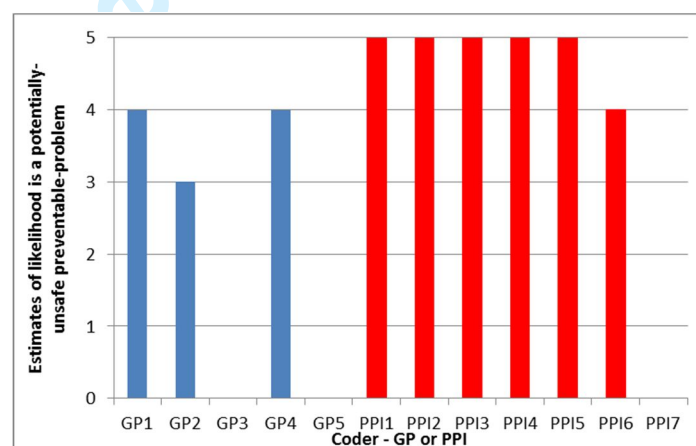

5=very likely or certain, 4=probably, 3=possibly, 2=unlikely, 1=definitely not, 0 = insufficient information or don't know

**Scenario297. GP surgery**

**Briefly describe the mistake or problem and how it happened.** *"Told the GP the medication was making my hair fall out & he kept me on it for another 3 months. I had to see another GP to get him to change my medication. In the meantime I have lost 3/4 of my hair. Not sure if it will ever grow back."*

**Could the mistake or problem have been avoided? If so how?** *"yes, by the GP listening to*

*what I was saying."*

**Were you able to talk about the mistake or problem with anybody working in the primary care service?** *"Yes, GP"*

**Patient-reported prospect of harm:** suspected your health has been made worse by a problem or error that could have been prevented

**Patient-perspective problem-type code:** D1. Clinician seemed to lack interest in the patient's health problem or did not listen carefully enough; C1.1.3 Long term or continued prescribing without review or consideration of long term or side effects

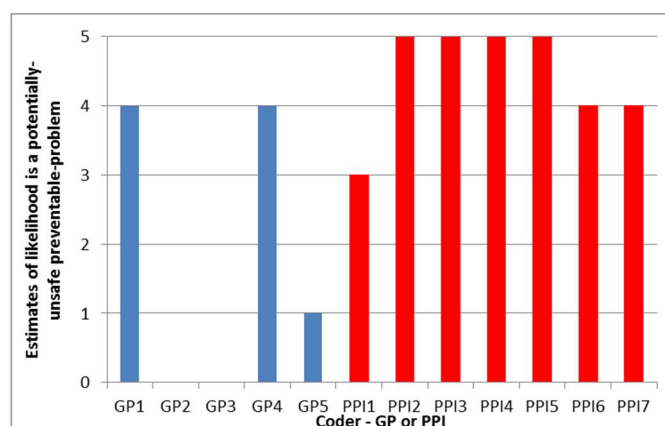

5=very likely or certain, 4=probably, 3=possibly, 2=unlikely, 1=definitely not, 0 = insufficient information or don't know

**Scenario177. GP surgery**

**Briefly describe the mistake or problem and how it happened.** *"Successfully treated for prostate cancer 2006 but suffered some loss of sexual performance; Viagra recommended BUT I take isosorbide nitrate for a following heart attack; the two are contradictory and could produce further heart problems. A routine diabetes check-up at which the sexual problem was discussed saw an automatic prescribing of Viagra; obviously without reference to my medical records."*

**Could the mistake or problem have been avoided? If so how?** *"Read the medical notes."*

**Were you able to talk about the mistake or problem with anybody working in the primary care service?** *"No; I felt I was going to cause trouble"*

**Patient-reported prospect of harm:** prompted via Q10 (Box 1 main paper)

**Patient-perspective problem-type code:** C1.1.1 Prescribed wrong or inappropriate drug

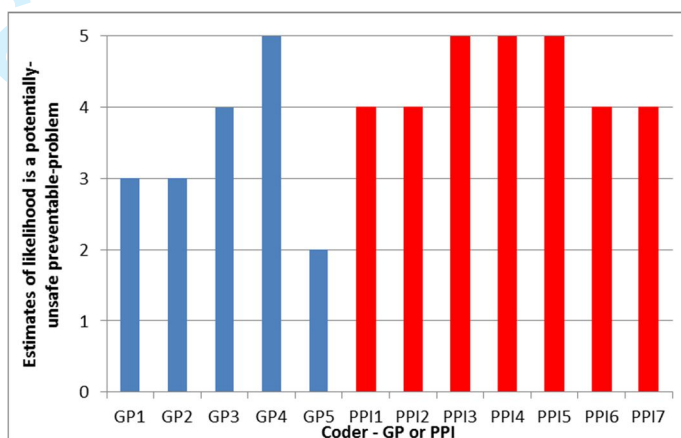

5=very likely or certain, 4=probably, 3=possibly, 2=unlikely, 1=definitely not, 0 = insufficient information or don't know

**Scenario404. GP surgery**

**Briefly describe the mistake or problem and how it happened.** *“I was given steroids for a chest infection but not alerted to the fact they make your sugars go massively high! Within a few hours I was high and not able to bring them down, fearing a DKA I headed for the hospital to correct a very easily avoidable issue. I also attended my GP 6 years ago to be given strong antacids for pain in my stomach that was actually a DKA I was admitted to hospital a few hours later! The GP never even*

*suggested it could be linked to my diabetes and as it was my first DKA I had no idea that's how they can feel”*

**Could the mistake or problem have been avoided? If so how?** *“Both could have been avoided The steroids - if the prescribing nurse had considered my diabetes I'd have been given proper advice as to how to deal with them as a diabetic or given different meds. The DKA simple questions or explanation as to how DKAs can present would have made me family and the doctor realise I was in trouble.”*

**Were you able to talk about the mistake or problem with anybody working in the primary care service?** *“I wrote a letter to the surgery concerning the steroids anonymously to alert them of my concern and the DKA. I was too poorly to even consider seeking correction or explanation”*

**Patient-reported prospect of harm:** health was actually made worse by a problem or error that could have been prevented

**Patient-perspective problem-type code:** C1.1.4 Prescribed drug when should have known contra-indicated e.g. patient had informed clinician of allergy, adverse reaction or it was in the records; E3. Incorrect advice/no advice given by clinician

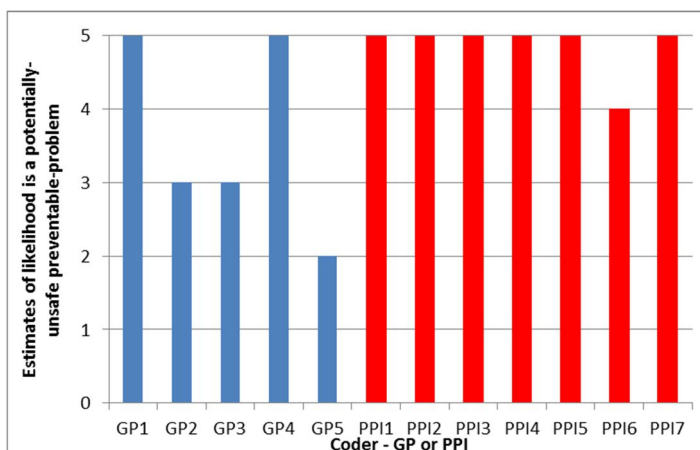

5=very likely or certain, 4=probably, 3=possibly, 2=unlikely, 1=definitely not, 0 = insufficient information or don't know

**Scenario29. GP surgery**

**Briefly describe the mistake or problem and how it happened.** *“reception staff making clinical decisions which were at odds with what had been discussed with my GP”*

**Could the mistake or problem have been avoided? If so how?** *“Yes, reception staff shouldn't be making clinical decisions”*

**Were you able to talk about the mistake or problem with anybody working in the primary care service?** *“No, had the opportunity but did not feel comfortable to discuss the mistake or problem”*

**Patient-reported prospect of harm:** suspected your health has been made worse by a problem or error that could have been prevented

**Patient-perspective problem-type code:** E1. Administrative staff seemed to make clinical decisions

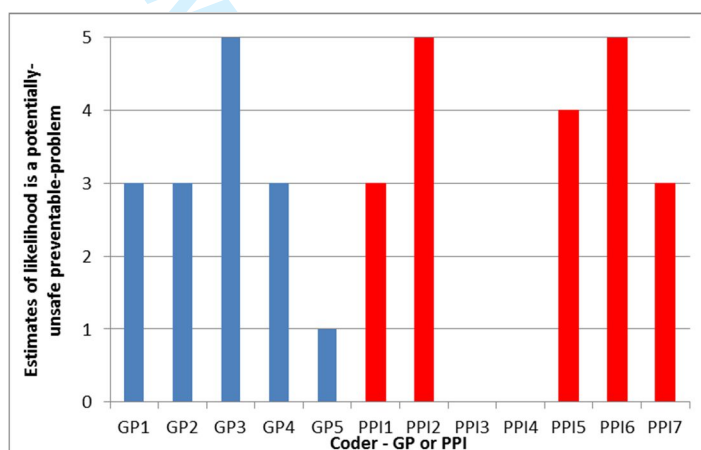

5=very likely or certain, 4=probably, 3=possibly, 2=unlikely, 1=definitely not, 0 = insufficient information or don't know



**Scenario621. Pharmacist**

**Briefly describe the mistake or problem and how it happened.** *"I was given a medicine belonging to somebody else as part of my monthly repeat prescription"*

**Could the mistake or problem have been avoided? If so how?** *"More care and attention when checking"*

**Were you able to talk about the mistake or problem with anybody working in the primary care service?** *"Yes, pharmacist"*

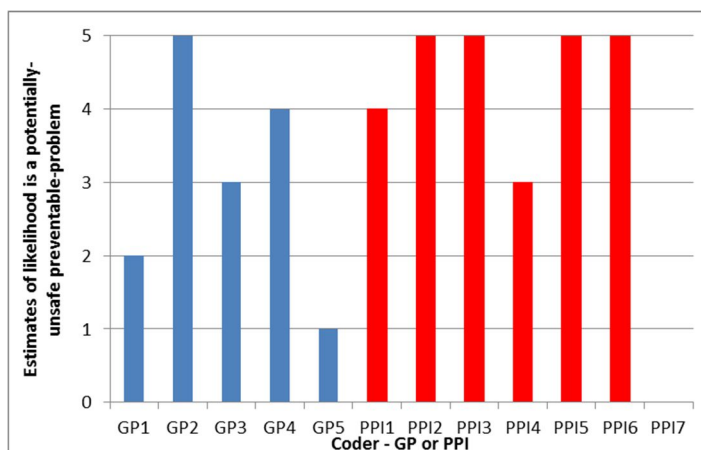

**Patient-reported prospect of harm:** prompted via Q10 (Box 1 main paper)

5=very likely or certain, 4=probably, 3=possibly, 2=unlikely, 1=definitely not, 0 = insufficient information or don't know

**Patient-perspective problem-type code:** C1.3.3 Wrong or inadequate advice about drug effects or how to use

**Scenario296. GP surgery**

**Briefly describe the mistake or problem and how it happened.** *"Poor diabetic annual review, foot check not correctly done just tested my foot pulses and nothing else"*

**Could the mistake or problem have been avoided? If so how?** *"Better training of staff"*

**Were you able to talk about the mistake or problem with anybody working in the primary care service?** *"No, had the opportunity but did not feel comfortable to discuss the mistake or problem"*

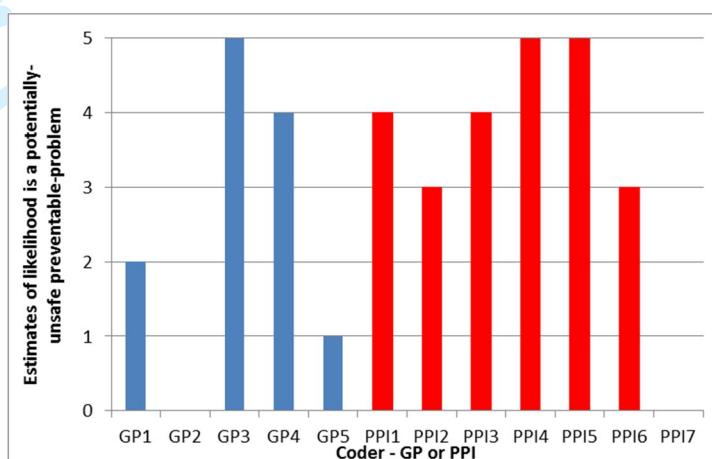

**Patient-reported prospect of harm:** suspected your health has been made worse by a problem or error that could have been prevented

5=very likely or certain, 4=probably, 3=possibly, 2=unlikely, 1=definitely not, 0 = insufficient information or don't know

**Patient-perspective problem-type code:** E2. Procedure was not carried out correctly

**Scenario239. GP surgery**

**Briefly describe the mistake or problem and how it happened.** *“Prior to a pain killing injection into my knee, I asked the GP who suggested the injection AND the GP who carried out the injection whether, as someone living with Type 1 diabetes, it would have any effect on my blood glucose levels. On both occasions, I was given an unequivocal No . In the event, within a few hours of the injection, my blood glucose rose significantly and remained high for several days. I felt unable to eat anything for 24 hours while I took on more and more insulin in order to bring my glucose levels down - I did not want to go to sleep that night simply because of the massive amount of insulin in my system.”*

**Could the mistake or problem have been avoided? If so how?** *“Yes. I feel that both GPs should have a knowledge about the side effects of drugs they prescribe, administer and recommend.”*

**Were you able to talk about the mistake or problem with anybody working in the primary care service?** *“No I could not find anybody with whom I could discuss the mistake or problem”*

**Patient-reported prospect of harm:** your health has been made worse by a problem or error that could have been prevented

**Patient-perspective problem-type code:** E3. Incorrect advice/no advice given by clinician

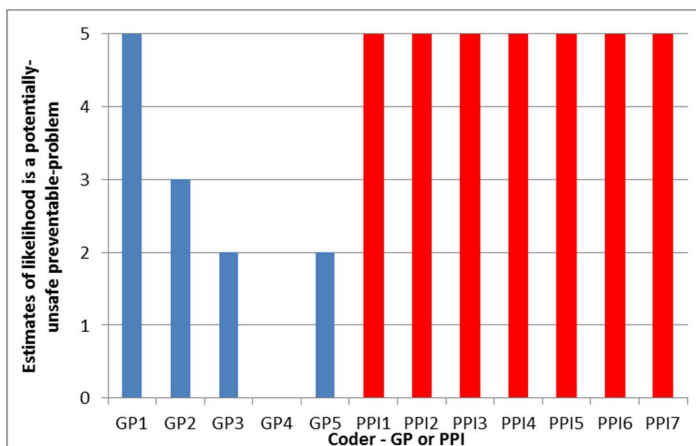

5=very likely or certain, 4=probably, 3=possibly, 2=unlikely, 1=definitely not, 0 = insufficient information or don't know

**Scenario87. GP surgery**

**Briefly describe the mistake or problem and how it happened.** *“GP completely overlooked symptoms and prescribed antibiotic after antibiotic without investigation or referral”*

**Could the mistake or problem have been avoided? If so how?** *“Yes by listening to history of complaints, carrying out appropriate tests instead of just giving antibiotics”*

**Were you able to talk about the mistake or problem with anybody working in the primary care service?** *“No I did not notice the mistake or problem at the time”*

**Patient-reported prospect of harm:** prompted via Q10 (Box 1 main paper)

**Patient-perspective problem-type code:** D1. Clinician seemed to lack interest in the patient's health problem or did not listen carefully enough; F1. Wrong/late/missed/delayed diagnosis

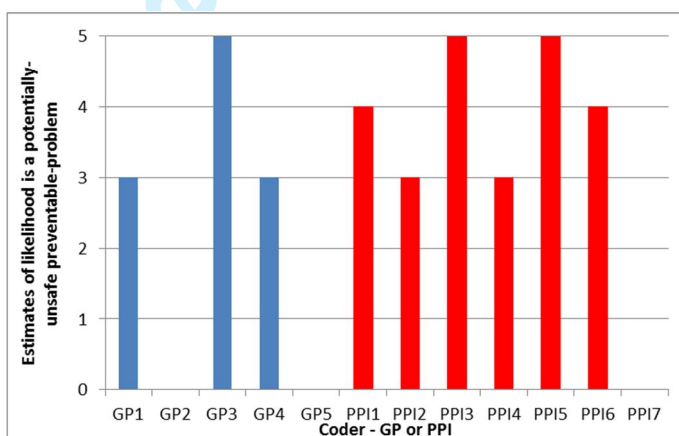

5=very likely or certain, 4=probably, 3=possibly, 2=unlikely, 1=definitely not, 0 = insufficient information or don't know

**Scenario294. GP surgery**

**Briefly describe the mistake or problem and how it happened.** *“Several times prescriptions have been incorrectly issued due to similar names for drugs or the same name with different strengths”*

**Could the mistake or problem have been avoided? If so how?** *“Yes, by more accurate or double data entry. Now solved by self-request using web systems.”*

**Were you able to talk about the mistake or problem with anybody working in the primary care service?** *“Yes, they did not want to know or seem to care unless a formal complaint was made”*

**Patient-reported prospect of harm:** your health has been made worse by a problem or error that could have been prevented

**Patient-perspective problem-type code:** C1.1.5 Repeat prescription unintentionally changed

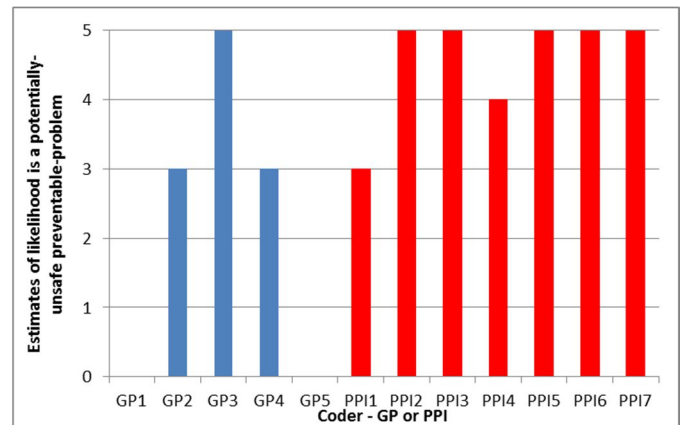

5=very likely or certain, 4=probably, 3=possibly, 2=unlikely, 1=definitely not, 0 = insufficient information or don't know

**Scenario327. GP surgery**

**Briefly describe the mistake or problem and how it happened.** *“A simple error occurred with an incorrect prescription. When I tried to bring this to the attention of the receptionist she treated me with disdain and in a challenging manner. She then proceeded to start to read my notes aloud in the public reception area. I felt that this was unacceptable behaviour. When I tried to tackle the receptionist about her behaviour I felt as if I was under threat. It caused me to feel very stressed, frustrated and ill tempered.”*

**Could the mistake or problem have been avoided? If so how?** *“If the receptionist had been willing to listen to what I was saying.”*

**Were you able to talk about the mistake or problem with anybody working in the primary care service?** *“I did speak to a lady who said she was the practice manager but I felt that they were not interested in resolving the problem”*

**Patient-reported prospect of harm:** suspected your health has been made worse by a problem or error that could have been prevented

**Patient-perspective problem-type code:** D3. Communication problem between patient and primary care staff; C1 Medication error not otherwise specified /other problem

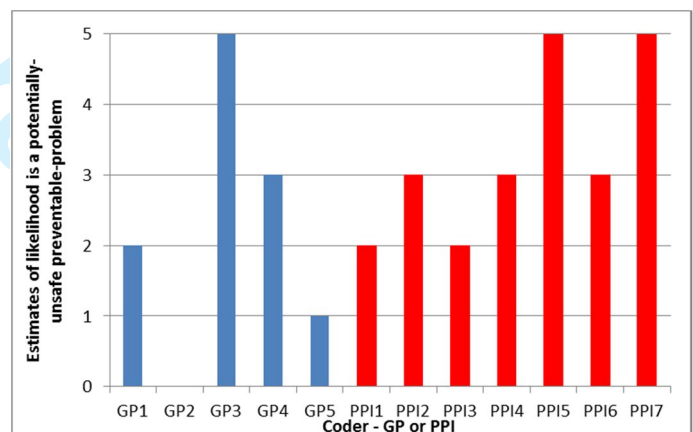

5=very likely or certain, 4=probably, 3=possibly, 2=unlikely, 1=definitely not, 0 = insufficient information or don't know

**Scenario330. GP Surgery**

**Briefly describe the mistake or problem and how it happened.**

*“Went to see GP because I feared the pain in one of my legs may have been Peripheral Artery Disease - hardening of the arteries, having had a (non-blood) relative who suffered from this and subsequently died - of a heart attack. Oh yes, said the GP, well, you will have it won't you? Why? I asked expecting her to say eg because you are a smoker, or maybe my age (65) or something else I wasn't aware of. But what she actually told me was 'Because you are a diabetic!' Whaaat? I exclaimed - you mean ALL diabetics will inevitably get this, and there's no way to prevent it? Yes she said and shrugged. I said 'Thanks for nothing then' and left. Instead I left, came home and went straight on-line to make an appointment with someone more sensible, which I did and after taking my leg/ankle pulses and BPs etc - he chatted to me and said he would refer me for a cardiology consultation at the hospital. This IS what I expected in the first place and now it IS being taken care of.”*

**Could the mistake or problem have been avoided? If so how?** *“By training the GP properly in the first place”*

**Were you able to talk about the mistake or problem with anybody working in the primary care service?** *“I explained to GP 2 But I don't know what if anything was done about it, or how I could find that out.”*

**Patient-reported prospect of harm:** your health has been made worse by a problem or error that could have been prevented

**Patient-perspective problem-type code:** D1. Clinician seemed to lack interest in the patient’s health problem or did not listen carefully enough

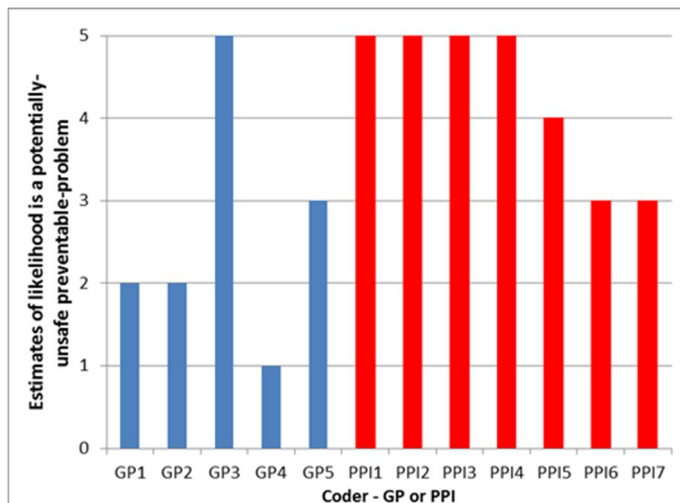

5=very likely or certain, 4=probably, 3=possibly, 2=unlikely, 1=definitely not, 0 = insufficient information or don't know

1  
2  
3  
4  
5  
6  
7  
8  
9  
10  
11  
12  
13  
14  
15  
16  
17  
18  
19  
20  
21  
22  
23  
24  
25  
26  
27  
28  
29  
30  
31  
32  
33  
34  
35  
36  
37  
38  
39  
40  
41  
42  
43  
44  
45  
46  
47  
48  
49  
50  
51  
52  
53  
54  
55  
56  
57  
58  
59  
60

Patient reported scenarios occurring during the past 12 months that PPIs scored as higher likelihood to be a potentially-unsafe preventable-problem in primary care compared with GPs – pilot survey

### Scenario3/179. GP Surgery

**Briefly describe the mistake or problem and how it happened.** *“I had a severe reaction to Atorvastatin after a dose increase so much so that I was almost immobile and took 4 months to recover”*

**Could the mistake or problem have been avoided? If so how?** *“According to guidelines I should have been on the increased dose - it took a long time to convince the GP that I needed blood tests to find out why I couldn't walk. My GP was very hesitant to admit that I did have a reaction to statins.”*

**Were you able to talk about the mistake or problem with anybody working in the primary care service?** *“No I could not find anybody with whom I could discuss the mistake or problem. It was not really the GPs fault per se, just took a lot of convincing that there was a problem”*

**Patient-reported prospect of harm:** health could have been made worse had someone not noticed a problem or error

**Patient-perspective problem-type code:** C1.1.3 Long term or continued prescribing without review or consideration of long term or side effects

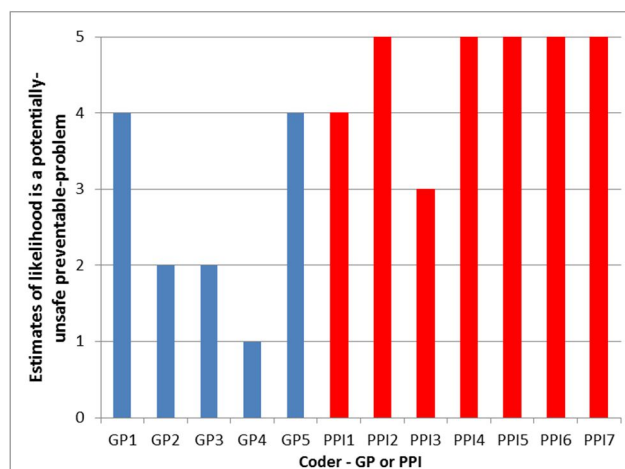

5=very likely or certain, 4=probably, 3=possibly, 2=unlikely, 1=definitely not, 0 = insufficient information or don't know

**Scenario3/285. GP Surgery**

**Briefly describe the mistake or problem and how it happened.** *“Doctor kept saying I had vitamin deficiency B1, it turned out I had peripheral neuropathy which is very painful”*

**Could the mistake or problem have been avoided? If so how?** *“I just needed the proper medication to help”*

**Were you able to talk about the mistake or problem with anybody working in the primary care service?** *“Just saw another Doctor and she knew straight away what the problem was - she was experienced with Diabetic problems. Yes had the opportunity but did not feel comfortable to discuss the mistake or problem”*

**Patient-reported prospect of harm:** prompted via Q10 (Box 1 main paper)

**Patient-perspective problem-type code:** F1. Wrong/late/missed/delayed diagnosis

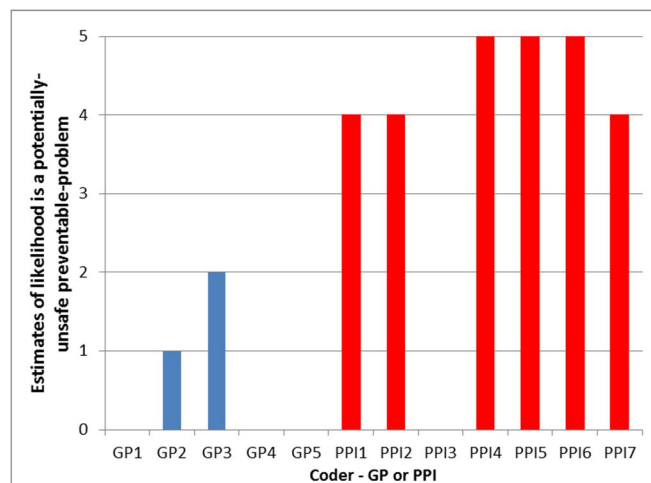

5=very likely or certain, 4=probably, 3=possibly, 2=unlikely, 1=definitely not, 0 = insufficient information or don't know

**Scenario3/347. GP Surgery**

**Briefly describe the mistake or problem and how it happened.** *“Incapable diabetic doctor trying to take blood out the back of my hand haphazardly, not listening and resulting in me fitting and the student watching having to get help.”*

**Could the mistake or problem have been avoided? If so how?** *“Yes. By listening to me”*

**Were you able to talk about the mistake or problem with anybody working in the primary care service?** *“No I could not find anybody with whom I could discuss the mistake or problem”*

**Patient-reported prospect of harm:** prompted via Q10 (Box 1 main paper)

**Patient-perspective problem-type code:** E2.

Procedure was not carried out correctly; D1. Clinician seemed to lack interest in the patient's health problem or did not listen carefully enough

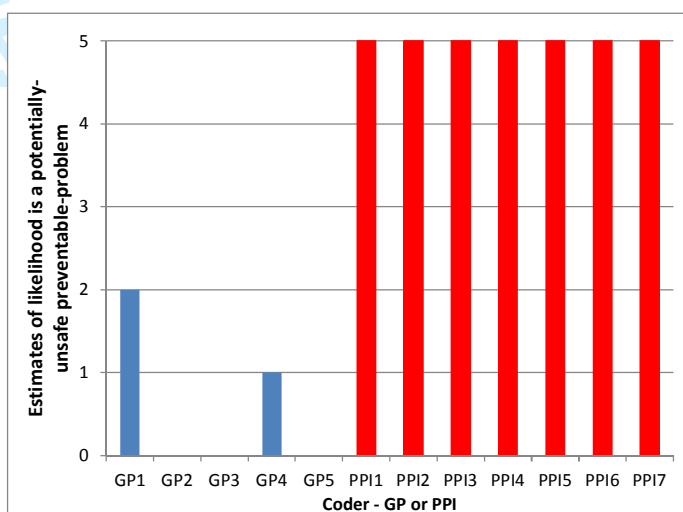

5=very likely or certain, 4=probably, 3=possibly, 2=unlikely, 1=definitely not, 0 = insufficient information or don't know

**Scenario3/384. Dental Surgery**

**Briefly describe the mistake or problem and how it happened.** *"I had an infection under my wisdom tooth. They agreed that the only way to solve the problem was to take the tooth out. They gave me an appointment to do this in 6 weeks. I am a type 1 diabetic and the infection was affecting my blood sugars and I was concerned that I would have to go to A&E if my blood sugars continued to rise due to the infection. It would have affected my health if I had not paid to go to a private dentist."*

**Could the mistake or problem have been avoided? If so how?** *"They could have taken out the tooth straight away. I was happy to wait at the emergency dentist for them to do this."*

**Were you able to talk about the mistake or problem with anybody working in the primary care service?** *"I explained but they said I would have to wait. They also asked if I needed a sugary drink when I said that my sugars were high so I was too scared to eat and had not eaten in 12hrs. It was clear they didn't understand diabetes."*

**Patient-reported prospect of harm:** health could have been made worse had someone not noticed a problem or error

**Patient-perspective problem-type code:** A5. Unable to get an appointment/other problems with making appointment

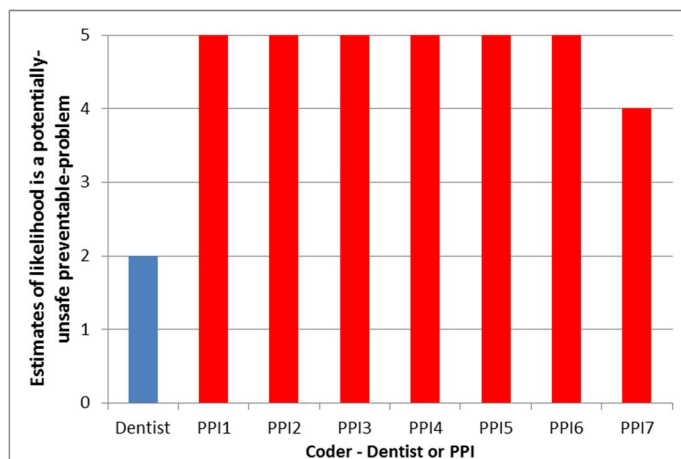

5=very likely or certain, 4=probably, 3=possibly, 2=unlikely, 1=definitely not, 0 = insufficient information or don't know

**Scenario3/366. Dental Surgery**

**Briefly describe the mistake or problem and how it happened.** *"Caries, cavities and problem with crown not diagnosed or treated"*

**Could the mistake or problem have been avoided? If so how?** *"Better dentist & not working to tight time-scale imposed by company owning dental surgery"*

**Were you able to talk about the mistake or problem with anybody working in the primary care service?** *"No I could not find anybody with whom I could discuss the mistake or problem"*

**Patient-reported prospect of harm:** prompted via Q10 (Box 1 main paper)

**Patient-perspective problem-type code:** C3. Problem with dental treatment or diagnosis

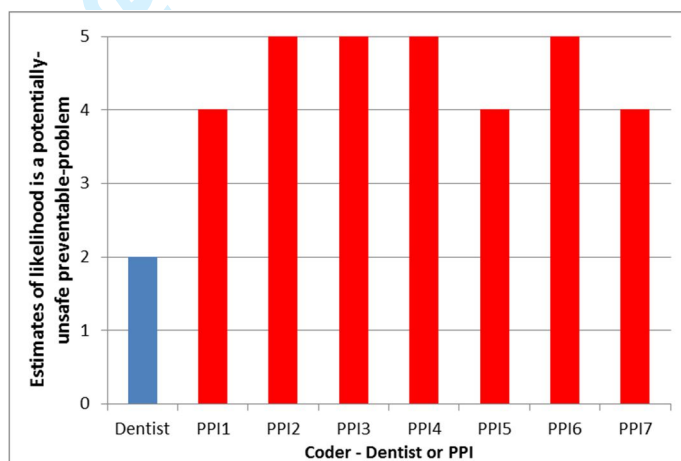

5=very likely or certain, 4=probably, 3=possibly, 2=unlikely, 1=definitely not, 0 = insufficient information or don't know

**Scenario3/458. GP Surgery**

**Briefly describe the mistake or problem and how it happened.** *“Using the summary on discharge from hospital, one GP transcribed incorrectly on to my electronic notes ie size of ovarian cyst was 7.5cms and he put 7.5 mms. Another GP requested diagnostic bone density scan but either forgot or did not record it and she ended up questioning why I had it and who requested it. She also referred me for an orthopedic consultation then said I was not funded for the steroid injection put into my swollen elbows.”*

**Could the mistake or problem have been avoided? If so how?** *“Yes”*

**Were you able to talk about the mistake or problem with anybody working in the primary care service?** *“I was too scared to discuss my concerns for fear of being labelled a trouble maker”*

**Patient-reported prospect of harm:** health could have been made worse had someone not noticed a problem or error

**Patient-perspective problem-type code:** A2. Incorrect notes/inadequate notes/notes not kept up to date

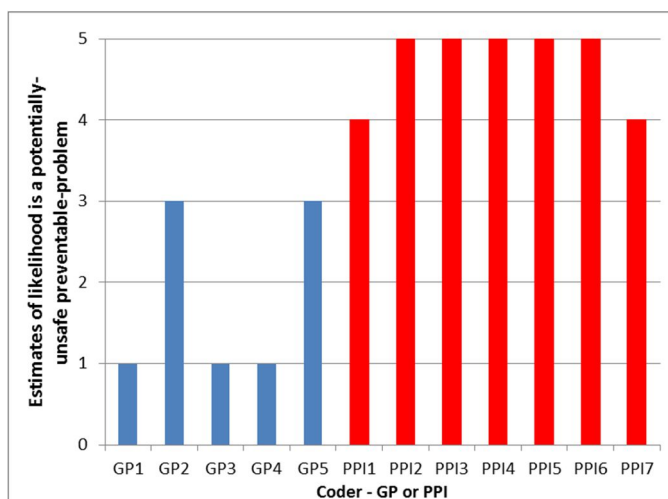

5=very likely or certain, 4=probably, 3=possibly, 2=unlikely, 1=definitely not, 0 = insufficient information or don't know

**Scenario3/484. GP Surgery**

**Briefly describe the mistake or problem and how it happened.** *“GP prescribed pills, but then got phone call saying not to take them”*

**Could the mistake or problem have been avoided? If so how?** *“Not sure”*

**Were you able to talk about the mistake or problem with anybody working in the primary care service?** *“No I was not concerned about the problem”*

**Patient-reported prospect of harm:** prompted via Q10 (Box 1 main paper)

**Patient-perspective problem-type code:** C1. Medication problem

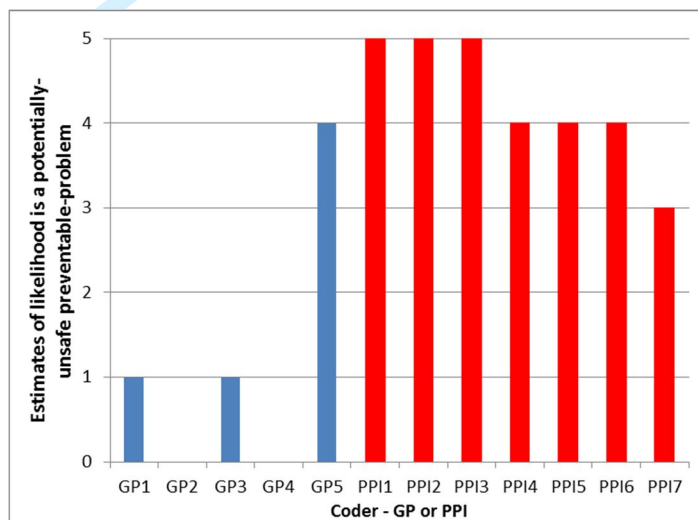

5=very likely or certain, 4=probably, 3=possibly, 2=unlikely, 1=definitely not, 0 = insufficient information or don't know



**Scenario3/555. GP Surgery**

**Briefly describe the mistake or problem and how it happened.** *"I had a burst appendix and peritonitis, something that even a scan couldn't detect adequately. My first visit to GP was when I said I think I have appendicitis, no other symptoms only the pain. It was ten days before seeing a consultant, a further 10 days to have a scan, then 2 weeks to be told that I had a lump on my colon which is what my GP had said 5 weeks previously. It was a further 2 weeks before I had surgery."*

**Could the mistake or problem have been avoided? If so how?** *"If my GP had referred me for a scan immediately it would have saved 3 weeks out of the seven. It was two weeks from scan to results and I hear that is usual, but they're not looking at them for 2 weeks"*

**Were you able to talk about the mistake or problem with anybody working in the primary care service?** *"Had the outcome been different my widow might have pursued the matter further. The system is at fault rather than any individual."*

**Patient-reported prospect of harm:** your health has been made worse by a problem or error that could have been prevented

**Patient-perspective problem-type code:** B5. Not referred when patient felt was needed

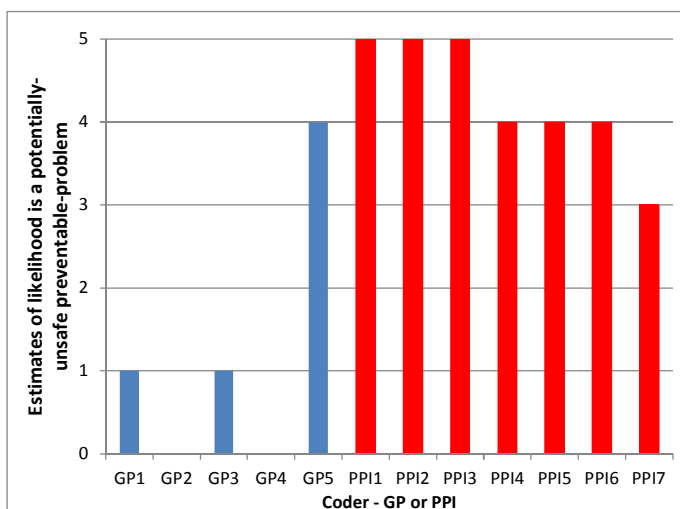

5=very likely or certain, 4=probably, 3=possibly, 2=unlikely, 1=definitely not, 0 = insufficient information or don't know

STROBE Statement—Checklist of items that should be included in reports of *cross-sectional studies*

|                              | Item No | Recommendation                                                                                                                                                                                                                                                                                                                                                                                                                                                                                         |
|------------------------------|---------|--------------------------------------------------------------------------------------------------------------------------------------------------------------------------------------------------------------------------------------------------------------------------------------------------------------------------------------------------------------------------------------------------------------------------------------------------------------------------------------------------------|
| <b>Title and abstract</b>    | 1       | (a) Indicate the study's design with a commonly used term in the title or the abstract<br>Yes p1                                                                                                                                                                                                                                                                                                                                                                                                       |
|                              |         | (b) Provide in the abstract an informative and balanced summary of what was done and what was found yes p2                                                                                                                                                                                                                                                                                                                                                                                             |
| <b>Introduction</b>          |         |                                                                                                                                                                                                                                                                                                                                                                                                                                                                                                        |
| Background/rationale         | 2       | Explain the scientific background and rationale for the investigation being reported<br>Yes p3                                                                                                                                                                                                                                                                                                                                                                                                         |
| Objectives                   | 3       | State specific objectives, including any prespecified hypotheses yes p3-4                                                                                                                                                                                                                                                                                                                                                                                                                              |
| <b>Methods</b>               |         |                                                                                                                                                                                                                                                                                                                                                                                                                                                                                                        |
| Study design                 | 4       | Present key elements of study design early in the paper yes p4                                                                                                                                                                                                                                                                                                                                                                                                                                         |
| Setting                      | 5       | Describe the setting, locations, and relevant dates, including periods of recruitment, exposure, follow-up, and data collection yes p4                                                                                                                                                                                                                                                                                                                                                                 |
| Participants                 | 6       | (a) Give the eligibility criteria, and the sources and methods of selection of participants yes p4                                                                                                                                                                                                                                                                                                                                                                                                     |
| Variables                    | 7       | Clearly define all outcomes, exposures, predictors, potential confounders, and effect modifiers. Give diagnostic criteria, if applicable yes box 1, online appendix 1                                                                                                                                                                                                                                                                                                                                  |
| Data sources/<br>measurement | 8*      | For each variable of interest, give sources of data and details of methods of assessment (measurement). Describe comparability of assessment methods if there is more than one group yes p5, online appendix 1                                                                                                                                                                                                                                                                                         |
| Bias                         | 9       | Describe any efforts to address potential sources of bias yes p4                                                                                                                                                                                                                                                                                                                                                                                                                                       |
| Study size                   | 10      | Explain how the study size was arrived at n/a as is a pilot study.                                                                                                                                                                                                                                                                                                                                                                                                                                     |
| Quantitative variables       | 11      | Explain how quantitative variables were handled in the analyses. If applicable, describe which groupings were chosen and why yes p5, table2                                                                                                                                                                                                                                                                                                                                                            |
| Statistical methods          | 12      | (a) Describe all statistical methods, including those used to control for confounding yes p5<br>(b) Describe any methods used to examine subgroups and interactions, yes just chi2 tests p5<br>(c) Explain how missing data were addressed all missing data is listed in the tables so it is completely transparent how this was dealt with, there were few missing data<br>(d) If applicable, describe analytical methods taking account of sampling n/a<br>(e) Describe any sensitivity analyses n/a |
| <b>Results</b>               |         |                                                                                                                                                                                                                                                                                                                                                                                                                                                                                                        |
| Participants                 | 13*     | (a) Report numbers of individuals at each stage of study—eg numbers potentially eligible, examined for eligibility, confirmed eligible, included in the study, completing follow-up, and analysed yes online appendix 1<br>(b) Give reasons for non-participation at each stage yes online appendix 1<br>(c) Consider use of a flow diagram yes online appendix 1                                                                                                                                      |
| Descriptive data             | 14*     | (a) Give characteristics of study participants (eg demographic, clinical, social) and information on exposures and potential confounders yes table 1<br>(b) Indicate number of participants with missing data for each variable of interest yes all tables                                                                                                                                                                                                                                             |
| Outcome data                 | 15*     | Report numbers of outcome events or summary measures yes all tables                                                                                                                                                                                                                                                                                                                                                                                                                                    |
| Main results                 | 16      | (a) Give unadjusted estimates and, if applicable, confounder-adjusted estimates and their precision (eg, 95% confidence interval). Make clear which confounders were                                                                                                                                                                                                                                                                                                                                   |

|                          |    |                                                                                                                                                                                            |
|--------------------------|----|--------------------------------------------------------------------------------------------------------------------------------------------------------------------------------------------|
|                          |    | adjusted for and why they were included <b>yes table 3</b>                                                                                                                                 |
|                          |    | (b) Report category boundaries when continuous variables were categorized <b>yes all tables</b>                                                                                            |
|                          |    | (c) If relevant, consider translating estimates of relative risk into absolute risk for a meaningful time period <b>not appropriate as pilot study with self-selected sample</b>           |
| Other analyses           | 17 | Report other analyses done—eg analyses of subgroups and interactions, and sensitivity analyses <b>table 6 considers demographics for problems more likely to be a potentially harmful.</b> |
| <b>Discussion</b>        |    |                                                                                                                                                                                            |
| Key results              | 18 | Summarise key results with reference to study objectives <b>yes p7</b>                                                                                                                     |
| Limitations              | 19 | Discuss limitations of the study, taking into account sources of potential bias or imprecision. Discuss both direction and magnitude of any potential bias <b>yes p8</b>                   |
| Interpretation           | 20 | Give a cautious overall interpretation of results considering objectives, limitations, multiplicity of analyses, results from similar studies, and other relevant evidence <b>yes p7-8</b> |
| Generalisability         | 21 | Discuss the generalisability (external validity) of the study results <b>yes p8, not generalisable</b>                                                                                     |
| <b>Other information</b> |    |                                                                                                                                                                                            |
| Funding                  | 22 | Give the source of funding and the role of the funders for the present study and, if applicable, for the original study on which the present article is based <b>yes p9</b>                |

\*Give information separately for exposed and unexposed groups.

**Note:** An Explanation and Elaboration article discusses each checklist item and gives methodological background and published examples of transparent reporting. The STROBE checklist is best used in conjunction with this article (freely available on the Web sites of PLoS Medicine at <http://www.plosmedicine.org/>, Annals of Internal Medicine at <http://www.annals.org/>, and Epidemiology at <http://www.epidem.com/>). Information on the STROBE Initiative is available at [www.strobe-statement.org](http://www.strobe-statement.org).

# BMJ Open

## Development and piloting of a survey to estimate the frequency and nature of potentially-harmful preventable problems in primary care from a UK patient's perspective

|                                 |                                                                                                                                                                                                                                                                                                                                                                                                                                                                                                                                                                                                                                                                                                                                                                                                                                                                                                                                                                                           |
|---------------------------------|-------------------------------------------------------------------------------------------------------------------------------------------------------------------------------------------------------------------------------------------------------------------------------------------------------------------------------------------------------------------------------------------------------------------------------------------------------------------------------------------------------------------------------------------------------------------------------------------------------------------------------------------------------------------------------------------------------------------------------------------------------------------------------------------------------------------------------------------------------------------------------------------------------------------------------------------------------------------------------------------|
| Journal:                        | <i>BMJ Open</i>                                                                                                                                                                                                                                                                                                                                                                                                                                                                                                                                                                                                                                                                                                                                                                                                                                                                                                                                                                           |
| Manuscript ID                   | bmjopen-2017-017786.R1                                                                                                                                                                                                                                                                                                                                                                                                                                                                                                                                                                                                                                                                                                                                                                                                                                                                                                                                                                    |
| Article Type:                   | Research                                                                                                                                                                                                                                                                                                                                                                                                                                                                                                                                                                                                                                                                                                                                                                                                                                                                                                                                                                                  |
| Date Submitted by the Author:   | 03-Aug-2017                                                                                                                                                                                                                                                                                                                                                                                                                                                                                                                                                                                                                                                                                                                                                                                                                                                                                                                                                                               |
| Complete List of Authors:       | Stocks, Susan; University of Manchester, GM Patient Safety Translational Research Centre<br>Donnelly, Ailsa; University of Manchester, PRIMER<br>Esmail, Aneez; University of Manchester, School of Primary Care<br>Beresford, Joanne; Research User Group (RUG) of the NIHR Greater Manchester Primary Care Patient Safety Translational Research Centre<br>Gamble, Carolyn; University of Manchester, GM Patient Safety Translational Research Centre<br>Luty, Sarah; NHS Scotland<br>Deacon, Richard; St Gabriels Medical Centre<br>Danczak, Avril; Central and South Manchester Specialty Training Programme for General Practice<br>Mann, Nicola; University of Manchester, GMPSTRC<br>Townsend, David; University of Manchester, GM Patient Safety Translational Research Centre<br>Ashley, James; Division of Dentistry, School of Medical Sciences, University of Manchester<br>Bowie, Paul; NHS Scotland<br>Campbell, Stephen; University of Manchester, Centre for Primary Care |
| <b>Primary Subject Heading</b>: | Research methods                                                                                                                                                                                                                                                                                                                                                                                                                                                                                                                                                                                                                                                                                                                                                                                                                                                                                                                                                                          |
| Secondary Subject Heading:      | General practice / Family practice, Health services research, Communication, Dentistry and oral medicine                                                                                                                                                                                                                                                                                                                                                                                                                                                                                                                                                                                                                                                                                                                                                                                                                                                                                  |
| Keywords:                       | STATISTICS & RESEARCH METHODS, PRIMARY CARE, Quality in health care < HEALTH SERVICES ADMINISTRATION & MANAGEMENT                                                                                                                                                                                                                                                                                                                                                                                                                                                                                                                                                                                                                                                                                                                                                                                                                                                                         |
|                                 |                                                                                                                                                                                                                                                                                                                                                                                                                                                                                                                                                                                                                                                                                                                                                                                                                                                                                                                                                                                           |

SCHOLARONE™  
Manuscripts

1  
2  
3 1 Development and piloting of a survey to estimate the frequency and nature of potentially-harmful  
4 2 preventable-problems in primary care from a UK patient's perspective  
5  
6 3

7  
8 4 S Jill Stocks *research fellow*<sup>1</sup>, Ailsa Donnelly *public and patient involvement volunteer*<sup>2</sup>, Aneez Esmail  
9 5 *professor*<sup>1</sup>, Joanne Beresford *public and patient involvement volunteer*<sup>2</sup> Carolyn Gamble *public and*  
10 6 *patient involvement volunteer*<sup>2</sup>, Sarah Luty *general practitioner*<sup>3</sup>, Richard Deacon *general*  
11 7 *practitioner*<sup>4</sup>, Avril Danczak *general practitioner*<sup>5</sup>, Nicola Mann *general practitioner*<sup>2</sup>, David Townsend  
12 8 *general practitioner*<sup>2</sup>, James Ashley *dentist*<sup>6</sup>, Paul Bowie *programme director*<sup>7,8</sup>, Stephen M Campbell  
13 9 *professor*<sup>1</sup>  
14  
15

16  
17 10  
18 11 1. NIHR Greater Manchester Primary Care Patient Safety Translational Research Centre, Centre for  
19 12 Primary Care, Division of Population Health, Health Services Research and Primary Care, University  
20 13 of Manchester, Manchester M13 9PL, UK

21 14 2. Research User Group (RUG) of the NIHR Greater Manchester Primary Care Patient Safety  
22 15 Translational Research Centre, Centre for Primary Care, Division of Population Health, Health  
23 16 Services Research and Primary Care, University of Manchester, Manchester M13 9PL, UK

24 17 3. General Practitioner NHS Greater Glasgow and Clyde, Medical Directorate, NHS Education for  
25 18 Scotland, Glasgow G3 8BW

26 19 4. St Gabriels Medical Centre, 4, Bishops Road, Prestwich, Manchester M25 0HT, UK

27 20 5. Central and South Manchester Specialty Training Programme for General Practice, Health  
28 21 Education England North West ( HEENWE) Education and Research Centre, Wythenshawe Hospital,  
29 22 Manchester M23 9LT, UK

30 23 6. Division of Dentistry, School of Medical Sciences, University of Manchester, Manchester M13 9PL,  
31 24 UK

32 25 7. Medical Directorate, NHS Education for Scotland, 2 Central Quay, Glasgow G3 8BW, UK.

33 26 8. Institute of Health and Wellbeing, University of Glasgow, Glasgow G12 0XH, UK  
34  
35  
36  
37  
38  
39  
40  
41  
42  
43  
44  
45  
46  
47  
48  
49  
50  
51  
52  
53  
54  
55  
56  
57  
58  
59  
60

30 Correspondence to [jill.stocks@manchester.ac.uk](mailto:jill.stocks@manchester.ac.uk)

32 Word count: 3541  
33

1  
2  
3 **1 Abstract**

4  
5 **2 Objectives:** To design and pilot a survey to be used at the population level to estimate the frequency  
6  
7 of patient-perceived potentially-harmful preventable-problems occurring in UK primary care. To  
8  
9 explore the nature of the problems, patient-suggested strategies for prevention and opinions of  
10  
11 clinicians and the public regarding the potential for harm

12  
13 **6 Design:** a survey was co-designed by three members of the public and one researcher and piloted  
14  
15 through public and patient involvement and engagement networks

16  
17 **8 Setting:** self-selected sample of the UK population

18  
19 **9 Participants:** 977 members of the public accessed the online survey during October and November  
20  
21 2015

22  
23 **11 Primary outcome measures:** respondent feedback about the ease of completion of the survey,  
24  
25 quality of responses in terms of review by clinicians and members of the public, preliminary  
26  
27 estimates of the frequency and nature of patient-perceived potentially-harmful problems occurring  
28  
29 in the last 12 months

30  
31 **15 Results:** 638 (65%) members of the public completed the survey and few respondents reported any  
32  
33 difficulty in understanding or completing the survey. 132 (21%) respondents reported experiencing a  
34  
35 potentially-harmful preventable-problem during the past 12 months and 108 (82%) of these  
36  
37 respondents provided a description that was adequate for at least one clinician to form an opinion  
38  
39 about the potentially-harmful problem. Respondents were older than the UK generally, more likely  
40  
41 to work or volunteer in the healthcare sector and tended to use primary care more frequently but  
42  
43 their confidence and trust in their own GP was similar to that of the UK population as measured by  
44  
45 the annual English GP patient survey.

46  
47 **23 Conclusions:** the survey was acceptable to patients and mostly provided data of sufficient quality for  
48  
49 review by clinicians and members of the public. It is now ready to use at a population level to  
50  
51 estimate the frequency and nature of potentially-harmful preventable-problems in primary care  
52  
53 from a patient's perspective.

54  
55 **28 Strengths and limitations of this study**

- 56  
57  
58  
59  
60
- We have designed and tested a survey to measure the frequency and nature of potentially-harmful preventable-problems in primary care from the patient's perspective
  - The survey was co-designed by three members of the public and piloted through extensive public and patient involvement
  - The patient-described scenarios were reviewed by primary care clinicians
  - The study respondents were self-selected through public and patient involvement and engagement groups
  - The survey is ready to be administered to a representative sample of the general population

## 1 Background

2  
3  
4  
5  
6  
7  
8  
9  
10  
11  
12  
13  
14  
15  
16  
17  
18  
19  
20  
21  
22  
23  
24  
25  
26  
27  
28  
29  
30  
31  
32  
33  
34  
35  
36  
37  
38  
39  
40  
41  
42  
43  
44  
45  
46  
47  
48  
49  
50  
51  
52  
53  
54  
55  
56  
57  
58  
59  
60

1 Patients are thought to take a different view of patient safety to healthcare professionals. (1) They  
2 tend to view safety in terms of the overall balance of benefit and harm over time whereas  
3 healthcare professionals often see high quality healthcare occasionally punctuated by safety  
4 incidents and adverse events.(2) Furthermore patients hold may different opinions about how to  
5 improve patient safety (3, 4) or different priorities to clinicians, for example identifying psychological  
6 and emotional harm rather than technical errors.(5) Involving patients in identifying errors and  
7 reducing harm occurs in secondary care (6) but patient reported outcomes can show poor  
8 concordance between patients and clinicians, for example, in reporting adverse symptom events in  
9 the context of drug safety.(7) Nonetheless patients are thought to be capable of reporting medical  
10 errors accurately. (6, 8) Involving patients is advocated as a way to improve safety (9) and this  
11 approach would be facilitated through patients and professionals having an understanding each  
12 other's expectations and priorities.

13  
14  
15  
16  
17  
18  
19  
20  
21  
22  
23  
24  
25  
26  
27  
28  
29  
30  
31  
32  
33  
34  
35  
36  
37  
38  
39  
40  
41  
42  
43  
44  
45  
46  
47  
48  
49  
50  
51  
52  
53  
54  
55  
56  
57  
58  
59  
60

16 Studies that quantify patient safety problems in primary care are uncommon and incidence  
17 estimates from record review or incident reporting by clinicians range from less than 1 to 24 per 100  
18 consultations or record review.(10-12) The National Reporting and Learning System (NRLS) in  
19 England and Wales records patient safety incidents reported by healthcare professionals; only 1% of  
20 these reports originate from primary care (13) which likely reflects under-reporting.(14, 15) Still  
21 fewer studies have quantified patient safety problems in primary care from the patient's  
22 perspective. (16) A 2013 European survey of the UK public reported that 43% of respondents felt  
23 that it was "likely" that patients could be harmed by non-hospital healthcare, an increase from 37%  
24 in 2009.(17) In Norway a population-level survey found that the patient-reported lifetime probability  
25 of ever experiencing an adverse event was 10%, of which around two thirds of respondents  
26 attributed the cause of their event as their general practitioner (GP).(4) In Spain a telephone survey  
27 of patients estimated that around 7% of patients experienced a self-reported adverse event during a  
28 1 year period. (18) A USA practice-based website observed an incidence rate of patient-reported  
29 adverse events of 1.4% over 2 years.(19) Data from the UK is sparse; this may be partly due to the  
30 lack of a valid and reliable instrument to make a comprehensive measurement of safety in primary  
31 care.(20) The PREOS-PC should help to address this knowledge gap.(21, 22)

32  
33  
34  
35  
36  
37  
38  
39  
40  
41  
42  
43  
44  
45  
46  
47  
48  
49  
50  
51  
52  
53  
54  
55  
56  
57  
58  
59  
60

33 We aimed to design and pilot a survey to be used at the population level to estimate the frequency  
34 of patient-perceived potentially-harmful preventable-problems occurring in UK primary care. We  
35 relied on public and patient involvement (PPI) provided by the Greater Manchester Primary Care  
36 Patient Safety Translational Research Centre Research User Group (GMPSTRC RUG, 23) from the  
37 outset in order to ensure that our survey was easily understood by the public. We also aimed to  
38 explore the nature of the problems, patient-suggested strategies for prevention and differences in  
39 opinion between primary care clinicians and the public regarding the potential for harm in the  
40 patient-described scenarios. The study was conceived, designed and implemented by a team of  
41 three members of the public and one researcher. Primary care professionals provided their opinions  
42 after collection of the data. The specific aims of the study were to:

- 43  
44  
45  
46  
47  
48  
49  
50  
51  
52  
53  
54  
55  
56  
57  
58  
59  
60
1. co-design with PPI partners and pilot a survey asking about problems occurring in primary care  
that caused, or had the potential to cause, preventable harm as perceived by patients

1  
2  
3 1 2. examine the potential of the survey to describe the type of patient-perceived problems reported,  
4 2 describe the demographics of the patients reporting a problem, the primary care service involved,  
5 3 with whom in the primary care service the problem was discussed (if it was) and patient suggestions  
6 4 as to how it might have been prevented.

7  
8 5 3. examine the potential of the survey to compare the opinions of the reporting patient, members of  
9 6 the public and clinicians as to the likelihood the scenario describes a potentially-harmful  
10 7 preventable-problem.

## 11 8 12 9 Methods

### 13 10 14 11 Designing and piloting of the survey

15 12 Our aim was to design a survey asking about problems occurring in primary care that caused, or had  
16 13 the potential to cause, preventable harm as perceived by patients that was easily understood and  
17 14 free from jargon. Currently there is no well-established terminology for asking such a question.(8)  
18 15 The process began with a discussion between three members of the GMPSTRC RUG (AD, JB, CG) and  
19 16 one academic researcher (SJS). Questions used in previous surveys addressing a similar question (4,  
20 17 17-19) were shared among the project team and used to generate several candidate questions.  
21 18 These questions were then discussed privately among the project team's friends and family and  
22 19 within the project team (SJS, AD, JB, CG). The discussion was facilitated by making the candidate  
23 20 questions available online. After two iterations of this process the survey (Box 1 & Box A online  
24 21 Appendix 1) was piloted online through newsletters or group mailings of several PPI and public  
25 22 engagement networks during November and December 2015. These networks were the associate  
26 23 GMPSTRC RUG, the Public Programmes team at Central Manchester Foundation Trust, the Citizen  
27 24 Scientist project, the Primary Care Research in Manchester Engagement Resource, North West  
28 25 People in Research Forum and HelpBeatDiabetes volunteers (Details of these groups and networks  
29 26 are provided in Box B, online Appendix 1).

30 27  
31 28 The first question (Q1 Box 1) was taken from the English GP patient survey in order to compare the  
32 29 overall level of confidence and trust in their GP among the survey respondents with that across  
33 30 England.(24) The second question (Q2 Box 1) is the main screening question, those responding  
34 31 negatively to Q2 (*i.e.* not experienced a preventable-problem) were directed to a more specific  
35 32 question with a list of commonly understood patient safety events (Q10 Box A, online Appendix 1). If  
36 33 this prompted recognition of experiencing a potentially-harmful preventable-problem they were  
37 34 returned to Q4 (Box1). The rationale behind this approach was that the screening question (Q2 Box  
38 35 1) should be non-leading and encourage the respondents to describe their preventable-problems  
39 36 through the subsequent questions without the suggestion that inevitably occurs following a list of  
40 37 possible potentially-harmful preventable-problems. However if the respondent did not believe that  
41 38 they had experienced a potentially-harmful preventable-problem then the prompt question (Q10,  
42 39 Box 1) would ensure that this was the case and also test the sensitivity of Q2 (Box 1). The option to  
43 40 answer on behalf of a friend or relative was offered to those who had not a personal experience to  
44 41 report. This was to ensure sufficient responses to adequately test the questionnaire but also to  
45 42 discourage respondents from answering with another person's experience as their own.  
46 43 Respondents were also asked whether they worked or volunteered in the healthcare profession and  
47 44 to comment on the ease of completion of the questionnaire.  
48 45



1  
2  
3 1 Coding of reported events  
4

5 2 Type of problem

6 3 The nature of the problem in each described scenario was coded at face value, *i.e.* as the patient  
7 4 described without further interpretation, by one author (SJS) and checked by a second author (JA for  
8 5 dental scenarios, PB for all other scenarios). A bottom-up (inductive) approach was used to identify  
9 6 similar topics which were coded then cross-matched to an existing taxonomy for errors in general  
10 7 practice (25, 26) (Table A, online Appendix 1). All the new codes matched the existing taxonomy  
11 8 within the higher two levels and the medication-related scenarios were coded to a finer level (Table  
12 9 B, online Appendix 1).  
13  
14  
15

16 11 Likelihood the scenario described a potentially-harmful preventable-problem

17 12 Five GPs, one dentist and seven members of the public estimated the likelihood that, in their  
18 13 opinion, each patient-described scenario was a potentially-harmful preventable-problem. Brief  
19 14 biographies of the coders are provided in Table C, online Appendix 1. Some examples of the  
20 15 information provided to the coders are shown in boxes 1-23 in online Appendix 2 and consisted of  
21 16 the responses to Q5 to Q9 (Box 1). They were not given any demographic information or the  
22 17 patient's estimate of the impact on their health (Q4, Box 1). Coders were asked to score each  
23 18 scenario from very likely (5) to definitely not (1) in response to the question "*How likely do you think*  
24 19 *it is the patient was correct in thinking that their health might be worsened, or actually was made*  
25 20 *worse, because of a mistake or a problem in primary care that could have been prevented?*" Coders  
26 21 could also respond "insufficient information", "Don't know" and give free text feedback (Table D,  
27 22 Appendix 1). The clinician scores were used to categorise the scenarios in to groups with higher or  
28 23 lower estimated likelihoods that they were a potentially-harmful preventable-problem as below.

- 24 24 • Higher threshold - Median score of 5 ("very likely or certain") or 4 ("probably") or at least  
25 25 one score of 5 ("very likely or certain")
- 26 26 • Lower threshold - Median score of 3 ("possibly") or at least one score of 4 ("probably" or  
27 27 higher)
- 28 28 • All other scenarios – Median score below 3 ("possibly") and zero scores above 3 ("possibly")  
29

30 30 Statistical analysis

31 31 Simple cross tabulations were used to describe the data and a binary logistic regression model was  
32 32 used to explore whether particular types of patient were more likely to perceive a potentially-  
33 33 harmful preventable-problems *e.g.* by demographics or their opinions. Comparisons between  
34 34 demographics and outcomes for the respondents and the UK (or England) population were made  
35 35 using a  $\chi^2$  test. All analyses were done using Stata 14.  
36

37 37 Public and Patient Involvement (PPI)

38 38 PPI was central to this co-design study and was provided through the GMPSTRC RUG (23) and other  
39 39 PPI networks (Box C, online Appendix 1). The study was conceived, designed, implemented and  
40 40 analysed by a team of three members of the public (AD, CG, JB) and one researcher (SJS). At the  
41 41 outset the researcher presented the existing literature on this topic to the PPI members of the  
42 42 research team who then co-designed the first draft of the survey which was tested through the PPI  
43 43 members' personal contacts. The piloting of the survey was through existing PPI networks as listed in  
44  
45  
46  
47  
48  
49  
50  
51  
52  
53  
54  
55  
56  
57  
58  
59  
60

1  
2  
3 1 Box B, online Appendix 1. The scoring of the questions as to the likelihood they described a  
4 2 potentially-harmful preventable-problem was undertaken by 7 members of the public, 2 of whom  
5 3 had no previous experience in PPI (as well as 5 GPs and 1 dentist as described in Table C, online  
6 4 Appendix 1). These findings will be disseminated to all the PPI groups that contributed to the pilot  
7 5 study and the authors will forward these results to their personal contacts who contributed to the  
8 6 questionnaire design.

9  
10  
11  
12 8 Ethical approval was granted by the University of Manchester Ethics Committee 2 (Approval 15372).

### 13 14 9 Results

15  
16 10 In total 977 members of the public accessed the online pilot survey and 638 (65%) completed the  
17 11 survey during October and November 2015. Flow charts of the participants through the survey are  
18 12 shown in Figures A&B, online Appendix 1. In total 223/638 (35%) of respondents reported ever  
19 13 experiencing a potentially-harmful preventable-problem in primary care of which 132 occurred  
20 14 within the past 12 months (21%, Fig A, online Appendix 1) and 62 (10%) of these problems were not  
21 15 identified through the initial screening question (Q2) but required prompting through Q10 (Box 1),  
22 16 see Fig A, online Appendix 1. A further 18 potentially-harmful preventable-problems involving  
23 17 friends or relatives where the respondent was present and occurred in the last 12 months were  
24 18 reported 13/418 (3%, Fig B, online Appendix 1). The majority of respondents (592, 93%) had  
25 19 confidence and trust in the GP seen at their last appointment similar to the 2016 England proportion  
26 20 of 92% (Q1, Box1 & Table 1). Demographic information was not provided by 83 (13%) respondents,  
27 21 possibly due to lack of clarity about the end of the survey since they completed all other questions.  
28 22 Respondents were older than the UK generally, more likely to work or volunteer in the healthcare  
29 23 sector and tended to use primary care more frequently (Table 1). Older respondents and those  
30 24 working or volunteering in the healthcare sector were no more likely to report a potentially-harmful  
31 25 preventable-problem occurring within the last 12 months but those using primary care more  
32 26 frequently were more likely to report a problem (Table 2).

33  
34  
35  
36  
37  
38 27 The majority of respondents were recruited through the HelpBeatDiabetes group (533, 84%, Box B in  
39 28 online Appendix 1). Over 250 respondents provided free text feedback on the survey, 200 comments  
40 29 reported that the questionnaire was easy to complete and understand and just one comment  
41 30 described the survey as complex. Most of the remaining comments expressed the desire to be able  
42 31 to provide more information, *e.g.* more than one event or report for a relative or as a carer  
43 32 (reporting on behalf of another person was excluded for events occurring more than 12 months ago)  
44 33 and 13 comments actually provided this unrequested information. A few respondents found it  
45 34 difficult to find a suitable option to describe their pattern of use of primary care or their role as a  
46 35 worker or volunteer in healthcare.

47  
48  
49  
50 36 The high completion rate and positive free text feedback suggested that respondents found the  
51 37 questionnaire easy to complete. Furthermore nobody used the "Do not understand the question"  
52 38 option as their response to Q2 Box1. There was a high response from healthcare professionals or  
53 39 volunteers (30% of respondents compared to approximately 3% of the UK adult population, Table 1)  
54 40 but they were no more likely to report a preventable problem than non-healthcare  
55 41 workers/volunteers (35%,  $P\chi^2=0.28$ ). However the scenarios described by healthcare professionals or  
56 42 volunteers were significantly more likely to be categorised as a potentially-harmful preventable-

1  
2  
3 1 problem following to clinician review using both the lower (9% vs 16%,  $P\chi^2=0.01$ ) and higher  
4 2 threshold (2% vs 6%,  $P\chi^2=0.004$ ).

### 3 Likelihood the scenario described a potentially-harmful preventable-problem

4 Generally the members of the public assigned a higher probability to the likelihood that the patient-  
5 described scenario was a potentially-harmful preventable-problem compared with GPs (Fig 1, Table  
6 3). In 89/108 (82%) scenarios the median score for the PPI researchers was higher than for the  
7 clinicians and for 38 (35%) scenarios the PPI median score was 2 or more points higher in a 5 point  
8 scale. Following clinician review 3% of the patient-reported scenarios occurring in the last 12 months  
9 were categorised as “probably” a potentially-unsafe preventable-problem and 11% as “possibly”  
10 (Table 3). Examples of the patient-reported scenarios with higher clinician rankings are shown in  
11 boxes 1-15, online Appendix 2 and those with greatest disagreement between members of the  
12 public and clinicians in boxes 16 to 23, online Appendix 2.

### 13 The nature of the potentially-harmful preventable-problems

14 The types of patient-reported scenarios and their categorisation following clinician review are shown  
15 in Figure 2. Medication-related problems were most frequently reported type of problem and also  
16 were ranked as more likely to be a potentially-harmful problem by clinicians. The type of scenario  
17 categorised according to whether it arose from the open-ended screening question (Q2) or  
18 prompted through the list of potential problems (Q10) is shown in Figures C&D, online Appendix 1.  
19 Information about the patient’s response to the potentially-harmful preventable-problem and the  
20 primary care service involved is provided in Table 4. The majority of potentially-harmful preventable-  
21 problems in the past 12 months occurred in general practice (73%, Table 4) and pharmacy (5%, Table  
22 4). Around half the respondents had not discussed their problem with anybody working in primary  
23 care (51%, Table 4). The most common reasons for not discussing the problem were being unable to  
24 find a primary care professional with whom to discuss the problem (31%, Table 4) or they did not  
25 feel comfortable with discussing their concerns (24%, Table 4) The patient suggestions for ways to  
26 prevent the problem from happening are summarised in Table 5. The most frequently occurring  
27 suggestions were that clinicians should involve the patient more fully in the healthcare process (*i.e.*  
28 listen to the patient and trust their judgement more) and be up to date with, and apply, the most  
29 recent information about the patient’s condition (*i.e.* take in to account all of the patient’s  
30 information - their medical history and results and letters).

### 31 Discussion

32 We have designed and tested a survey to measure the frequency of occurrence of potentially-  
33 harmful preventable-problems in primary care and found it to be well understood by patients. The  
34 survey is acceptable to patients based on the high completion rate and positive feedback.  
35 Furthermore none of the respondents indicated that they did not understand the screening question  
36 (Q2, Box1). The open-ended questions (Q6 to Q9, Box 1) led to patient-described scenarios that  
37 mapped well to an existing taxonomy designed and used by clinicians and researchers (Tables A&B,  
38 online Appendix 1, 25, 26). This implies agreement between clinicians, researchers and patients in  
39 identifying the characteristics of a potentially-harmful problem. Furthermore, the use of an open-  
40 ended screening question (Q2, Box 1) to ensure that any problems unique to the patient perspective  
41 were identified did not find additional new types of problem. The open-ended question elicited

1  
2  
3 1 more problems related to communication and medication suggesting that the public are more likely  
4 2 to view these as safety problems than problems related to appointments and referrals or  
5 3 investigations (Fig C&D online Appendix 1). We also observed that members of the public were more  
6 4 likely to rank the scenarios as a potentially-harmful preventable-problem than clinicians (Fig 1).  
7  
8 5

#### 9 6 Strengths and weaknesses of the study 10 7

11 8 We believe that our survey captures the true patient perspective due to the involvement of  
12 9 members of the public as research partners through data acquisition to analysis and reporting in a  
13 10 co-designed study. By the use of a simple non-leading screening question we encouraged  
14 11 respondents to express their own perspective on what constituted a potentially-harmful  
15 12 preventable-problem rather than directing them towards existing definitions. To ensure that we did  
16 13 not miss any problems we followed up with a prompt that encouraged respondents to think in terms  
17 14 of the traditional view of patient safety problems. Furthermore our survey goes further than  
18 15 describing and counting the frequency of occurrence of potentially-harmful preventable-problems  
19 16 and provides information about how patients dealt with the problem and how it could have been  
20 17 prevented that offers insight in to ways to reduce the frequency of their occurrence. The absence of  
21 18 a link between practices and the patients allows for responses that might not occur if this survey  
22 19 were administered through the individual's practice. The main weakness of the study is the self-  
23 20 selection of the respondents who were older and tended to use primary care more frequently. More  
24 21 frequent users of primary care were more likely to report a problem but age was not associated with  
25 22 the likelihood of reporting a problem. Our bench marking question (Q1, Box1) showed that the  
26 23 respondents were similar to the English GP patient survey (24) in terms of their level of confidence  
27 24 and trust in their GP and not a group with a more negative attitude towards primary care as might  
28 25 have happened given the nature of the survey.  
29 26

#### 30 27 Strengths and weaknesses in relation to other studies 31 28

32 29 Our finding that 35% of respondents perceived that they had experienced a potentially-harmful  
33 30 problem in in their lifetime is consistent with a European survey (43% of UK respondents felt that it  
34 31 was "likely" that patients could be harmed by non-hospital healthcare).(17) This study offers some  
35 32 insight in to the type of concerns that might underlie this apparent lack of confidence in primary  
36 33 care. A face to face interview in family practice waiting rooms in the USA reported that 16% of  
37 34 respondents believed a physician had made a mistake in their care.(27) The types of problem and  
38 35 patient responses to the problem are similar to those that have been described qualitatively (1, 22)  
39 36 but we have taken this a step further by quantifying their frequency of occurrence and other  
40 37 descriptors of the problem from the patient's perspective. In this small study we did not find that  
41 38 patients were particularly likely to attribute blame to individual members of staff as has been  
42 39 observed previously (3, 4), perhaps partly due to the high proportion of respondents working or  
43 40 volunteering in healthcare.  
44 41

#### 45 42 Unanswered questions and future research 46 43

47 44 Our finding that 21% of respondents perceived that they had experienced a potentially-harmful  
48 45 problem in the last 12 months, and the corresponding proportion following clinician review of 3%  
49 (higher threshold) to 11% (lower threshold) may well reflect the self-selected nature of the study  
50  
51  
52  
53  
54  
55  
56  
57  
58  
59  
60

1 population and needs to be validated in a large population level survey. We anticipate that a  
2 population level survey would be fruitful since this approach yielded a number of patient-described  
3 scenarios that were amenable to further analysis including coding by clinicians. The high response to  
4 this pilot survey by healthcare professionals coupled with the likelihood that they provided better  
5 information, given the higher ranking given by clinicians to scenarios originating from healthcare  
6 professionals, points towards an opportunity. Healthcare professionals are an educated and  
7 accessible group who could provide a valuable resource for learning about preventable-problems in  
8 primary care. This survey could be used to ask NHS staff anonymously about their *personal*  
9 *experiences, as a patient*, of potentially-harmful preventable-problems in primary care. Of course  
10 complete anonymity for responders would need to be guaranteed and any identifying aspects in  
11 their reported scenarios would have to be removed. It would be very different to whistle-blowing,  
12 respondents would feed back on the care they received personally rather make observations on  
13 their own colleagues practice. The aim would be to anonymously describe and monitor problems  
14 over time through individuals with the expectations of a patient who also had an understanding of  
15 the healthcare system.

16  
17 Acknowledgements: The authors would like to express their thanks and appreciation for the work  
18 done by the Mary Aldred, Gitanjali Holt, Manoj Mistry, Carole Bennett and Lindsey Brown in coding  
19 the patient-described scenarios.

20  
21 This work was supported by the NIHR grant number gmpstrc-2012-1

22  
23 Funding: This study was funded by the National Institute for Health Research  
24 (<http://www.nihr.ac.uk>) through the Greater Manchester Primary Care Patient Safety Translational  
25 Research Centre (NIHR GM PSTRC), grant number gmpstrc-2012-1. The views expressed are those of  
26 the author(s) and not necessarily those of the NHS, the NIHR or the Department of Health. The  
27 funders had no role in study design, data collection and analysis, decision to publish, or preparation  
28 of the manuscript.

29 Competing interests: All authors have completed the ICMJE uniform disclosure form at  
30 [www.icmje.org/coi\\_disclosure.pdf](http://www.icmje.org/coi_disclosure.pdf) (available on request from the corresponding author) and declare  
31 no support from any organisation for the submitted work; no financial relationships with any  
32 organisations that might have an interest in the submitted work in the previous three years, no  
33 other relationships or activities that could appear to have influenced the submitted work.

34 Copyright statement: the Corresponding Author has the right to grant on behalf of all authors and  
35 does grant on behalf of all authors, an exclusive licence on a worldwide basis to the BMJ Publishing  
36 Group Ltd to permit this article (if accepted) to be published in BMJ editions and any other BMJPL  
37 products and sublicences such use and exploit all subsidiary rights, as set out in our licence.

38 Contributors: SJS, AD, JB and CG conceived and designed the study. SJS, AD, JB, CG, AE, PB, JA, DT,  
39 SL, AD, RD and NM analysed the data. SJS wrote the manuscript, and is guarantor. AD, JB, CG, AE, PB,  
40 JA, DT, SL, AD, RD, NM and SC edited the manuscript.

41 Data sharing: Raw data (coded only) is available from [jill.stocks@manchester.ac.uk](mailto:jill.stocks@manchester.ac.uk)

42 Ethics approval: University of Manchester Ethics Committee 2 (Approval 15372)

1  
2  
3  
4  
5  
6  
7  
8  
9  
10  
11  
12  
13  
14  
15  
16  
17  
18  
19  
20  
21  
22  
23  
24  
25  
26  
27  
28  
29  
30  
31  
32  
33  
34  
35  
36  
37  
38  
39  
40  
41  
42  
43  
44  
45  
46  
47  
48  
49  
50  
51  
52  
53  
54  
55  
56  
57  
58  
59  
60

1 Figure legends

2 Figure 1. Median estimates as to the likelihood that the patient describes a potentially-harmful  
3 preventable-problem occurring in the last 12 months by six clinicians and seven members of the  
4 public

5 Footnote to Figure 2: See Tables A&B, online Appendix 1 for details of coding; A coded to 2 levels, B  
6 medication problems coded to 3 levels, C coded to 1 level

7 Fig 2. Numbers of patient-perceived problems occurring in the last 12 months categorised according  
8 to the patient's description with clinician ranking as to the likelihood it is a potentially-harmful  
9 preventable problem (Table 3).

10

11

For peer review only

1

Box 1. Brief summary of questionnaire – see Box A, online Appendix 1 for full version of survey.

Q1. Did you have confidence and trust in the GP you saw or spoke to at your last appointment?  
(benchmarking question)

Q2. When using primary care have you ever felt concerned that your health might be worsened, or actually was made worse, because of a mistake or a problem that could have been prevented?

If yes to Q2

Q3. How long ago did the mistake or preventable problem happen?

Q4. How did this affect your health?

Q5. Which primary care service were you using when the mistake or preventable problem occurred?

Q6. Briefly describe the mistake or problem and how it happened

Q7. Could the mistake or problem have been avoided? If so how?

Q8. Were you able to talk about the mistake or problem with anybody working in the primary care service? If not –why not?

Q9. If you discussed the mistake or problem with somebody working in primary care please describe their job or role

Q10. In the list below are some examples of **preventable** problems<sup>1</sup> that might happen when using primary care. Has ***anything similar*** happened to you ***in the last 12 months***? If yes go to Q4

<sup>1</sup>See Q10 Box A, online Appendix 1 for list of preventable problems

2

3

1 Table 1. Characteristics of survey respondents

| Variable                               | All respondents<br>n=638 | Ever had problem<br>n=223 | Had problem<br>in last 12<br>months<br>n=132 | UK population<br>comparator            |
|----------------------------------------|--------------------------|---------------------------|----------------------------------------------|----------------------------------------|
| GP satisfaction                        | missing=0                | missing=0                 | missing=0                                    | English GP patient survey(24)          |
| Yes definitely                         | 384 (60%)                | 81 (36%)                  | 55 (42%)                                     | 64%                                    |
| Yes, to some extent                    | 208 (33%)                | 110 (49%)                 | 52 (39%)                                     | 28%                                    |
| No, not at all                         | 39 (6%)                  | 27 (12%)                  | 21 (16%)                                     | 4%                                     |
| Don't know / can't say                 | 7 (1%)                   | 5 (2%)                    | 4 (3%)                                       | 3%                                     |
| Worked or volunteered in<br>healthcare | missing=92               | missing=40                | missing=19                                   | NHS workforce <sup>1</sup>             |
| Yes                                    | 166 (30%)                | 64 (35%)                  | 41 (36%)                                     | 3%                                     |
| Gender                                 | missing=87               | missing=38                | missing=16                                   | ONS mid-2015<br>estimates <sup>2</sup> |
| Female                                 | 268 (49%)                | 106 (57%)                 | 63 (54%)                                     | 51%                                    |
| Age                                    | missing=85               | missing=37                | missing=15                                   | ONS mid-2015<br>estimates <sup>2</sup> |
| 16 to 34 years                         | 42 (8%)                  | 22 (12%)                  | 11 (9%)                                      | 31%                                    |
| 35 to 54 years                         | 143 (26%)                | 54 (29%)                  | 34 (29%)                                     | 34%                                    |
| 55 to 64 years                         | 162 (29%)                | 59 (32%)                  | 31 (27%)                                     | 14%                                    |
| 65 to 74 years                         | 170 (31%)                | 44 (24%)                  | 32 (27%)                                     | 12%                                    |
| Over 75 years                          | 36 (7%)                  | 7 (4%)                    | 9 (8%)                                       | 9%                                     |
| Last primary care contact              | missing=88               | missing=39                | missing=14                                   | English GP patient<br>survey(24)       |
| Within last week                       | 169 (31%)                | 65 (35%)                  | 48 (41%)                                     | 84% within last<br>12 months           |
| Within last month                      | 248 (45%)                | 79 (43%)                  | 47 (40%)                                     |                                        |
| Within last 12 months                  | 121 (22%)                | 34 (18%)                  | 20 (17%)                                     |                                        |
| Over 12 months ago                     | 12 (2%)                  | 6 (3%)                    | 3 (3%)                                       | 15%                                    |
| Usual primary care usage               | missing=88               | missing=40                | missing=17                                   |                                        |
| At least once a month                  | 181 (33%)                | 73 (40%)                  | 52 (45%)                                     | -                                      |
| At least once per 6 months             | 285 (52%)                | 79 (43%)                  | 45 (39%)                                     | -                                      |
| Once per 12 months or less             | 84 (15%)                 | 31 (17%)                  | 18 (16%)                                     | -                                      |

<sup>1</sup><http://content.digital.nhs.uk/searchcatalogue?productid=24139&topics=1%2fWorkforce%2fStaff+numbers&sort=Relevance&size=10&page=1#top>

<sup>2</sup><https://www.ons.gov.uk/peoplepopulationandcommunity/populationandmigration/populationestimates/bulletins/annualmidyearpopulationestimates/latest>



1 Table 2. Prevalence of respondents reporting a potentially-harmful preventable problem within the  
 2 last 12 months and unadjusted and adjusted odds ratios estimated by logistic regression

| Respondent characteristics<br>n=638                   | Frequency – all<br>reported n=132 | Unadjusted<br>odds ratio (OR)<br>– all reports | Adjusted <sup>1</sup> OR -<br>all reports | Adjusted <sup>1</sup> OR -<br>after GP review<br>(lower threshold,<br>Table 3) |
|-------------------------------------------------------|-----------------------------------|------------------------------------------------|-------------------------------------------|--------------------------------------------------------------------------------|
| <b>Gender (87 missing)</b>                            |                                   |                                                |                                           |                                                                                |
| male                                                  | 53/283 (19%)                      | 1 (ref)                                        | 1 (ref)                                   | 1 (ref)                                                                        |
| female                                                | 63/268 (24%)                      | 1.3 (0.9 to 2.0)                               | 1.4 (0.9 to 2.2)                          | 1.3 (0.7 to 2.3)                                                               |
| <b>Age (85 missing)</b>                               |                                   |                                                |                                           |                                                                                |
| 16 to 34 years                                        | 11/42 (26%)                       | 1 (ref)                                        | 1 (ref)                                   | 1 (ref)                                                                        |
| 35 to 54 years                                        | 34/143 (24%)                      | 0.9 (0.4 to 1.9)                               | 0.8 (0.3 to 1.8)                          | 0.8 (0.3 to 2.1)                                                               |
| 55 to 64 years                                        | 31/162 (19%)                      | 0.7 (0.3 to 1.5)                               | 0.7 (0.3 to 1.5)                          | 0.6 (0.2 to 1.7)                                                               |
| 65 to 74 years                                        | 32/170 (19%)                      | 0.7 (0.3 to 1.4)                               | 0.6 (0.3 to 1.4)                          | 0.4 (0.2 to 1.2)                                                               |
| Over 75 years                                         | 9/36 (25%)                        | 0.9 (0.3 to 2.6)                               | 1.1 (0.4 to 3.2)                          | 0.9 (0.2 to 3.2)                                                               |
| <b>Last primary care contact (88 missing)</b>         |                                   |                                                |                                           |                                                                                |
| Within last week                                      | 48/169 (28%)                      | 1 (ref)                                        | 1 (ref)                                   | 1 (ref)                                                                        |
| Within last month                                     | 47/248 (19%)                      | 0.6 (0.4 to 0.9)                               | 0.7 (0.4 to 1.1)                          | 0.6 (0.3 to 1.0)                                                               |
| Within last 12 months                                 | 20/121 (17%)                      | 0.5 (0.3 to 0.9)                               | 0.6 (0.3 to 1.2)                          | 0.5 (0.2 to 1.3)                                                               |
| Over 12 months ago                                    | 3/12 (25%)                        | 0.8 (0.2 to 4.0)                               | 0.9 (0.2 to 4.2)                          | 0.4 (0.0 to 3.9)                                                               |
| <b>Usual primary care usage (88 missing)</b>          |                                   |                                                |                                           |                                                                                |
| At least once a month                                 | 52/181 (29%)                      | 1 (ref)                                        | 1 (ref)                                   | 1 (ref)                                                                        |
| At least once per 6 months                            | 45/285 (16%)                      | 0.5 (0.3 to 0.7)                               | 0.6 (0.3 to 0.9)                          | 0.5 (0.3 to 0.9)                                                               |
| Once per 12 months or less                            | 18/84 (21%)                       | 0.7 (0.4 to 1.2)                               | 0.8 (0.4 to 1.6)                          | 0.7 (0.3 to 1.8)                                                               |
| <b>Works or volunteers in healthcare (92 missing)</b> |                                   |                                                |                                           |                                                                                |
| No                                                    | 72/380 (19%)                      | 1 (ref)                                        | 1 (ref)                                   | 1 (ref)                                                                        |
| Yes                                                   | 41/166 (25%)                      | 1.4 (0.9 to 2.2)                               | 1.3 (0.8 to 2.1)                          | 1.5 (0.9 to 2.7)                                                               |

3 <sup>1</sup>adjusted for gender, age, last primary care contact, usual primary care usage, works or volunteers in  
 4 healthcare

1 Table 3. Categorisation of patient-perceived potentially-harmful preventable problems occurring in  
 2 the last 12 months following review by clinicians and members of the public

| Group label         | Threshold criteria                                                                                       | Clinician scores<br>n=132 | Members of the public scores<br>n=132 |
|---------------------|----------------------------------------------------------------------------------------------------------|---------------------------|---------------------------------------|
| 1. Higher threshold | Median score of “very likely or certain” or “probably” or at least one score of “very likely or certain” | 18 (14%)                  | 87 (66%)                              |
| 2. Lower threshold  | Median score of “possibly” or at least one score of “probably” or higher                                 | 71 (54%)                  | 104(79%)                              |
| 3. Any possibility  | At least one score of “unlikely” or higher                                                               | 106 (80%)                 | 109 (83%)                             |
| 4. No problem       | All scores “definitely not” or not-coded                                                                 | 1 (1%)                    | 0                                     |
| 5. Not-coded        | Insufficient information for coding by all coders                                                        | 25 (19%)                  | 23 (17%)                              |

1 Table 4. The patient's response to their perceived potentially-harmful preventable-problem and the  
 2 primary care service involved for problems occurring in the last 12 months

| Primary care service                                        | All reported problems | Clinician ranked "possibly or higher" (Lower threshold) |
|-------------------------------------------------------------|-----------------------|---------------------------------------------------------|
| All services                                                | 132                   | 71                                                      |
| GP surgery                                                  | 97 (73%)              | 61 (86%)                                                |
| Out of hours care/A&E/ambulance                             | 4 (3%)                | 1 (1%)                                                  |
| Walk in clinic                                              | 2 (2%)                | 0                                                       |
| Dental surgery                                              | 4 (3%)                | 1 (1%)                                                  |
| Pharmacy                                                    | 7 (5%)                | 6 (8%)                                                  |
| Community or district nursing                               | 4 (3%)                | 0                                                       |
| Opticians                                                   | 2 (2%)                | 1 (1%)                                                  |
| Mental health services                                      | 1 (1%)                | 0                                                       |
| missing                                                     | 11 (8%)               | 1 (1%)                                                  |
| <b>Did you discuss the problem with primary care staff?</b> |                       |                                                         |
| All respondents                                             | 132                   | 71                                                      |
| Yes – discussed with primary care staff                     | 56 (42%)              | 42 (59%)                                                |
| No – did not discuss with primary care staff                | 67 (51%)              | 29 (41%)                                                |
| missing                                                     | 9 (7%)                | 0                                                       |
| <b>Reason not discussed with primary care staff</b>         |                       |                                                         |
| All not discussing problem                                  | 67                    | 29                                                      |
| Did not feel comfortable to discuss the problem             | 16 (24%)              | 8 (28%)                                                 |
| Could not find anybody with whom to discuss the problem     | 21 (31%)              | 10 (34%)                                                |
| Unconcerned about the problem                               | 7 (10%)               | 5 (17%)                                                 |
| Did not notice the problem at the time (or too ill)         | 11 (16%)              | 4 (14%)                                                 |
| Other                                                       | 5 (7%)                | 2 (7%)                                                  |
| missing                                                     | 7 (10%)               | 0                                                       |
| <b>Profession of discussant</b>                             |                       |                                                         |
| All discussing problem                                      | 56                    | 42                                                      |
| GP                                                          | 28 (50%)              | 19 (45%)                                                |
| Practice manager                                            | 5 (9%)                | 5 (21%)                                                 |
| Receptionist                                                | 2 (4%)                | 1 (2%)                                                  |
| Practice nurse                                              | 6 (11%)               | 5 (12%)                                                 |
| Pharmacist or dispenser                                     | 7 (13%)               | 7 (17%)                                                 |
| Dentist                                                     | 2 (4%)                | 1 (2%)                                                  |
| Dietician                                                   | 1 (2%)                | 1 (2%)                                                  |
| Missing                                                     | 5 (9%)                | 3 (7%)                                                  |
| <b>Role of discussant in patient's care</b>                 |                       |                                                         |
| Member of staff directly involved                           | 23 (41%)              | 16 (38%)                                                |
| Another member of staff at same institution                 | 25 (45%)              | 20 (48%)                                                |
| Above unclear                                               | 8 (14%)               | 6 (14%)                                                 |

3

4

1 Table 5. Patient suggestions as to how the potentially-harmful preventable problem might have  
2 been prevented

| How could it be prevented?                                                                                 | All reported problems<br>n=132 | Clinician ranked<br>“possibly or<br>higher” (Lower<br>threshold) n=71 |
|------------------------------------------------------------------------------------------------------------|--------------------------------|-----------------------------------------------------------------------|
| <b>1. More resources - all</b>                                                                             | <b>14 (11%)</b>                | <b>3 (4%)</b>                                                         |
| 1.1 Quicker access to primary care                                                                         | 7 (5%)                         | 2 (3%)                                                                |
| 1.2 More thorough and quicker investigations                                                               | 2 (2%)                         | 1 (1%)                                                                |
| 1.3 Fewer demands on primary care – more staff or fewer patients                                           | 1 (1%)                         | 0                                                                     |
| 1.4 More time with clinicians for treatment and diagnosis                                                  | 2 (2%)                         | 0                                                                     |
| 1.9 Provision of resources to manage long term conditions                                                  | 1 (1%)                         | 0                                                                     |
| 1.10 Provision of patient travel service for routine appointments                                          | 1 (1%)                         | 0                                                                     |
| <b>2. Improved communication and involvement of patients</b>                                               | <b>26 (20%)</b>                | <b>18 (25%)</b>                                                       |
| 2.1 Listen to the patient and trust their judgement more                                                   | 21 (16%)                       | 15 (21%)                                                              |
| 2.2 Tell patients about their diagnosis, test results, changes in medication or loss of results            | 3 (2%)                         | 1 (1%)                                                                |
| 2.3 Improve communication between staff (within or outside primary care)                                   | 2 (2%)                         | 2 (3%)                                                                |
| <b>3. Better organisation and administration</b>                                                           | <b>17 (13%)</b>                | <b>10 (14%)</b>                                                       |
| 3.1 Follow up referrals and appointments to ensure they happen, be consistent in sending routine reminders | 10 (8%)                        | 3 (4%)                                                                |
| 3.2 Log in or process results as soon as received to avoid loss                                            | 1 (1%)                         | 1 (1%)                                                                |
| 3.3 Keep the notes up to date, well-organised, safe and ensure information is transcribed accurately       | 5 (4%)                         | 5 (7%)                                                                |
| 3.4 Keep a record of the location of equipment                                                             | 1 (1%)                         | 1 (1%)                                                                |
| <b>4. Improved prescribing systems</b>                                                                     | <b>18 (14%)</b>                | <b>17 (24%)</b>                                                       |
| 4.1 More checks on prescribing and dispensing                                                              | 8 (6%)                         | 8 (11%)                                                               |
| 4.2 Check repeat prescriptions carefully, especially for transcribing errors                               | 8 (6%)                         | 7 (10%)                                                               |
| 4.3 Use medication reviews and IT clinical decision support systems                                        | 2 (2%)                         | 2 (3%)                                                                |
| <b>5. Better clinical practice</b>                                                                         | <b>19 (14%)</b>                | <b>10 (14%)</b>                                                       |
| 5.1 Take in to account all the patient’s information - their medical history and results and letters       | 13 (10%)                       | 7 (10%)                                                               |
| 5.2 Address the patient’s problem in some way – patients can feel their problem is being ignored           | 5 (4%)                         | 2 (3%)                                                                |
| 5.3 Act on advice from other clinicians and test results                                                   | 1 (1%)                         | 1 (1%)                                                                |
| <b>6. Staff training</b>                                                                                   | <b>11 (8%)</b>                 | <b>7 (10%)</b>                                                        |
| 6.1 More informed and better trained staff                                                                 | 11 (8%)                        | 7 (10%)                                                               |
| <b>Other responses</b>                                                                                     | <b>27 (20%)</b>                | <b>6 (8%)</b>                                                         |
| •Don’t know/missing                                                                                        | 21 (16%)                       | 3 (4%)                                                                |
| •Problem was due to an individual member of staff                                                          | 2 (2%)                         | 1 (1%)                                                                |
| •Prescribe right, better, different, more, less medicine                                                   | 1 (1%)                         | 0                                                                     |
| •Better organisation                                                                                       | 1 (1%)                         | 0                                                                     |
| •Laboratory procedures were the problem                                                                    | 2 (2%)                         | 2 (3%)                                                                |

1  
2  
3 1 References

- 4 2
- 5 3 1. Rhodes P, Campbell S, Sanders C. Trust, temporality and systems: how do patients understand  
6 4 patient safety in primary care? A qualitative study. *Health Expectations*. 2016;19(2):253-63.
- 7 5
- 8 6 2. Vincent C, Amalberti R. *Safer Healthcare: Strategies for the Real World*. Springer, 2016.  
9 7 <http://www.springer.com/gb/book/9783319255576> Accessed 04/04/17
- 10 8
- 11 9 3. Blendon RJ, DesRoches CM, Brodie M, Benson JM, Rosen AB, Schneider E, et al. Views of practicing  
12 10 physicians and the public on medical errors. *N Engl J Med*. 2002;347(24):1933-40.
- 13 11
- 14 12 4. Hotvedt R, Forde OH. Doctors are to blame for perceived medical adverse events. A cross  
15 13 sectional population study. *The Tromso Study. BMC health services research*. 2013;13:46.
- 16 14
- 17 15 5. Kuzel AJ, Woolf SH, Gilchrist VJ, Engel JD, LaVeist TA, Vincent C, et al. Patient reports of  
18 16 preventable problems and harms in primary health care. *Ann Fam Med*. 2004;2(4):333-40.
- 19 17
- 20 18 6. The Health Foundation. Evidence scan: Involving patients in improving safety. January 2013.  
21 19 <http://www.health.org.uk/sites/health/files/InvolvingPatientsInImprovingSafety.pdf> Accessed  
22 20 04/04/17
- 23 21
- 24 22 7. Basch E. The missing voice of patients in drug-safety reporting. *N Engl J Med*. 2010;362(10):865-9.
- 25 23
- 26 24 8. King A, Daniels J, Lim J, Cochrane DD, Taylor A, Ansermino JM. Time to listen: a review of methods  
27 25 to solicit patient reports of adverse events. *Qual Saf Health Care*. 2010;19(2):148-57.
- 28 26
- 29 27 9. Longtin Y, Sax H, Leape LL, Sheridan SE, Donaldson L, Pittet D. Patient participation: current  
30 28 knowledge and applicability to patient safety. *Mayo Clinic proceedings*. 2010;85(1):53-62.
- 31 29
- 32 30 10. Sanders J, Esmail A. The frequency and nature of medical error in primary care: understanding  
33 31 the diversity across studies. *Family practice*. 2003;20(3):231-6.
- 34 32
- 35 33 11. Panesar SS, deSilva D, Carson-Stevens A, Cresswell KM, Salvilla SA, Slight SP, et al. How safe is  
36 34 primary care? A systematic review. *BMJ Quality & Safety*. 2016;25(7):544-53.
- 37 35
- 38 36 12. Michel P, Brami J, Chaneliere M, Kret M, Mosnier A, Dupie I, et al. Patient safety incidents are  
39 37 common in primary care: A national prospective active incident reporting survey. *PLoS One*.  
40 38 2017;12(2):e0165455.
- 41 39
- 42 40 13. NHS Improvement. National quarterly data on patient safety incident reports. September 2016.  
43 41 [https://improvement.nhs.uk/resources/national-quarterly-data-patient-safety-incident-reports-](https://improvement.nhs.uk/resources/national-quarterly-data-patient-safety-incident-reports-september-2016/)  
44 42 [september-2016/](https://improvement.nhs.uk/resources/national-quarterly-data-patient-safety-incident-reports-september-2016/) Accessed 04/04/17
- 45 43
- 46 44 14. Hutchinson A, Young TA, Cooper KL, McIntosh A, Karnon JD, Scobie S, et al. Trends in healthcare  
47 45 incident reporting and relationship to safety and quality data in acute hospitals: results from the  
48 46 National Reporting and Learning System. *Qual Saf Health Care*. 2009;18(1):5-10.
- 49 47
- 50 48 15. NHS England. General practice patient safety reporting form launched. 26th February 2015.  
51 49 <https://www.england.nhs.uk/2015/02/gp-patient-safety-reporting/> Accessed 04/04/17
- 52 50
- 53
- 54
- 55
- 56
- 57
- 58
- 59
- 60

- 1  
2  
3 1 16. The Health Foundation. Evidence Scan: Improving safety in primary care. November 2011.  
4 2 <http://www.health.org.uk/sites/health/files/ImprovingSafetyInPrimaryCare.pdf> Accessed 04/04/17  
5 3  
6 4 17. European Commission. Special Eurobarometer 411 Patient Safety and Quality of Care 2014.  
7 5 DOI:10.2772/33467  
8 6 [https://ec.europa.eu/health/sites/health/files/patient\\_safety/docs/ebs\\_411\\_sum\\_en.pdf](https://ec.europa.eu/health/sites/health/files/patient_safety/docs/ebs_411_sum_en.pdf)  
9 7 Accessed 04/04/17  
10 8  
11 9 18. Mira JJ, Nebot C, Lorenzo S, Perez-Jover V. Patient report on information given, consultation time  
12 10 and safety in primary care. Qual Saf Health Care. 2010;19(5):e33.  
13 11  
14 12 19. Wasson JH, MacKenzie TA, Hall M. Patients use an internet technology to report when things go  
15 13 wrong. Qual Saf Health Care. 2007;16(3):213-5.  
16 14  
17 15 20. Ricci-Cabello I, Goncalves DC, Rojas-Garcia A, Valderas JM. Measuring experiences and outcomes  
18 16 of patient safety in primary care: a systematic review of available instruments. Family practice.  
19 17 2015;32(1):106-19.  
20 18  
21 19 21. Ricci-Cabello I, Avery AJ, Reeves D, Kadam UT, Valderas JM. Measuring Patient Safety in Primary  
22 20 Care: The Development and Validation of the "Patient Reported Experiences and Outcomes of Safety  
23 21 in Primary Care" (PREOS-PC). Ann Fam Med. 2016;14(3):253-61.  
24 22  
25 23 22. Ricci-Cabello I, Saletti-Cuesta L, Slight SP, Valderas JM. Identifying patient-centred  
26 24 recommendations for improving patient safety in General Practices in England: a qualitative content  
27 25 analysis of free-text responses using the Patient Reported Experiences and Outcomes of Safety in  
28 26 Primary Care (PREOS-PC) questionnaire. Health Expectations. 2017.  
29 27  
30 28 23. Stocks SJ, Giles SJ, Cheraghi-Sohi S, Campbell SM. Application of a tool for the evaluation of  
31 29 public and patient involvement in research. BMJ Open. 2015;5(3).  
32 30  
33 31 24. NHS England. GP Patient Survey – National summary report. January 2016. [http://gp-survey-](http://gp-survey-production.s3.amazonaws.com/archive/2016/January/January+2016+National+Summary+Report.pdf)  
34 32 [production.s3.amazonaws.com/archive/2016/January/January+2016+National+Summary+Report.pdf](http://gp-survey-production.s3.amazonaws.com/archive/2016/January/January+2016+National+Summary+Report.pdf)  
35 33 [f](http://gp-survey-production.s3.amazonaws.com/archive/2016/January/January+2016+National+Summary+Report.pdf) Accessed 04/04/17  
36 34  
37 35 25. Dovey SM, Meyers DS, Phillips RL, Jr., Green LA, Fryer GE, Galliher JM, et al. A preliminary  
38 36 taxonomy of medical errors in family practice. Qual Saf Health Care. 2002;11(3):233-8.  
39 37  
40 38 26. Makeham MA, Dovey SM, County M, Kidd MR. An international taxonomy for errors in general  
41 39 practice: a pilot study. Med J Aust. 2002;177(2):68-72.  
42 40  
43 41 27. Kistler CE, Walter LC, Mitchell C, Sloane PD. Patient perceptions of mistakes in ambulatory care.  
44 42 Archives of Internal Medicine. 2010;170(16):1480-7.  
45  
46  
47  
48  
49  
50  
51  
52  
53  
54  
55  
56  
57  
58  
59  
60

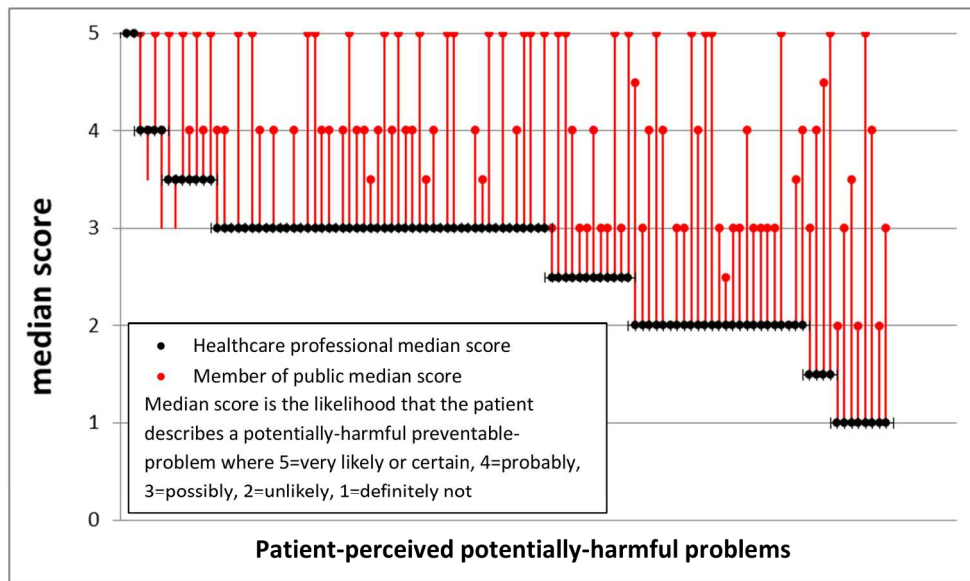

Figure 1. Median estimates as to the likelihood that the patient describes a potentially-harmful preventable-problem occurring in the last 12 months by six clinicians and seven members of the public

170x102mm (300 x 300 DPI)

Review only

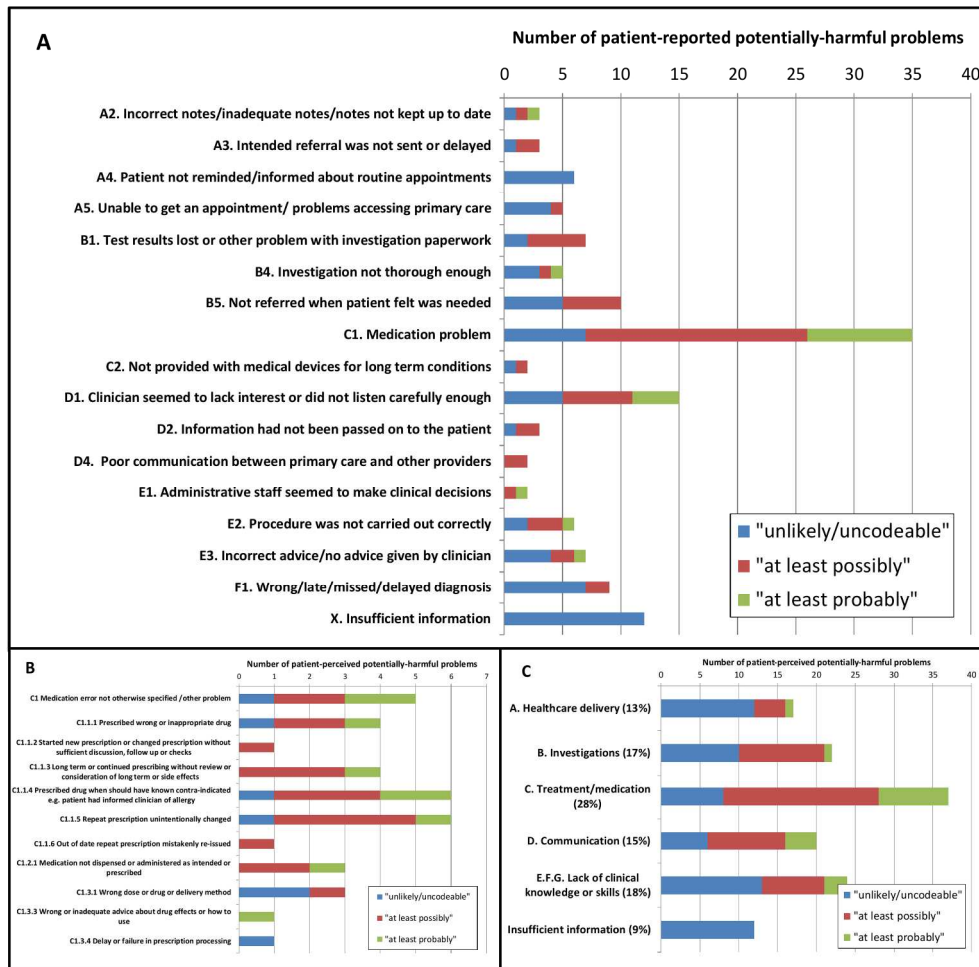

Footnote to Figure 2: See online Appendix 2 for details of coding; A coded to 2 levels, B medication problems coded to 3 levels, C coded to 1 level!! + Fig 2. Numbers of patient-perceived problems occurring in the last 12 months categorised according to the patient's description with clinician ranking as to the likelihood it is a potentially-harmful preventable problem (Table 3).!! +

199x195mm (300 x 300 DPI)

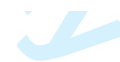



Appendix 1. Details of survey, coding systems, public and clinician contributors and supplementary results

**Box A. Pilot survey administered online November and December 2015**

Q1. Did you have confidence and trust in the GP you saw or spoke to at your last appointment?

Response options: Yes, definitely, Yes, to some extent, No, not at all, Don't know / can't say

Q2. When using primary care have you ever felt concerned that your health might be worsened, or actually was made worse, because of a mistake or a problem that could have been prevented?

Response options: Yes, No- *go to Q10*, Do not understand the question- *go to Q10*, Don't know / can't remember- *go to Q10*

Q3. How long ago did the mistake or preventable problem happen?

Response options: Within the last 12 months, More than 12 months ago- *go to Q10*, Can't remember- *go to Q10*

Q4. In your opinion did this experience

Response options: Make your health worse, Not certain but it might have made your health worse, Could have made your health worse if you had not noticed the problem, Delayed your treatment but had no effect on your health, Not affect you, or your health, Other, please explain

Q5. Which primary care service were you using when the mistake or preventable problem occurred?

Response options: GP surgery, Out of hours care, Walk in clinic, Dental, Pharmacy, Community or district nursing, Ambulance, Opticians, Other- please specify

Q6. Briefly describe the mistake or problem and how it happened

Response options: free text

Q7. Could the mistake or problem have been avoided? If so how?

Response options: free text

Q8. Were you able to talk about the mistake or problem with anybody working in the primary care service?

Response options: Yes, Yes had the opportunity but did not feel comfortable to discuss the mistake or problem, No I could not find anybody with whom I could discuss the mistake or problem, No I was not concerned about the problem, No I did not notice the mistake or problem at the time, I was too distressed to discuss the mistake or problem, Other or don't know - please describe

Q9. If you discussed the mistake or problem with somebody working in primary care please describe their job or role

Response options: free text

Q10. In the list below are some examples of preventable problems that might happen when using primary care. Has anything similar happened to you in the last 12 months? Please check as many as applicable or "NONE OF BELOW"

NONE OF BELOW

Wrong or late diagnosis

Not referred for further investigation when needed

Test results being lost or mixed up

Receiving the wrong medicine or wrong dose

Should not be prescribed the medicine because of another health problem

Should not be prescribed the medicine because of another medication already taking

Poor communication leading to misunderstanding of diagnosis or treatment

Not referred to a specialist when needed

1  
2  
3  
4  
5  
6  
7  
8  
9  
10  
11  
12  
13  
14  
15  
16  
17  
18  
19  
20  
21  
22  
23  
24  
25  
26  
27  
28  
29  
30  
31  
32

Unclear instructions about treatment  
 Not offering of prevention or screening programmes eg CVD/stroke prevention clinics  
 Failure to recognise or act on vulnerable people's needs eg child abuse, suicide risk or mental health problems  
 Mistake with a procedure eg dental treatment, injection, ear syringing, physiotherapy  
 Failure to notify about recommended vaccinations eg flu, HPV  
 Poor hygiene  
 Unsafe building or premises  
 Any other preventable problem in the last 12 months (in your opinion)  
 Other, please explain below

Q11. Are you male or female? Response options: Male, Female, prefer not to say

Q12. How old are you?  
Response options: under 16, 16 to 24, 25 to 34, 45 to 54, 55 to 64, 65 to 74, 75 to 84, 85 or older

Q13. When was your last contact with primary care?  
Response options: Last week, Last month, Last 12 months, Over 12 months ago

Q14. What best describes your usual pattern of use of primary care? Response options: Once per week, Once per 2 weeks, Once per month, Once per 6 months, Once per 12 months or less often

Q15. Are you registered with a GP practice?  
Response options: Yes, No, I only use walk in centres, Don't know

Q16. Do you work or volunteer in healthcare or healthcare research as a professional, patient, carer or member of the public? (if you are retired answer for your occupation before retirement)  
Response options: Yes, No

Q17. We are still trying to improve this questionnaire so would be grateful for any feedback about how easy you found the questionnaire to complete? How can it be improved?  
Response options: free text

33  
34  
35

Box B. List of public and patient involvement groups used to distribute the pilot survey

36  
37  
38

Associate Research User Group of the Greater Manchester Primary Care Patient Safety Translational Research Centre <http://research.bmh.manchester.ac.uk/primary-care-patient-safety/GetInvolved/>

39  
40  
41

The Primary Care Research in Manchester Engagement Resource  
<http://research.bmh.manchester.ac.uk/PRIMER/about/>

42  
43  
44

HelpBeatDiabetes <https://www.researchforthefuture.org/diabetes/>

45  
46

The Nowgen Centre <https://research.cmft.nhs.uk/getting-involved/involvement>

47  
48

The Citizen Scientist project <http://www.citizenscientist.org.uk/>

49  
50  
51

North West People in Research Forum <https://www.northwestpeopleinresearchforum.org/>

Table A. Coding of patient-reported potentially-unsafe scenarios in primary care

| <b>1. Errors in the process of the healthcare delivery system</b>                                                                                                                                                                                                                                                                                                                                                                  |                                                                                                                                                                                                                                                                                                                                             |
|------------------------------------------------------------------------------------------------------------------------------------------------------------------------------------------------------------------------------------------------------------------------------------------------------------------------------------------------------------------------------------------------------------------------------------|---------------------------------------------------------------------------------------------------------------------------------------------------------------------------------------------------------------------------------------------------------------------------------------------------------------------------------------------|
| Makeham 2002, Dovey 2002                                                                                                                                                                                                                                                                                                                                                                                                           | Common threads reported in this study                                                                                                                                                                                                                                                                                                       |
| 1.1. Errors in the process of conducting an administrative task                                                                                                                                                                                                                                                                                                                                                                    | A1. Administrative problem not otherwise specified                                                                                                                                                                                                                                                                                          |
| 1.1.1. Information filed in wrong place or wrong time                                                                                                                                                                                                                                                                                                                                                                              |                                                                                                                                                                                                                                                                                                                                             |
| 1.1.2. Unavailability of information that should have been in patients charts<br>1.1.2.1. Entire chart or part of chart could not be accessed when needed<br>1.1.2.2. Care provided was not documented<br>1.1.2.3. Item(s) of information missing from chart                                                                                                                                                                       | A2. Incorrect notes/inadequate notes/notes not kept up to date                                                                                                                                                                                                                                                                              |
| 1.1.3. Errors in patient's movement through the healthcare delivery system                                                                                                                                                                                                                                                                                                                                                         | A3. Intended referral was not sent or delayed<br>A4. Patient not reminded, informed or assisted to attend regular check-ups or other necessary routine treatments                                                                                                                                                                           |
| 1.1.4. Errors in the taking and distributing of messages                                                                                                                                                                                                                                                                                                                                                                           |                                                                                                                                                                                                                                                                                                                                             |
| 1.1.5. Errors in managing appointments for healthcare                                                                                                                                                                                                                                                                                                                                                                              | A5. Unable to get an appointment/other problems with making appointment<br>A6. Ambulance delayed or did not arrive                                                                                                                                                                                                                          |
| <b>1.2. Errors in the process of investigating a patient's condition</b>                                                                                                                                                                                                                                                                                                                                                           |                                                                                                                                                                                                                                                                                                                                             |
| 1.2.1. Laboratory errors<br>1.2.1.1. Wrong test ordered or test not ordered when appropriate<br>1.2.1.2. Errors in the process of obtaining or processing a laboratory specimen<br>1.2.1.3. Error in the process of physician receiving accurate laboratory results in a timely fashion<br>1.2.1.4. Inappropriate response to an abnormal laboratory result                                                                        | B1. Test results lost or other problem with investigation paperwork<br>B2. Incorrect interpretation of tests or other investigation results<br>B3. Clinician did not consider patient history sufficiently/did not use patient's notes adequately<br>B4. Investigation not thorough enough<br>B5. Not referred when patient felt was needed |
| 1.2.3. Errors in the processes of other investigations<br>1.2.3.1. Wrong test ordered or test not ordered when appropriate<br>1.2.3.2. Errors in the process of obtaining or processing of other diagnostic investigation<br>1.2.3.3. Error in the process of physician receiving accurate test results of other investigation in a timely fashion<br>1.2.3.4. Inappropriate response to an abnormal result of other investigation |                                                                                                                                                                                                                                                                                                                                             |
| <b>1.3. Errors in the process of treating a patient's condition</b>                                                                                                                                                                                                                                                                                                                                                                |                                                                                                                                                                                                                                                                                                                                             |
| 1.3.1. Errors in the process of treating with medications<br>1.3.1.1. Wrong medication or wrong dose of medication ordered or medication not ordered by physician when appropriate<br>1.3.1.2. Error in the process of delivering a medication order or inappropriate medication order by a provider working under physician supervision<br>1.3.1.3. Error in the process of dispensing medication as ordered                      | C1. Medication problem<br>C2. Not provided with medical devices needed to manage long term conditions                                                                                                                                                                                                                                       |

|                                                                                                                                                                                                                               |                                                                                                                                                                                                                                                                                               |
|-------------------------------------------------------------------------------------------------------------------------------------------------------------------------------------------------------------------------------|-----------------------------------------------------------------------------------------------------------------------------------------------------------------------------------------------------------------------------------------------------------------------------------------------|
| 1.3.2. Errors in other treatments                                                                                                                                                                                             | C3. Problem with dental treatment or diagnosis                                                                                                                                                                                                                                                |
| <b>1.4. Errors in the process of communication</b>                                                                                                                                                                            |                                                                                                                                                                                                                                                                                               |
| 1.4.1. Errors in communication between primary healthcare provider and patients                                                                                                                                               | D1. Clinician seemed to lack interest in the patient's health problem or did not listen carefully enough<br>D2. Information about the patient's health had not been passed on to the patient who felt it should have been<br>D3. Communication problem between patient and primary care staff |
| 1.4.2. Errors in communication between healthcare providers                                                                                                                                                                   | D4. Problem with communication between primary care and other types of care including secondary care<br>D5. Disagreement between 2 clinicians                                                                                                                                                 |
| <b>2. Errors arising from lack of clinical knowledge or skills</b>                                                                                                                                                            |                                                                                                                                                                                                                                                                                               |
| 2.1. Errors in the execution of a clinical task<br>2.1.1. Non-clinical staff made the wrong clinical decision<br>2.1.2. Failed to follow standard practice<br>2.1.3. Lacked needed experience or expertise in a clinical task | E1. Administrative staff seemed to make clinical decisions<br>E2. Procedure was not carried out correctly<br>E3. Incorrect advice/no advice given by clinician                                                                                                                                |
| <b>2.2. Errors in diagnosis</b><br>2.2.1. Wrong or delayed diagnosis                                                                                                                                                          | F1. Wrong/late/missed/delayed diagnosis                                                                                                                                                                                                                                                       |
| <b>2.3. Wrong treatment decision</b>                                                                                                                                                                                          | G1. Wrong treatment decision                                                                                                                                                                                                                                                                  |
|                                                                                                                                                                                                                               | H. Other                                                                                                                                                                                                                                                                                      |
|                                                                                                                                                                                                                               | X. Not a problem/ insufficient information/refused/don't know                                                                                                                                                                                                                                 |

Table B. Level 4 coding of patient-reported potentially-unsafe medication scenarios

|                                                                                                                                                                 |
|-----------------------------------------------------------------------------------------------------------------------------------------------------------------|
| Common threads reported in this study grouped as described by Makeham 2002, Dovey 2002                                                                          |
| C1 Medication error not otherwise specified /other problem                                                                                                      |
| • <b>1.3.1.1. Ordering medications (prescribing)</b>                                                                                                            |
| C1.1.1 Prescribed wrong or inappropriate drug                                                                                                                   |
| C1.1.2 Started new prescription or changed prescription without sufficient discussion, follow up or checks                                                      |
| C1.1.3 Long term or continued prescribing without review or consideration of long term or side effects                                                          |
| C1.1.4 Prescribed drug when should have known contra-indicated <i>e.g.</i> patient had informed clinician of allergy, adverse reaction or it was in the records |
| C1.1.5 Repeat prescription unintentionally changed                                                                                                              |
| C1.1.6 Out of date repeat prescription mistakenly re-issued                                                                                                     |
| • <b>1.3.1.2./1.3.1.3. Implementing or receiving medications (dispensing or issuing)</b>                                                                        |
| C1.2.1 Medication not dispensed or administered as intended or prescribed                                                                                       |
| • <b>1.3.1.1./1.3.1.2./1.3.1.3. Ordering, implementing or receiving medications</b>                                                                             |
| C1.3.1 Wrong dose or drug or delivery method                                                                                                                    |
| C1.3.2 Being given another patient's drugs or prescription                                                                                                      |
| C1.3.3 Wrong or inadequate advice about drug effects or how to use                                                                                              |
| C1.3.4 Delay or failure in prescription processing                                                                                                              |

Table C. Demographics of clinicians and members of the public reviewing the patient-reported problems and estimating the likelihood the scenarios describes a potentially-harmful preventable problem occurring in primary care

|                                                                                                                                                                                                                                                                  |                      |
|------------------------------------------------------------------------------------------------------------------------------------------------------------------------------------------------------------------------------------------------------------------|----------------------|
| <b>Demographics of GP and dentist coders</b>                                                                                                                                                                                                                     | <b>frequency n=6</b> |
| <b>Gender</b>                                                                                                                                                                                                                                                    |                      |
| Female                                                                                                                                                                                                                                                           | 3                    |
| Male                                                                                                                                                                                                                                                             | 3                    |
| <b>Years working as a GP or dentist</b>                                                                                                                                                                                                                          |                      |
| Less than 15 years                                                                                                                                                                                                                                               | 1                    |
| 15 to 25 years                                                                                                                                                                                                                                                   | 2                    |
| Over 25 years                                                                                                                                                                                                                                                    | 3                    |
| <b>Current position</b>                                                                                                                                                                                                                                          |                      |
| Partner                                                                                                                                                                                                                                                          | 4                    |
| Retired within last 12 months                                                                                                                                                                                                                                    | 2                    |
| <b>Demographics of the members of the public</b>                                                                                                                                                                                                                 |                      |
| <b>frequency n=7</b>                                                                                                                                                                                                                                             |                      |
| <b>Gender</b>                                                                                                                                                                                                                                                    |                      |
| Female                                                                                                                                                                                                                                                           | 6                    |
| Male                                                                                                                                                                                                                                                             | 1                    |
| <b>Age</b>                                                                                                                                                                                                                                                       |                      |
| 30 to 39 years                                                                                                                                                                                                                                                   | 2                    |
| 40 to 49 years                                                                                                                                                                                                                                                   | 1                    |
| 50 to 59 years                                                                                                                                                                                                                                                   | 2                    |
| 60 to 69 years                                                                                                                                                                                                                                                   | 2                    |
| <b>Ethnicity</b>                                                                                                                                                                                                                                                 |                      |
| White British                                                                                                                                                                                                                                                    | 5                    |
| British Indian                                                                                                                                                                                                                                                   | 2                    |
| <b>Years of PPI experience</b>                                                                                                                                                                                                                                   |                      |
| None                                                                                                                                                                                                                                                             | 2                    |
| Less than 1 year                                                                                                                                                                                                                                                 | 1                    |
| 1 to 5 years                                                                                                                                                                                                                                                     | 2                    |
| Over 5 years                                                                                                                                                                                                                                                     | 2                    |
| <b>Further background information</b>                                                                                                                                                                                                                            |                      |
| PPI reviewer 1. Currently working freelance on education and PPI projects; previously worked in a pastoral role at a college; a lay representative for courses training healthcare scientists.                                                                   |                      |
| PPI reviewer 2. Retired primary school teacher with several long term health conditions; single parent; was a young carer for a parent with a long term condition.                                                                                               |                      |
| PPI reviewer 3. Former higher education administrator; current university tutor; patient partner on varied research projects; carer for family members aged 0-100 with physical and/or mental health long term conditions.                                       |                      |
| PPI reviewer 4. Currently working as a civil servant and has several long term health conditions.                                                                                                                                                                |                      |
| PPI reviewer 5. Full-time parent of school age children; previously ten years working in a medical school in an administrative role and 5 years working in the drug and alcohol sector                                                                           |                      |
| PPI reviewer 6. Lay representative for several healthcare-related professional bodies and involved in health research at several universities; family-carer for over 35 years; has had over 6 years of involvement with a mental and community health as a carer |                      |
| PPI reviewer 7. Retired university administrator; a parent and carer for elderly parents.                                                                                                                                                                        |                      |

Table D. Scoring for likelihood that the patient-reported scenario is potentially-harmful preventable-problem

| Score | How likely do you think it is the patient was correct in thinking that their health might be worsened, or actually was made worse, because of a mistake or a problem in primary care that could have been prevented? Choose from the options below. |
|-------|-----------------------------------------------------------------------------------------------------------------------------------------------------------------------------------------------------------------------------------------------------|
| 5     | Very likely or certain (75-100% confident is a potentially-harmful preventable-problem)                                                                                                                                                             |
| 4     | Probably (50-74% confident is a potentially-harmful preventable-problem)                                                                                                                                                                            |
| 3     | Possibly (25-49% confident is a potentially-harmful preventable-problem)                                                                                                                                                                            |
| 2     | Unlikely (bottom 25% confident is a potentially-harmful preventable-problem)                                                                                                                                                                        |
| 1     | Definitely not a potentially unsafe event (0% chance is a potentially-harmful preventable-problem)                                                                                                                                                  |
| -     | Insufficient information                                                                                                                                                                                                                            |
| -     | Don't know                                                                                                                                                                                                                                          |
| -     | Other - add text at end of row                                                                                                                                                                                                                      |

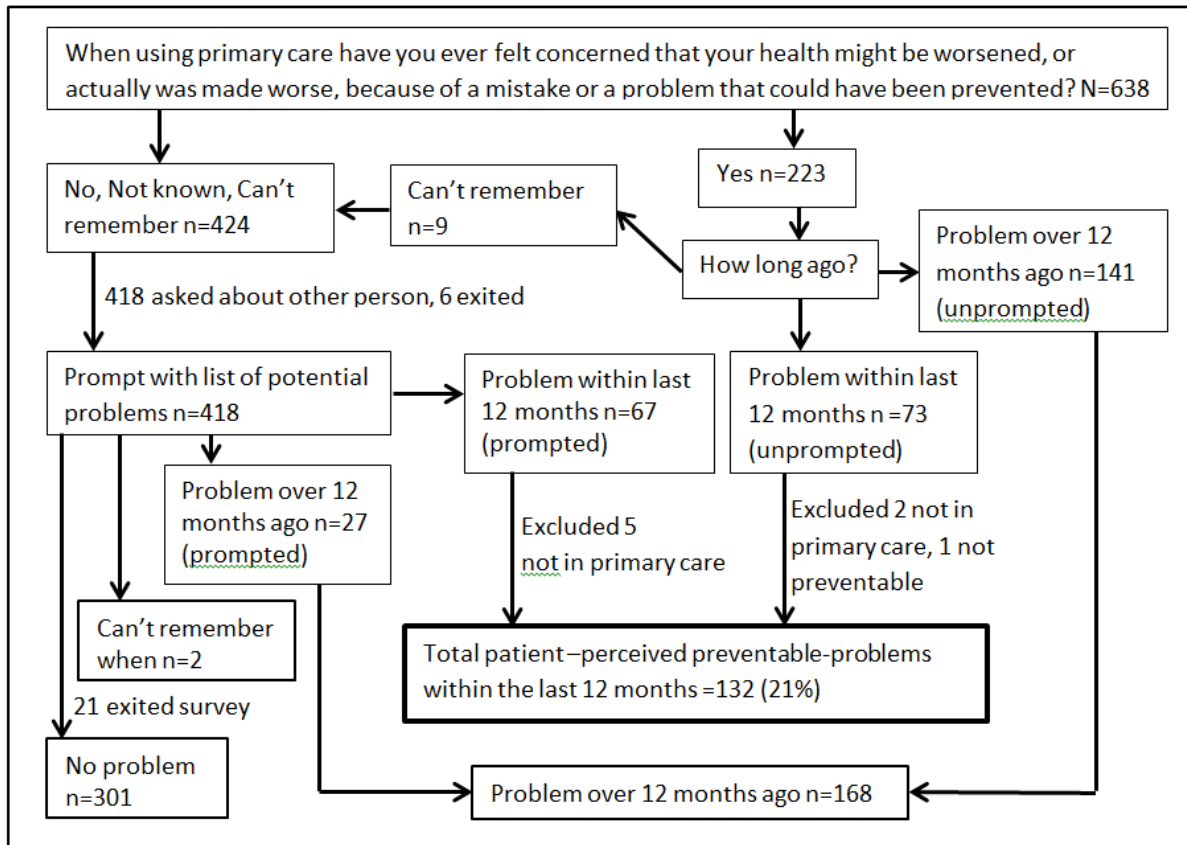

Figure A. Flow chart of participants who reported a potentially-unsafe preventable-problem in primary care through the online pilot survey

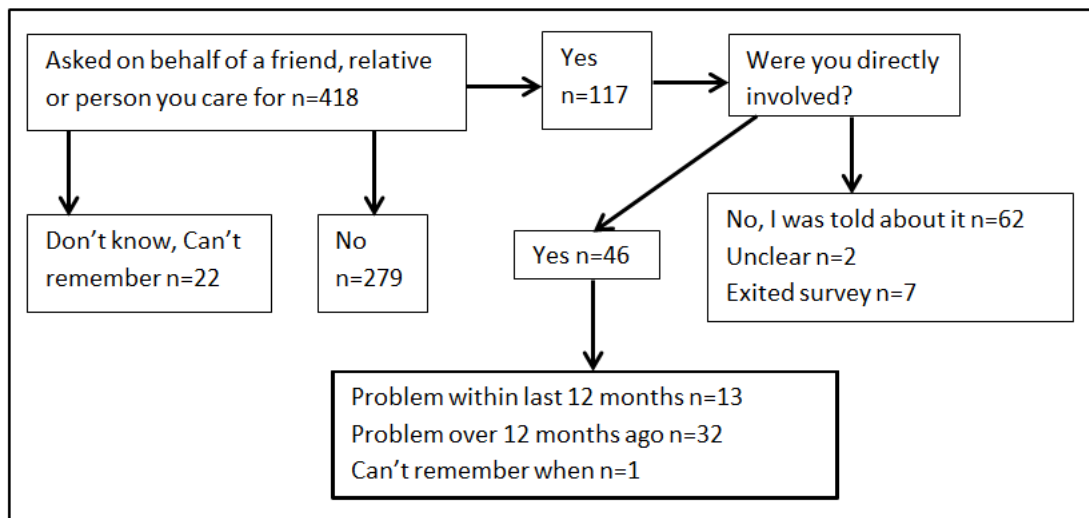

Figure B. Flow chart of participants who reported a potentially-unsafe preventable-problem in primary care on behalf of another person through the online pilot survey

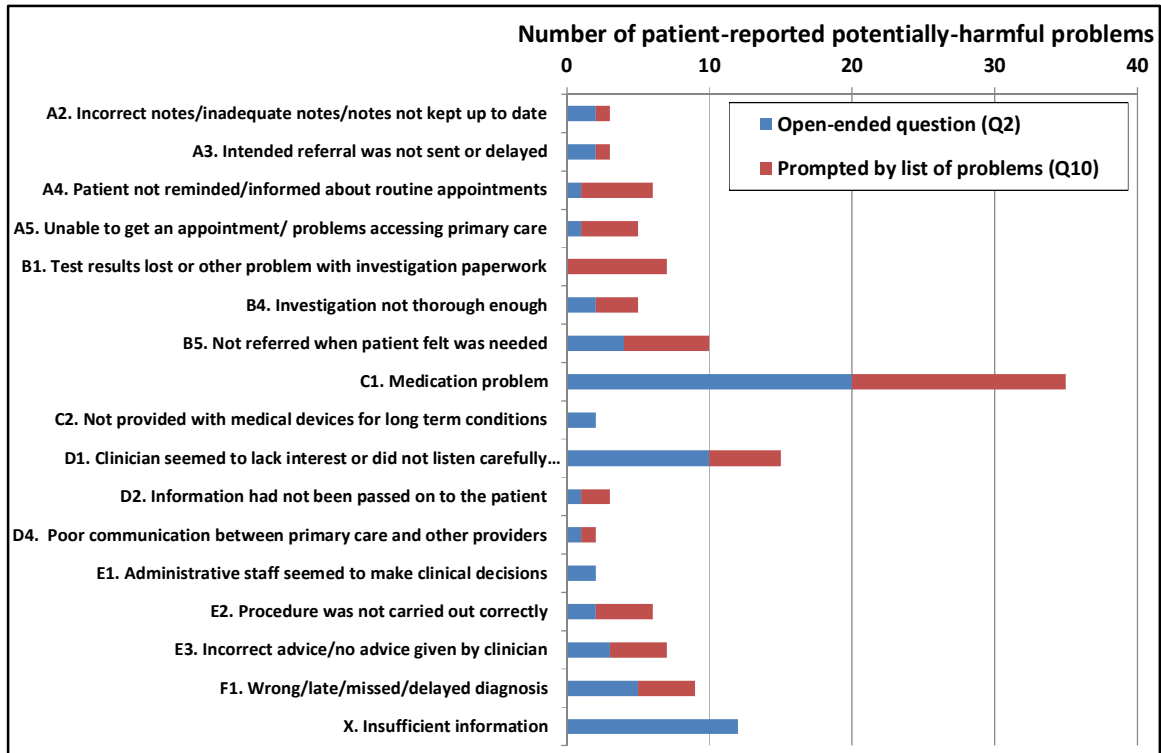

Fig C. Numbers of patient-perceived problems occurring in the last 12 months categorised according to the patient's description (see Table 2) and route through survey *i.e.* originated from open-ended question (Q2) or prompted by list of potential safety problems (Q10)

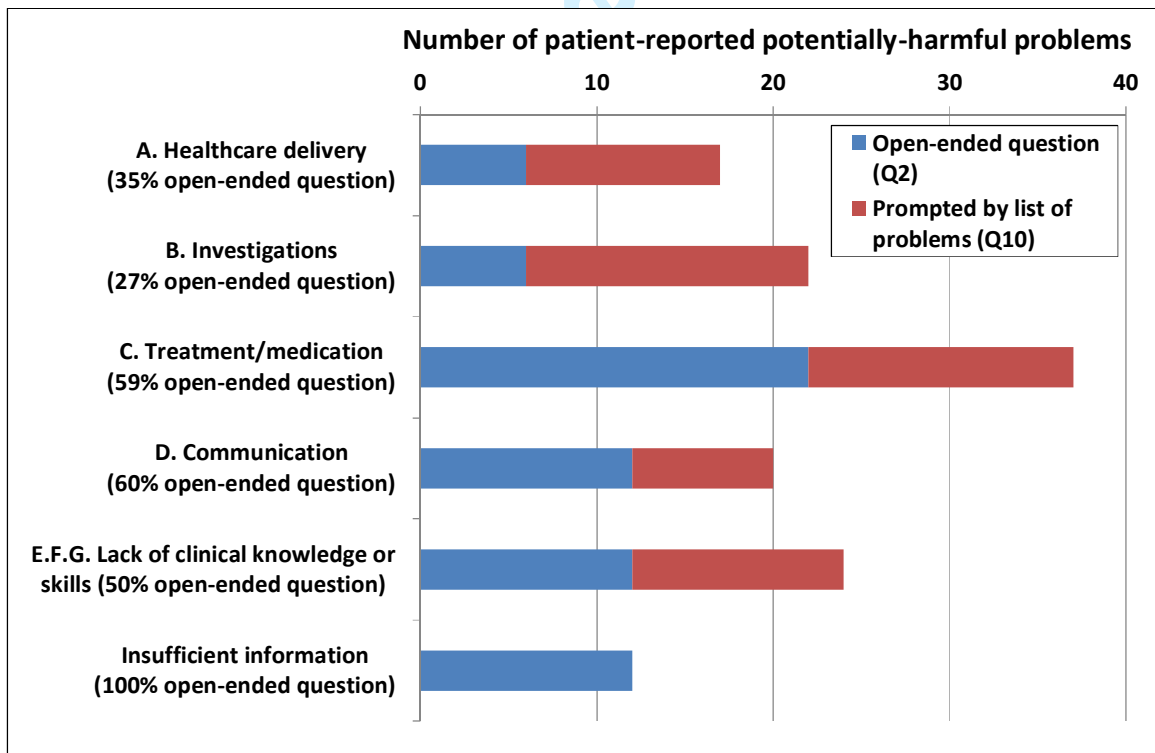

Fig D. Numbers of patient-perceived problems occurring in the last 12 months categorised according to the patient's description coded at a higher level (see Table 2) and route through survey *i.e.* originated from open-ended question (Q2) or prompted by list of potential safety problems (Q10)



## Appendix 2. Boxes 1 to 15

Patient reported scenarios occurring during the past 12 months that GPs scored as higher likelihood to be a potentially-unsafe preventable-problem in primary care (median score is higher than "possibly" and at least 2 GPs gave a score or one GP scored "very likely or certain")

### Scenario1. GP surgery

**Briefly describe the mistake or problem and how it happened.** "Prescription drug, anti-inflammatory for arthritis, caused acute stomach pains & violent vomiting. Repeat prescription for twelve years without any discussion."

**Could the mistake or problem have been avoided? If so how?** "Possible discussion about dangers of continuous taking of prescription drugs, which in the event were stopped after the incident."

**Were you able to talk about the mistake or problem with anybody working in the primary care service?** "No I did not notice the mistake or problem at the time"

**Patient-reported prospect of harm:** suspected your health has been made worse by a problem or error that could have been prevented

**Patient-perspective problem-type code:** C1.1.3 Long term or continued prescribing without review or consideration of long term or side effects

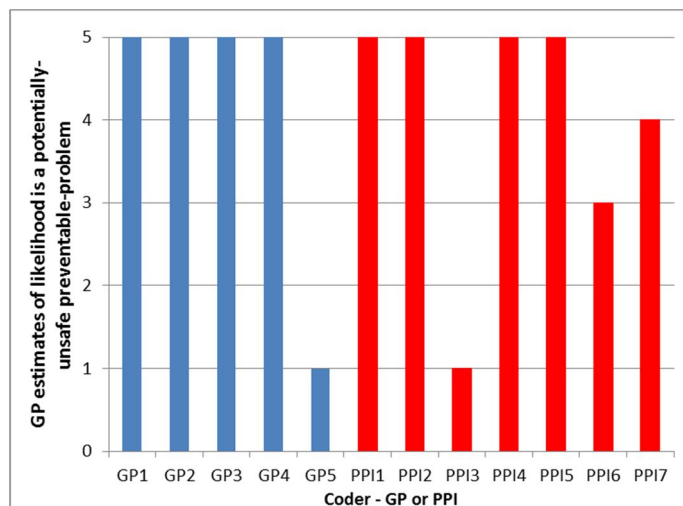

5=very likely or certain, 4=probably, 3=possibly, 2=unlikely, 1=definitely not, 0 = insufficient information or don't know

### Scenario2. GP surgery

**Briefly describe the mistake or problem and how it happened.** "Insulin type was changed by specialist but previous insulin prescribed by GP as notes had not been updated"

**Could the mistake or problem have been avoided? If so how?** "Yes GP notes should have been updated with new medication"

**Were you able to talk about the mistake or problem with anybody working in the primary care service?** "Practice manager resolved the problem and apologised"

**Patient-reported prospect of harm:** prompted via Q10 (Box 1 main paper)

**Patient-perspective problem-type code:** A2. Incorrect notes/inadequate notes/notes not kept up to date; C1.1.6 Out of date repeat prescription mistakenly re-issued

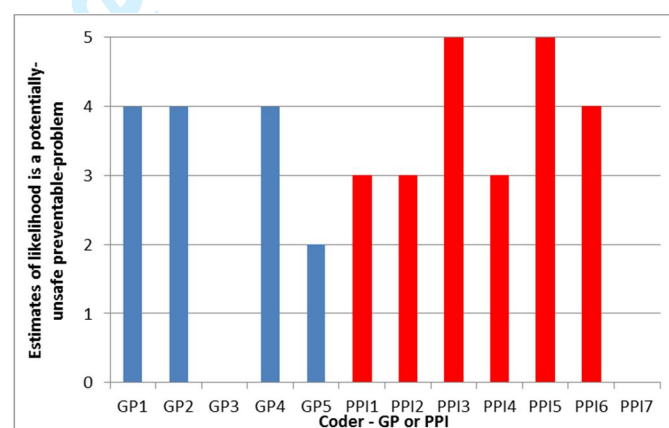

5=very likely or certain, 4=probably, 3=possibly, 2=unlikely, 1=definitely not, 0 = insufficient information or don't know

**Scenario3. GP surgery**

**Briefly describe the mistake or problem and how it happened.** *“Two out of three Doctors not listening to what I was asking; April I had two big bleeds from my Penis, Doctor 1 did a test and gave antibiotics. Went to 2nd Doctor for Diabetic check and told him of problem - nothing except another test come back in ten days. Went to the third doctor who said the test didn't show anything but when I mentioned my feelings about a problem, he look and said yes you do have a problem. In 2 weeks I was in having tests and 3 operations for cancer.”*

**Could the mistake or problem have been avoided? If so how?** *“Listen to me”*

**Were you able to talk about the mistake or problem with anybody working in the primary care service?** *“No, I could not find anybody with whom I could discuss the mistake or problem (The third doctor was amazing with me. He said to keep in touch and if I had any problems to ring him and he still wants me to ring him after my three operations.)”*

**Patient-reported prospect of harm:** suspected your health has been made worse by a problem or error that could have been prevented

**Patient-perspective problem-type code:** D1. Clinician seemed to lack interest in the patient’s health problem or did not listen carefully enough; F1. Wrong/late/missed/delayed diagnosis



5=very likely or certain, 4=probably, 3=possibly, 2=unlikely, 1=definitely not, 0 = insufficient information or don't know

**Scenario4. GP surgery**

**Briefly describe the mistake or problem and how it happened.** *“Changed diabetes medication to an alternative which my notes from 1980's should show I respond badly to”*

**Could the mistake or problem have been avoided? If so how?** *“Read the notes on every medication change but unfortunately that is unrealistic under the time restrictions on GP's. Put early notes on-line and flag medication allergies/problems.”*

**Were you able to talk about the mistake or problem with anybody working in the primary care service?** *“Yes, my own GP who had returned from holiday”*

**Patient-reported prospect of harm:** suspected your health has been made worse by a problem or error that could have been prevented

**Patient-perspective problem-type code:** C1.1.4 Prescribed drug when should have known contra-indicated e.g. patient had informed clinician of allergy, adverse reaction or it was in the records



5=very likely or certain, 4=probably, 3=possibly, 2=unlikely, 1=definitely not, 0 = insufficient information or don't know

**Scenario5. GP surgery**

**Briefly describe the mistake or problem and how it happened.** *“Told the GP the medication was making my hair fall out & he kept me on it for another 3 months. I had to see another GP to get him to change my medication. In the meantime I have lost 3/4 of my hair. Not sure if it will ever grow back.”*

**Could the mistake or problem have been avoided? If so how?** *“yes, by the GP listening to*

*what I was saying.”*

**Were you able to talk about the mistake or problem with anybody working in the primary care service?** *“Yes, GP”*

**Patient-reported prospect of harm:** suspected your health has been made worse by a problem or error that could have been prevented

**Patient-perspective problem-type code:** D1. Clinician seemed to lack interest in the patient’s health problem or did not listen carefully enough; C1.1.3 Long term or continued prescribing without review or consideration of long term or side effects

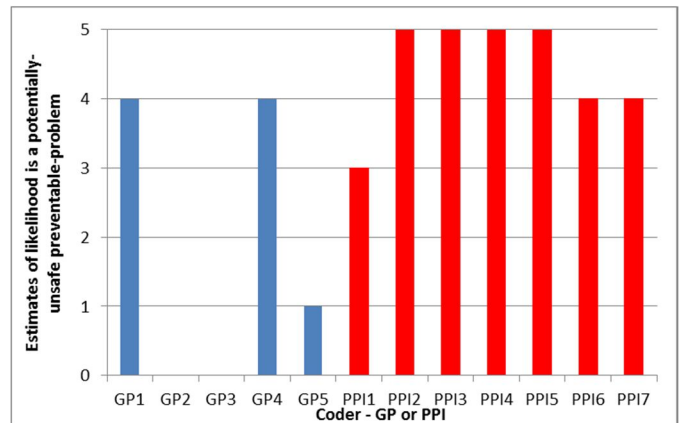

5=very likely or certain, 4=probably, 3=possibly, 2=unlikely, 1=definitely not, 0 = insufficient information or don't know

**Scenario6. GP surgery**

**Briefly describe the mistake or problem and how it happened.** *“Successfully treated for prostate cancer 2006 but suffered some loss of sexual performance; Viagra recommended BUT I take isosorbide nitrate for a following heart attack; the two are contradictory and could produce further heart problems. A routine diabetes check-up at which the sexual problem was discussed saw an automatic prescribing of Viagra; obviously without reference to my medical records.”*

**Could the mistake or problem have been avoided? If so how?** *“Read the medical notes.”*

**Were you able to talk about the mistake or problem with anybody working in the primary care service?** *“No; I felt I was going to cause trouble”*

**Patient-reported prospect of harm:** prompted via Q10 (Box 1 main paper)

**Patient-perspective problem-type code:** C1.1.1 Prescribed wrong or inappropriate drug

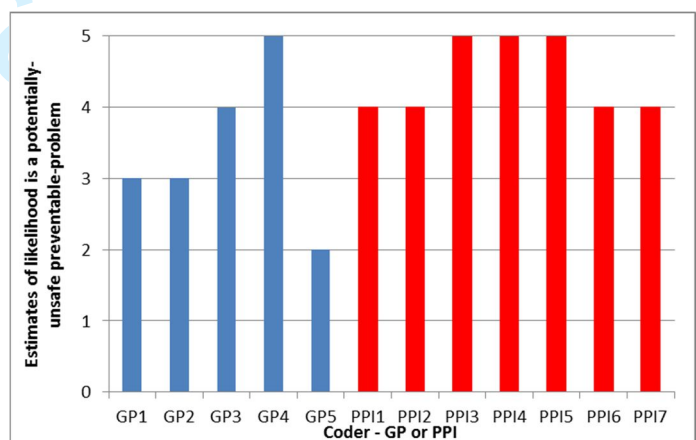

5=very likely or certain, 4=probably, 3=possibly, 2=unlikely, 1=definitely not, 0 = insufficient information or don't know

**Scenario7. GP surgery**

**Briefly describe the mistake or problem and how it happened.** *“I was given steroids for a chest infection but not alerted to the fact they make your sugars go massively high! Within a few hours I was high and not able to bring them down, fearing a DKA I headed for the hospital to correct a very easily avoidable issue. I also attended my GP 6 years ago to be given strong antacids for pain in my stomach that was actually a DKA I was admitted to hospital a few hours later! The GP never even*

*suggested it could be linked to my diabetes and as it was my first DKA I had no idea that's how they can feel”*

**Could the mistake or problem have been avoided? If so how?** *“Both could have been avoided The steroids - if the prescribing nurse had considered my diabetes I'd have been given proper advice as to how to deal with them as a diabetic or given different meds. The DKA simple questions or explanation as to how DKAs can present would have made me family and the doctor realise I was in trouble.”*

**Were you able to talk about the mistake or problem with anybody working in the primary care service?** *“I wrote a letter to the surgery concerning the steroids anonymously to alert them of my concern and the DKA. I was too poorly to even consider seeking correction or explanation”*

**Patient-reported prospect of harm:** health was actually made worse by a problem or error that could have been prevented

**Patient-perspective problem-type code:** C1.1.4 Prescribed drug when should have known contra-indicated e.g. patient had informed clinician of allergy, adverse reaction or it was in the records; E3. Incorrect advice/no advice given by clinician

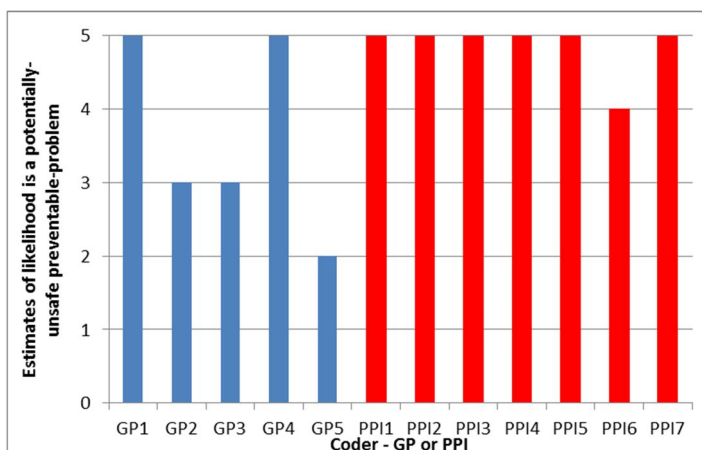

5=very likely or certain, 4=probably, 3=possibly, 2=unlikely, 1=definitely not, 0 = insufficient information or don't know

**Scenario8. GP surgery**

**Briefly describe the mistake or problem and how it happened.** *“reception staff making clinical decisions which were at odds with what had been discussed with my GP”*

**Could the mistake or problem have been avoided? If so how?** *“Yes, reception staff shouldn't be making clinical decisions”*

**Were you able to talk about the mistake or problem with anybody working in the primary care service?** *“No, had the opportunity but did not feel comfortable to discuss the mistake or problem”*

**Patient-reported prospect of harm:** suspected your health has been made worse by a problem or error that could have been prevented

**Patient-perspective problem-type code:** E1. Administrative staff seemed to make clinical decisions

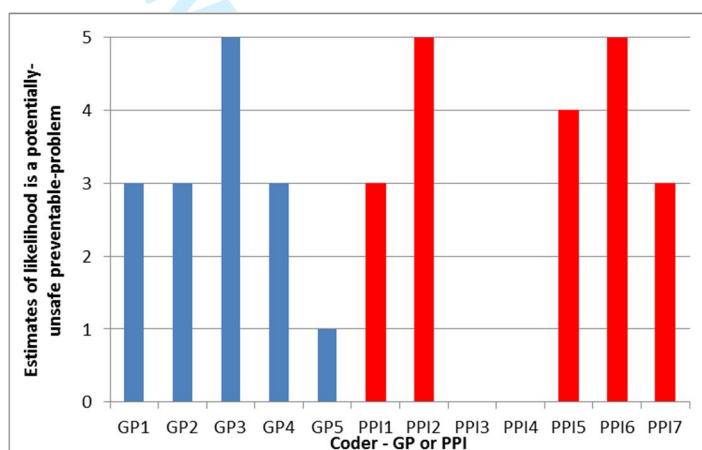

5=very likely or certain, 4=probably, 3=possibly, 2=unlikely, 1=definitely not, 0 = insufficient information or don't know

**Scenario9. Pharmacist**

**Briefly describe the mistake or problem and how it happened.** *"I was given a medicine belonging to somebody else as part of my monthly repeat prescription"*

**Could the mistake or problem have been avoided? If so how?** *"More care and attention when checking"*

**Were you able to talk about the mistake or problem with anybody working in the primary care service?** *"Yes, pharmacist"*

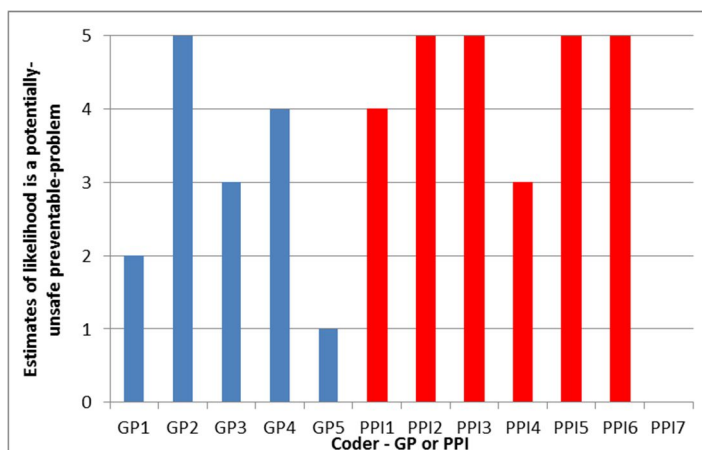

**Patient-reported prospect of harm:** prompted via Q10 (Box 1 main paper)

5=very likely or certain, 4=probably, 3=possibly, 2=unlikely, 1=definitely not, 0 = insufficient information or don't know

**Patient-perspective problem-type code:** C1.3.3 Wrong or inadequate advice about drug effects or how to use

**Scenario10. GP surgery**

**Briefly describe the mistake or problem and how it happened.** *"Poor diabetic annual review, foot check not correctly done just tested my foot pulses and nothing else"*

**Could the mistake or problem have been avoided? If so how?** *"Better training of staff"*

**Were you able to talk about the mistake or problem with anybody working in the primary care service?** *"No, had the opportunity but did not feel comfortable to discuss the mistake or problem"*

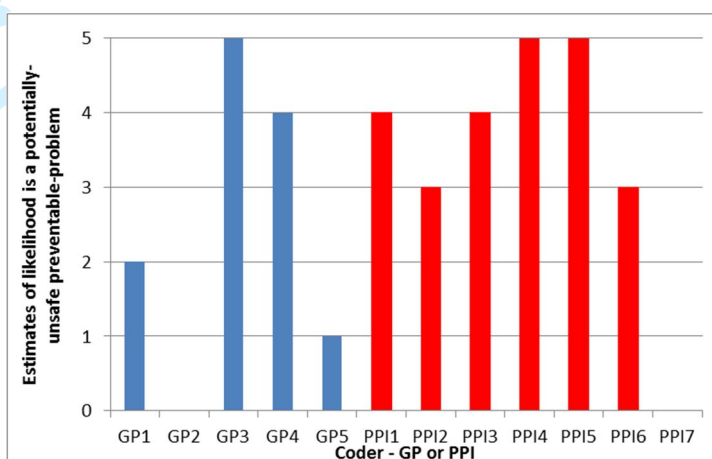

**Patient-reported prospect of harm:** suspected your health has been made worse by a problem or error that could have been prevented

5=very likely or certain, 4=probably, 3=possibly, 2=unlikely, 1=definitely not, 0 = insufficient information or don't know

**Patient-perspective problem-type code:** E2. Procedure was not carried out correctly

**Scenario11. GP surgery**

**Briefly describe the mistake or problem and how it happened.** *“Prior to a pain killing injection into my knee, I asked the GP who suggested the injection AND the GP who carried out the injection whether, as someone living with Type 1 diabetes, it would have any effect on my blood glucose levels. On both occasions, I was given an unequivocal No . In the event, within a few hours of the injection, my blood glucose rose significantly and remained high for several days. I felt unable to eat anything for 24 hours while I took on more and more insulin in order to bring my glucose levels down - I did not want to go to sleep that night simply because of the massive amount of insulin in my system.”*

**Could the mistake or problem have been avoided? If so how?** *“Yes. I feel that both GPs should have a knowledge about the side effects of drugs they prescribe, administer and recommend.”*

**Were you able to talk about the mistake or problem with anybody working in the primary care service?** *“No I could not find anybody with whom I could discuss the mistake or problem”*

**Patient-reported prospect of harm:** your health has been made worse by a problem or error that could have been prevented

**Patient-perspective problem-type code:** E3. Incorrect advice/no advice given by clinician

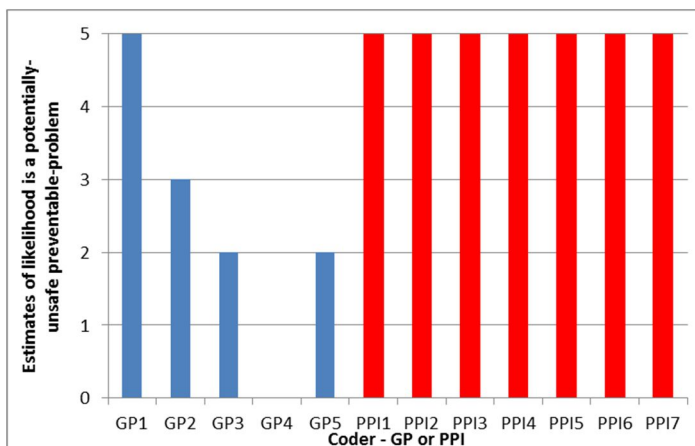

5=very likely or certain, 4=probably, 3=possibly, 2=unlikely, 1=definitely not, 0 = insufficient information or don't know

**Scenario12. GP surgery**

**Briefly describe the mistake or problem and how it happened.** *“GP completely overlooked symptoms and prescribed antibiotic after antibiotic without investigation or referral”*

**Could the mistake or problem have been avoided? If so how?** *“Yes by listening to history of complaints, carrying out appropriate tests instead of just giving antibiotics”*

**Were you able to talk about the mistake or problem with anybody working in the primary care service?** *“No I did not notice the mistake or problem at the time”*

**Patient-reported prospect of harm:** prompted via Q10 (Box 1 main paper)

**Patient-perspective problem-type code:** D1. Clinician seemed to lack interest in the patient's health problem or did not listen carefully enough; F1. Wrong/late/missed/delayed diagnosis

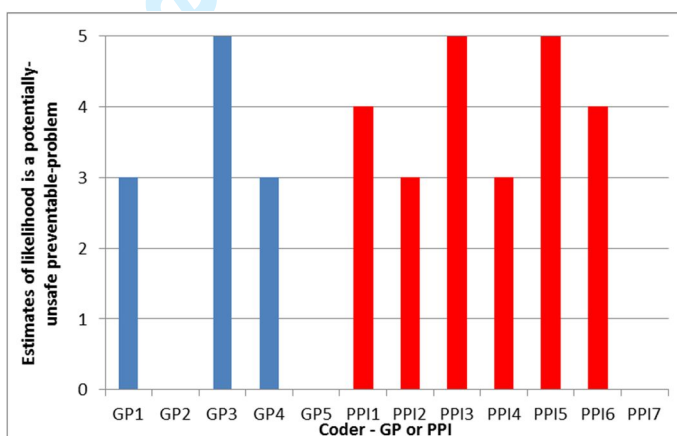

5=very likely or certain, 4=probably, 3=possibly, 2=unlikely, 1=definitely not, 0 = insufficient information or don't know

**Scenario13. GP surgery**

**Briefly describe the mistake or problem and how it happened.** *“Several times prescriptions have been incorrectly issued due to similar names for drugs or the same name with different strengths”*

**Could the mistake or problem have been avoided? If so how?** *“Yes, by more accurate or double data entry. Now solved by self-request using web systems.”*

**Were you able to talk about the mistake or problem with anybody working in the primary care service?** *“Yes, they did not want to know or seem to care unless a formal complaint was made”*

**Patient-reported prospect of harm:** your health has been made worse by a problem or error that could have been prevented

**Patient-perspective problem-type code:** C1.1.5 Repeat prescription unintentionally changed

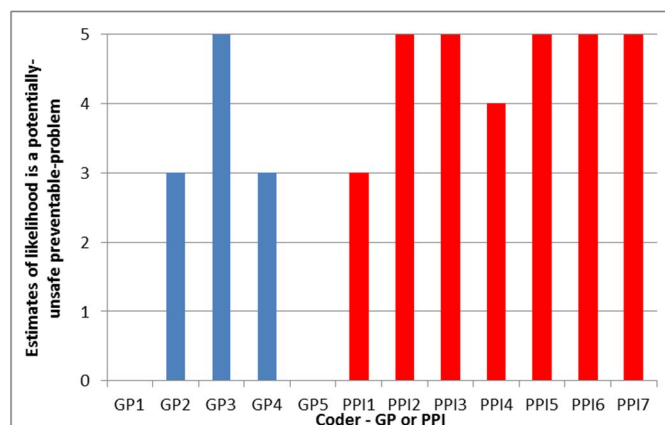

5=very likely or certain, 4=probably, 3=possibly, 2=unlikely, 1=definitely not, 0 = insufficient information or don't know

**Scenario14. GP surgery**

**Briefly describe the mistake or problem and how it happened.** *“A simple error occurred with an incorrect prescription. When I tried to bring this to the attention of the receptionist she treated me with disdain and in a challenging manner. She then proceeded to start to read my notes aloud in the public reception area. I felt that this was unacceptable behaviour. When I tried to tackle the receptionist about her behaviour I felt as if I was under threat. It caused me to feel very stressed, frustrated and ill tempered.”*

**Could the mistake or problem have been avoided? If so how?** *“If the receptionist had been willing to listen to what I was saying.”*

**Were you able to talk about the mistake or problem with anybody working in the primary care service?** *“I did speak to a lady who said she was the practice manager but I felt that they were not interested in resolving the problem”*

**Patient-reported prospect of harm:** suspected your health has been made worse by a problem or error that could have been prevented

**Patient-perspective problem-type code:** D3. Communication problem between patient and primary care staff; C1 Medication error not otherwise specified /other problem

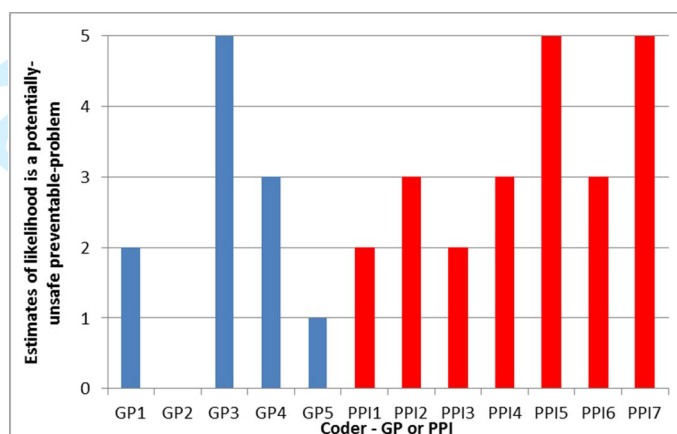

5=very likely or certain, 4=probably, 3=possibly, 2=unlikely, 1=definitely not, 0 = insufficient information or don't know

**Scenario15. GP Surgery**

**Briefly describe the mistake or problem and how it happened.**

*“Went to see GP because I feared the pain in one of my legs may have been Peripheral Artery Disease - hardening of the arteries, having had a (non-blood) relative who suffered from this and subsequently died - of a heart attack. Oh yes, said the GP, well, you will have it won't you? Why? I asked expecting her to say eg because you are a smoker, or maybe my age (65) or something else I wasn't aware of. But what she actually told me was 'Because you are a diabetic!' Whaaat? I exclaimed - you mean ALL diabetics will inevitably get this, and there's no way to prevent it? Yes she said and shrugged. I said 'Thanks for nothing then' and left. Instead I left, came home and went straight on-line to make an appointment with someone more sensible, which I did and after taking my leg/ankle pulses and BPs etc - he chatted to me and said he would refer me for a cardiology consultation at the hospital. This IS what I expected in the first place and now it IS being taken care of.”*

**Could the mistake or problem have been avoided? If so how?** *“By training the GP properly in the first place”*

**Were you able to talk about the mistake or problem with anybody working in the primary care service?** *“? “I explained to GP 2 But I don't know what if anything was done about it, or how I could find that out.”*

**Patient-reported prospect of harm:** your health has been made worse by a problem or error that could have been prevented

**Patient-perspective problem-type code:** D1. Clinician seemed to lack interest in the patient’s health problem or did not listen carefully enough



5=very likely or certain, 4=probably, 3=possibly, 2=unlikely, 1=definitely not, 0 = insufficient information or don't know

1  
2  
3  
4  
5  
6  
7  
8  
9  
10  
11  
12  
13  
14  
15  
16  
17  
18  
19  
20  
21  
22  
23  
24  
25  
26  
27  
28  
29  
30  
31  
32  
33  
34  
35  
36  
37  
38  
39  
40  
41  
42  
43  
44  
45  
46  
47  
48  
49  
50  
51  
52  
53  
54  
55  
56  
57  
58  
59  
60



1  
2  
3  
4  
5  
6  
7  
8  
9  
10  
11  
12  
13  
14  
15  
16  
17  
18  
19  
20  
21  
22  
23  
24  
25  
26  
27  
28  
29  
30  
31  
32  
33  
34  
35  
36  
37  
38  
39  
40  
41  
42  
43  
44  
45  
46  
47  
48  
49  
50  
51  
52  
53  
54  
55  
56  
57  
58  
59  
60

Appendix 2. Boxes 16 to 23

Patient reported scenarios occurring during the past 12 months that PPIs scored as higher likelihood to be a potentially-unsafe preventable-problem in primary care compared with GPs

**Scenario16. GP Surgery**

**Briefly describe the mistake or problem and how it happened.** *"I had a severe reaction to Atorvastatin after a dose increase so much so that I was almost immobile and took 4 months to recover"*

**Could the mistake or problem have been avoided? If so how?** *"According to guidelines I should have been on the increased dose - it took a long time to convince the GP that I needed blood tests to find out why I couldn't walk. My GP was very hesitant to admit that I did have a reaction to statins."*

**Were you able to talk about the mistake or problem with anybody working in the primary care service?**

*"No I could not find anybody with whom I could discuss the mistake or problem. It was not really the GPs fault per se, just took a lot of convincing that there was a problem"*

**Patient-reported prospect of harm:** health could have been made worse had someone not noticed a problem or error

**Patient-perspective problem-type code:** C1.1.3 Long term or continued prescribing without review or consideration of long term or side effects

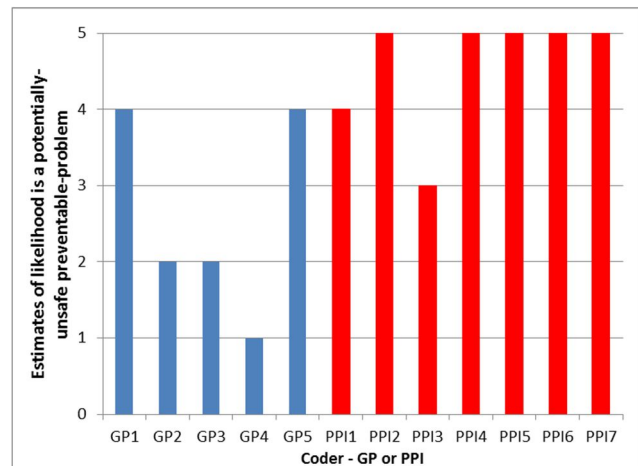

5=very likely or certain, 4=probably, 3=possibly, 2=unlikely, 1=definitely not, 0 = insufficient information or don't know

**Scenario17. GP Surgery**

**Briefly describe the mistake or problem and how it happened.** *“Doctor kept saying I had vitamin deficiency B1, it turned out I had peripheral neuropathy which is very painful”*

**Could the mistake or problem have been avoided? If so how?** *“I just needed the proper medication to help”*

**Were you able to talk about the mistake or problem with anybody working in the primary care service?** *“Just saw another Doctor and she knew straight away what the problem was - she was experienced with Diabetic problems. Yes had the opportunity but did not feel comfortable to discuss the mistake or problem”*

**Patient-reported prospect of harm:** prompted via Q10 (Box 1 main paper)

**Patient-perspective problem-type code:** F1. Wrong/late/missed/delayed diagnosis



5=very likely or certain, 4=probably, 3=possibly, 2=unlikely, 1=definitely not, 0 = insufficient information or don't know

**Scenario18. GP Surgery**

**Briefly describe the mistake or problem and how it happened.** *“Incapable diabetic doctor trying to take blood out the back of my hand haphazardly, not listening and resulting in me fitting and the student watching having to get help.”*

**Could the mistake or problem have been avoided? If so how?** *“Yes. By listening to me”*

**Were you able to talk about the mistake or problem with anybody working in the primary care service?** *“No I could not find anybody with whom I could discuss the mistake or problem”*

**Patient-reported prospect of harm:** prompted via Q10 (Box 1 main paper)

**Patient-perspective problem-type code:** E2.

Procedure was not carried out correctly; D1. Clinician seemed to lack interest in the patient's health problem or did not listen carefully enough



5=very likely or certain, 4=probably, 3=possibly, 2=unlikely, 1=definitely not, 0 = insufficient information or don't know

**Scenario19. Dental Surgery**

**Briefly describe the mistake or problem and how it happened.** *"I had an infection under my wisdom tooth. They agreed that the only way to solve the problem was to take the tooth out. They gave me an appointment to do this in 6 weeks. I am a type 1 diabetic and the infection was affecting my blood sugars and I was concerned that I would have to go to A&E if my blood sugars continued to rise due to the infection. It would have affected my health if I had not paid to go to a private dentist."*

**Could the mistake or problem have been avoided? If so how?** *"They could have taken out the tooth straight away. I was happy to wait at the emergency dentist for them to do this."*

**Were you able to talk about the mistake or problem with anybody working in the primary care service?** *"I explained but they said I would have to wait. They also asked if I needed a sugary drink when I said that my sugars were high so I was too scared to eat and had not eaten in 12hrs. It was clear they didn't understand diabetes."*

**Patient-reported prospect of harm:** health could have been made worse had someone not noticed a problem or error

**Patient-perspective problem-type code:** A5. Unable to get an appointment/other problems with making appointment



5=very likely or certain, 4=probably, 3=possibly, 2=unlikely, 1=definitely not, 0 = insufficient information or don't know

**Scenario20. Dental Surgery**

**Briefly describe the mistake or problem and how it happened.** *"Caries, cavities and problem with crown not diagnosed or treated"*

**Could the mistake or problem have been avoided? If so how?** *"Better dentist & not working to tight time-scale imposed by company owning dental surgery"*

**Were you able to talk about the mistake or problem with anybody working in the primary care service?** *"No I could not find anybody with whom I could discuss the mistake or problem"*

**Patient-reported prospect of harm:** prompted via Q10 (Box 1 main paper)

**Patient-perspective problem-type code:** C3. Problem with dental treatment or diagnosis



5=very likely or certain, 4=probably, 3=possibly, 2=unlikely, 1=definitely not, 0 = insufficient information or don't know

**Scenario21** GP Surgery

**Briefly describe the mistake or problem and how it happened.** *“Using the summary on discharge from hospital, one GP transcribed incorrectly on to my electronic notes ie size of ovarian cyst was 7.5cms and he put 7.5 mms. Another GP requested diagnostic bone density scan but either forgot or did not record it and she ended up questioning why I had it and who requested it. She also referred me for an orthopedic consultation then said I was not funded for the steroid injection put into my swollen elbows.”*



**Could the mistake or problem have been avoided? If so how?** *“Yes”*

5=very likely or certain, 4=probably, 3=possibly, 2=unlikely, 1=definitely not, 0 = insufficient information or don't know

**Were you able to talk about the mistake or problem with anybody working in the primary care service?** *“I was too scared to discuss my concerns for fear of being labelled a trouble maker”*

**Patient-reported prospect of harm:** health could have been made worse had someone not noticed a problem or error

**Patient-perspective problem-type code:** A2. Incorrect notes/inadequate notes/notes not kept up to date

**Scenario22.** GP Surgery

**Briefly describe the mistake or problem and how it happened.** *“GP prescribed pills, but then got phone call saying not to take them”*

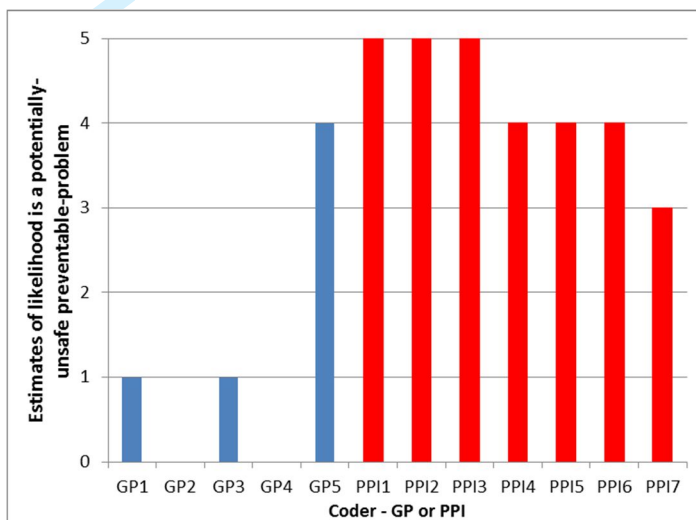

**Could the mistake or problem have been avoided? If so how?** *“Not sure”*

5=very likely or certain, 4=probably, 3=possibly, 2=unlikely, 1=definitely not, 0 = insufficient information or don't know

**Were you able to talk about the mistake or problem with anybody working in the primary care service?** *“No I was not concerned about the problem”*

**Patient-reported prospect of harm:** prompted via Q10 (Box 1 main paper)

**Patient-perspective problem-type code:** C1. Medication problem

**Scenario23. GP Surgery**

**Briefly describe the mistake or problem and how it happened.** *"I had a burst appendix and peritonitis, something that even a scan couldn't detect adequately. My first visit to GP was when I said I think I have appendicitis, no other symptoms only the pain. It was ten days before seeing a consultant, a further 10 days to have a scan, then 2 weeks to be told that I had a lump on my colon which is what my GP had said 5 weeks previously. It was a further 2 weeks before I had surgery."*

**Could the mistake or problem have been avoided? If so how?** *"If my GP had referred me for a scan immediately it would have saved 3 weeks out of the seven. It was two weeks from scan to results and I hear that is usual, but they're not looking at them for 2 weeks"*

**Were you able to talk about the mistake or problem with anybody working in the primary care service?** *"Had the outcome been different my widow might have pursued the matter further. The system is at fault rather than any individual."*

**Patient-reported prospect of harm:** your health has been made worse by a problem or error that could have been prevented

**Patient-perspective problem-type code:** B5. Not referred when patient felt was needed



5=very likely or certain, 4=probably, 3=possibly, 2=unlikely, 1=definitely not, 0 = insufficient information or don't know

STROBE Statement—Checklist of items that should be included in reports of *cross-sectional studies*

|                              | Item No | Recommendation                                                                                                                                                                                                                                                                                                                                                                                                                                                                                         |
|------------------------------|---------|--------------------------------------------------------------------------------------------------------------------------------------------------------------------------------------------------------------------------------------------------------------------------------------------------------------------------------------------------------------------------------------------------------------------------------------------------------------------------------------------------------|
| <b>Title and abstract</b>    | 1       | (a) Indicate the study's design with a commonly used term in the title or the abstract<br>Yes p1                                                                                                                                                                                                                                                                                                                                                                                                       |
|                              |         | (b) Provide in the abstract an informative and balanced summary of what was done and what was found yes p2                                                                                                                                                                                                                                                                                                                                                                                             |
| <b>Introduction</b>          |         |                                                                                                                                                                                                                                                                                                                                                                                                                                                                                                        |
| Background/rationale         | 2       | Explain the scientific background and rationale for the investigation being reported<br>Yes p3                                                                                                                                                                                                                                                                                                                                                                                                         |
| Objectives                   | 3       | State specific objectives, including any prespecified hypotheses yes p3-4                                                                                                                                                                                                                                                                                                                                                                                                                              |
| <b>Methods</b>               |         |                                                                                                                                                                                                                                                                                                                                                                                                                                                                                                        |
| Study design                 | 4       | Present key elements of study design early in the paper yes p4                                                                                                                                                                                                                                                                                                                                                                                                                                         |
| Setting                      | 5       | Describe the setting, locations, and relevant dates, including periods of recruitment, exposure, follow-up, and data collection yes p4                                                                                                                                                                                                                                                                                                                                                                 |
| Participants                 | 6       | (a) Give the eligibility criteria, and the sources and methods of selection of participants yes p4                                                                                                                                                                                                                                                                                                                                                                                                     |
| Variables                    | 7       | Clearly define all outcomes, exposures, predictors, potential confounders, and effect modifiers. Give diagnostic criteria, if applicable yes box 1, online appendix 1                                                                                                                                                                                                                                                                                                                                  |
| Data sources/<br>measurement | 8*      | For each variable of interest, give sources of data and details of methods of assessment (measurement). Describe comparability of assessment methods if there is more than one group yes p5, online appendix 1                                                                                                                                                                                                                                                                                         |
| Bias                         | 9       | Describe any efforts to address potential sources of bias yes p4                                                                                                                                                                                                                                                                                                                                                                                                                                       |
| Study size                   | 10      | Explain how the study size was arrived at n/a as is a pilot study.                                                                                                                                                                                                                                                                                                                                                                                                                                     |
| Quantitative variables       | 11      | Explain how quantitative variables were handled in the analyses. If applicable, describe which groupings were chosen and why yes p5, table2                                                                                                                                                                                                                                                                                                                                                            |
| Statistical methods          | 12      | (a) Describe all statistical methods, including those used to control for confounding yes p5<br>(b) Describe any methods used to examine subgroups and interactions, yes just chi2 tests p5<br>(c) Explain how missing data were addressed all missing data is listed in the tables so it is completely transparent how this was dealt with, there were few missing data<br>(d) If applicable, describe analytical methods taking account of sampling n/a<br>(e) Describe any sensitivity analyses n/a |
| <b>Results</b>               |         |                                                                                                                                                                                                                                                                                                                                                                                                                                                                                                        |
| Participants                 | 13*     | (a) Report numbers of individuals at each stage of study—eg numbers potentially eligible, examined for eligibility, confirmed eligible, included in the study, completing follow-up, and analysed yes online appendix 1<br>(b) Give reasons for non-participation at each stage yes online appendix 1<br>(c) Consider use of a flow diagram yes online appendix 1                                                                                                                                      |
| Descriptive data             | 14*     | (a) Give characteristics of study participants (eg demographic, clinical, social) and information on exposures and potential confounders yes table 1<br>(b) Indicate number of participants with missing data for each variable of interest yes all tables                                                                                                                                                                                                                                             |
| Outcome data                 | 15*     | Report numbers of outcome events or summary measures yes all tables                                                                                                                                                                                                                                                                                                                                                                                                                                    |
| Main results                 | 16      | (a) Give unadjusted estimates and, if applicable, confounder-adjusted estimates and their precision (eg, 95% confidence interval). Make clear which confounders were                                                                                                                                                                                                                                                                                                                                   |

|                          |    |                                                                                                                                                                                            |
|--------------------------|----|--------------------------------------------------------------------------------------------------------------------------------------------------------------------------------------------|
|                          |    | adjusted for and why they were included <b>yes table 3</b>                                                                                                                                 |
|                          |    | (b) Report category boundaries when continuous variables were categorized <b>yes all tables</b>                                                                                            |
|                          |    | (c) If relevant, consider translating estimates of relative risk into absolute risk for a meaningful time period <b>not appropriate as pilot study with self-selected sample</b>           |
| Other analyses           | 17 | Report other analyses done—eg analyses of subgroups and interactions, and sensitivity analyses <b>table 6 considers demographics for problems more likely to be a potentially harmful.</b> |
| <b>Discussion</b>        |    |                                                                                                                                                                                            |
| Key results              | 18 | Summarise key results with reference to study objectives <b>yes p7</b>                                                                                                                     |
| Limitations              | 19 | Discuss limitations of the study, taking into account sources of potential bias or imprecision. Discuss both direction and magnitude of any potential bias <b>yes p8</b>                   |
| Interpretation           | 20 | Give a cautious overall interpretation of results considering objectives, limitations, multiplicity of analyses, results from similar studies, and other relevant evidence <b>yes p7-8</b> |
| Generalisability         | 21 | Discuss the generalisability (external validity) of the study results <b>yes p8, not generalisable</b>                                                                                     |
| <b>Other information</b> |    |                                                                                                                                                                                            |
| Funding                  | 22 | Give the source of funding and the role of the funders for the present study and, if applicable, for the original study on which the present article is based <b>yes p9</b>                |

\*Give information separately for exposed and unexposed groups.

**Note:** An Explanation and Elaboration article discusses each checklist item and gives methodological background and published examples of transparent reporting. The STROBE checklist is best used in conjunction with this article (freely available on the Web sites of PLoS Medicine at <http://www.plosmedicine.org/>, Annals of Internal Medicine at <http://www.annals.org/>, and Epidemiology at <http://www.epidem.com/>). Information on the STROBE Initiative is available at [www.strobe-statement.org](http://www.strobe-statement.org).

# BMJ Open

## Development and piloting of a survey to estimate the frequency and nature of potentially-harmful preventable problems in primary care from a UK patient's perspective

|                                 |                                                                                                                                                                                                                                                                                                                                                                                                                                                                                                                                                                                                                                                                                                                                                                                                                                                                                                                                                                                           |
|---------------------------------|-------------------------------------------------------------------------------------------------------------------------------------------------------------------------------------------------------------------------------------------------------------------------------------------------------------------------------------------------------------------------------------------------------------------------------------------------------------------------------------------------------------------------------------------------------------------------------------------------------------------------------------------------------------------------------------------------------------------------------------------------------------------------------------------------------------------------------------------------------------------------------------------------------------------------------------------------------------------------------------------|
| Journal:                        | <i>BMJ Open</i>                                                                                                                                                                                                                                                                                                                                                                                                                                                                                                                                                                                                                                                                                                                                                                                                                                                                                                                                                                           |
| Manuscript ID                   | bmjopen-2017-017786.R2                                                                                                                                                                                                                                                                                                                                                                                                                                                                                                                                                                                                                                                                                                                                                                                                                                                                                                                                                                    |
| Article Type:                   | Research                                                                                                                                                                                                                                                                                                                                                                                                                                                                                                                                                                                                                                                                                                                                                                                                                                                                                                                                                                                  |
| Date Submitted by the Author:   | 02-Oct-2017                                                                                                                                                                                                                                                                                                                                                                                                                                                                                                                                                                                                                                                                                                                                                                                                                                                                                                                                                                               |
| Complete List of Authors:       | Stocks, Susan; University of Manchester, GM Patient Safety Translational Research Centre<br>Donnelly, Ailsa; University of Manchester, PRIMER<br>Esmail, Aneez; University of Manchester, School of Primary Care<br>Beresford, Joanne; Research User Group (RUG) of the NIHR Greater Manchester Primary Care Patient Safety Translational Research Centre<br>Gamble, Carolyn; University of Manchester, GM Patient Safety Translational Research Centre<br>Luty, Sarah; NHS Scotland<br>Deacon, Richard; St Gabriels Medical Centre<br>Danczak, Avril; Central and South Manchester Specialty Training Programme for General Practice<br>Mann, Nicola; University of Manchester, GMPSTRC<br>Townsend, David; University of Manchester, GM Patient Safety Translational Research Centre<br>Ashley, James; Division of Dentistry, School of Medical Sciences, University of Manchester<br>Bowie, Paul; NHS Scotland<br>Campbell, Stephen; University of Manchester, Centre for Primary Care |
| <b>Primary Subject Heading</b>: | Research methods                                                                                                                                                                                                                                                                                                                                                                                                                                                                                                                                                                                                                                                                                                                                                                                                                                                                                                                                                                          |
| Secondary Subject Heading:      | General practice / Family practice, Health services research, Communication, Patient-centred medicine, Research methods                                                                                                                                                                                                                                                                                                                                                                                                                                                                                                                                                                                                                                                                                                                                                                                                                                                                   |
| Keywords:                       | STATISTICS & RESEARCH METHODS, PRIMARY CARE, Quality in health care < HEALTH SERVICES ADMINISTRATION & MANAGEMENT                                                                                                                                                                                                                                                                                                                                                                                                                                                                                                                                                                                                                                                                                                                                                                                                                                                                         |
|                                 |                                                                                                                                                                                                                                                                                                                                                                                                                                                                                                                                                                                                                                                                                                                                                                                                                                                                                                                                                                                           |

SCHOLARONE™  
Manuscripts



1  
2  
3  
4  
5  
6  
7  
8  
9  
10  
11  
12  
13  
14  
15  
16  
17  
18  
19  
20  
21  
22  
23  
24  
25  
26  
27  
28  
29  
30  
31  
32  
33  
34  
35  
36  
37  
38  
39  
40  
41  
42  
43  
44  
45  
46  
47  
48  
49  
50  
51  
52  
53  
54  
55  
56  
57  
58  
59  
60

1 Development and piloting of a survey to estimate the frequency and nature of potentially-harmful  
2 preventable-problems in primary care from a UK patient's perspective

3

4 S Jill Stocks *research fellow*<sup>1</sup>, Ailsa Donnelly *public and patient involvement volunteer*<sup>2</sup>, Aneez Esmail  
5 *professor*<sup>1</sup>, Joanne Beresford *public and patient involvement volunteer*<sup>2</sup> Carolyn Gamble *public and*  
6 *patient involvement volunteer*<sup>2</sup>, Sarah Luty *general practitioner*<sup>3</sup>, Richard Deacon *general*  
7 *practitioner*<sup>4</sup>, Avril Danczak *general practitioner*<sup>5</sup>, Nicola Mann *general practitioner*<sup>2</sup>, David Townsend  
8 *general practitioner*<sup>2</sup>, James Ashley *general dental practitioner*<sup>6</sup>, Paul Bowie *programme director*<sup>7,8</sup>,  
9 Stephen M Campbell *professor*<sup>1</sup>

10

11 1. NIHR Greater Manchester Primary Care Patient Safety Translational Research Centre, Centre for  
12 Primary Care, Division of Population Health, Health Services Research and Primary Care, University  
13 of Manchester, Manchester M13 9PL, UK

14 2. Research User Group (RUG) of the NIHR Greater Manchester Primary Care Patient Safety  
15 Translational Research Centre, Centre for Primary Care, Division of Population Health, Health  
16 Services Research and Primary Care, University of Manchester, Manchester M13 9PL, UK

17 3. General Practitioner NHS Greater Glasgow and Clyde, Medical Directorate, NHS Education for  
18 Scotland, Glasgow G3 8BW

19 4. St Gabriels Medical Centre, 4, Bishops Road, Prestwich, Manchester M25 0HT, UK

20 5. Central and South Manchester Specialty Training Programme for General Practice, Health  
21 Education England North West ( HEENWE) Education and Research Centre, Wythenshawe Hospital,  
22 Manchester M23 9LT, UK

23 6. Woodlands Dental Practice, Rock Ferry, Wirral, CH42 4NG, UK

24 7. Medical Directorate, NHS Education for Scotland, 2 Central Quay, Glasgow G3 8BW, UK.

25 8. Institute of Health and Wellbeing, University of Glasgow, Glasgow G12 0XH, UK

26

27

28

29 Correspondence to [jill.stocks@manchester.ac.uk](mailto:jill.stocks@manchester.ac.uk)

30

31 Word count: 3856

32

1  
2  
3 **1 ABSTRACT**

4  
5 **2 Objectives:** To design and pilot a survey to be used at the population level to estimate the frequency  
6  
7 of patient-perceived potentially-harmful preventable-problems occurring in UK primary care. To  
8  
9 explore the nature of the problems, patient-suggested strategies for prevention and opinions of  
10  
11 clinicians and the public regarding the potential for harm

12  
13 **6 Design:** a survey was co-designed by three members of the public and one researcher and piloted  
14  
15 through public and patient involvement and engagement networks

16  
17 **8 Setting:** self-selected sample of the UK population

18  
19 **9 Participants:** 977 members of the public accessed the online survey during October and November  
20  
21 2015

22  
23 **11 Primary outcome measures:** respondent feedback about the ease of completion of the survey,  
24  
25 quality of responses in terms of review by clinicians and members of the public, preliminary  
26  
27 estimates of the frequency and nature of patient-perceived potentially-harmful problems occurring  
28  
29 in the last 12 months

30  
31 **15 Results:** 638 (65%) members of the public completed the survey and few respondents reported any  
32  
33 difficulty in understanding or completing the survey. 132 (21%) respondents reported experiencing a  
34  
35 potentially-harmful preventable-problem during the past 12 months and 108 (82%) of these  
36  
37 respondents provided a description that was adequate for at least one clinician to form an opinion  
38  
39 about the potentially-harmful problem. Respondents were older than the UK generally, more likely  
40  
41 to work or volunteer in the healthcare sector and tended to use primary care more frequently but  
42  
43 their confidence and trust in their own GP was similar to that of the UK population as measured by  
44  
45 the annual English GP patient survey.

46  
47 **23 Conclusions:** the survey was acceptable to patients and mostly provided data of sufficient quality for  
48  
49 review by clinicians and members of the public. It is now ready to use at a population level to  
50  
51 estimate the frequency and nature of potentially-harmful preventable-problems in primary care  
52  
53 from a patient's perspective.

54  
55 **28 Strengths and limitations of this study**

- 56  
57  
58  
59  
60
- We have designed and tested a survey to measure the frequency and nature of potentially-harmful preventable-problems in primary care from the patient's perspective
  - The survey was co-designed by three members of the public and piloted through extensive public and patient involvement
  - The patient-described scenarios were reviewed by primary care clinicians
  - The study respondents were self-selected through public and patient involvement and engagement groups
  - The survey is ready to be administered to a representative sample of the general population

## 1 BACKGROUND

2  
3 Patients are thought to take a different view of patient safety to healthcare professionals. (1) They  
4 tend to view safety in terms of the overall balance of benefit and harm over time whereas  
5 healthcare professionals often see high quality healthcare occasionally punctuated by safety  
6 incidents and adverse events.(2) Furthermore patients hold may different opinions about how to  
7 improve patient safety (3, 4) or different priorities to clinicians, for example identifying psychological  
8 and emotional harm rather than technical errors.(5) Involving patients in identifying errors and  
9 reducing harm occurs in secondary care (6) but patient reported outcomes can show poor  
10 concordance between patients and clinicians, for example, in reporting adverse symptom events in  
11 the context of drug safety.(7) Nonetheless patients are thought to be capable of reporting medical  
12 errors accurately. (6, 8) Involving patients is advocated as a way to improve safety (9) and this  
13 approach would be facilitated through patients and professionals having an understanding each  
14 other's expectations and priorities.

15  
16 Studies that quantify patient safety problems in primary care are uncommon and incidence  
17 estimates from record review or incident reporting by clinicians range from less than 1 to 24 per 100  
18 consultations or record review.(10-12) The National Reporting and Learning System (NRLS) in  
19 England and Wales records patient safety incidents reported by healthcare professionals; only 1% of  
20 these reports originate from primary care (13) which likely reflects under-reporting.(14, 15) Still  
21 fewer studies have quantified patient safety problems in primary care from the patient's  
22 perspective. (16) A 2013 European survey of the UK public reported that 43% of respondents felt  
23 that it was "likely" that patients could be harmed by non-hospital healthcare, an increase from 37%  
24 in 2009.(17) In Norway a population-level survey found that the patient-reported lifetime probability  
25 of ever experiencing an adverse event was 10%, of which around two thirds of respondents  
26 attributed the cause of their event as their general practitioner (GP).(4) In Spain a telephone survey  
27 of patients estimated that around 7% of patients experienced a self-reported adverse event during a  
28 1 year period. (18) A USA practice-based website observed an incidence rate of patient-reported  
29 adverse events of 1.4% over 2 years.(19) Data from the UK is sparse; this may be partly due to the  
30 lack of a valid and reliable instrument to make a comprehensive measurement of safety in primary  
31 care.(20) The PREOS-PC should help to address this knowledge gap.(21, 22)

32  
33 Although it is acknowledged that patients tend to take a different view to professionals (1-2) most  
34 research into patient safety is initiated by clinicians with patients invited to contribute. We choose to  
35 take an alternative approach whereby the study design was conceived, designed and implemented  
36 by a team of three members of the public and one researcher with primary care professionals being  
37 invited to contribute later. Previous work has shown that patient-initiated surveys can provide  
38 meaningful feedback and guide improvements. (23) Our aim was to design a survey asking about  
39 potentially-harmful preventable-problems occurring in UK primary care in partnership with the  
40 Greater Manchester Primary Care Patient Safety Translational Research Centre Research User  
41 Group, (GMPSTRC RUG) a public and patient involvement (PPI) group.(24) Specifically we aimed to:

42  
43 1. co-design (with PPI partners) and test a survey asking about problems occurring in primary care  
44 that caused, or had the potential to cause, preventable harm as perceived by patients

- 1 2. pilot the survey to examine the usefulness and overall quality of the information collected with
- 2 respect to describing the patient-perceived problems, the primary care service involved, how the
- 3 problem was discussed (if it was) and how it might have been prevented.
- 4 3. compare the opinions of the survey respondents, members of the public and primary care
- 5 clinicians as to the likelihood the patient-reported scenario describes a potentially-harmful
- 6 preventable-problem.

## 7 8 **METHODS**

### 9 10 **Designing and piloting of the survey (Aim 1)**

11  
12 Our main aim was to design a survey asking about problems occurring in primary care that caused,  
13 or had the potential to cause, preventable harm as perceived by patients that was easily understood  
14 and free from jargon. Currently there is no well-established terminology for asking such a  
15 question.<sup>(8)</sup> The process began with a discussion between three members of the GMPSTRC RUG  
16 (AD, JB, CG) and one academic researcher (SJS). Questions used in previous surveys addressing a  
17 similar question (4, 17-19) were shared among the project team and used to generate several  
18 candidate questions. These questions were then discussed privately among the project team's  
19 friends and family and within the project team (SJS, AD, JB, CG). The discussion was facilitated by  
20 making the candidate questions available online. After two iterations of this process the survey (Box  
21 1 & Box A in online Appendix 1) was piloted online through newsletters or group mailings of several  
22 PPI and public engagement networks during November and December 2015. These networks were  
23 the associate GMPSTRC RUG, the Public Programmes team at Central Manchester Foundation Trust,  
24 the Citizen Scientist project, the Primary Care Research in Manchester Engagement Resource, North  
25 West People in Research Forum and HelpBeatDiabetes volunteers (Details of these groups and  
26 networks are provided in Box B in online Appendix 1).

27  
28 The first question (Q1 Box 1) was taken from the English GP patient survey in order to compare the  
29 overall level of confidence and trust in their GP among the survey respondents with that across  
30 England.<sup>(25)</sup> The second question (Q2 Box 1) is the main screening question, those responding  
31 negatively to Q2 (*i.e.* not experienced a preventable-problem) were directed to a more specific  
32 question with a list of commonly understood patient safety events (Q10 Box A, online Appendix 1). If  
33 this prompted recognition of experiencing a potentially-harmful preventable-problem they were  
34 returned to Q4 (Box1). The rationale behind this approach was that the screening question (Q2 Box  
35 1) should be non-leading and encourage the respondents to describe their preventable-problems  
36 through the subsequent questions without the suggestion that inevitably occurs following a list of  
37 possible potentially-harmful preventable-problems. However if the respondent did not believe that  
38 they had experienced a potentially-harmful preventable-problem then the prompt question (Q10,  
39 Box 1) would ensure that this was the case and also test the sensitivity of Q2 (Box 1). The option to  
40 answer on behalf of a friend or relative was offered to those who had not a personal experience to  
41 report. This was to ensure sufficient responses to adequately test the questionnaire but also to  
42 discourage respondents from answering with another person's experience as their own.  
43 Respondents were also asked whether they worked or volunteered in the healthcare profession and  
44 to comment on the ease of completion of the questionnaire.

## 1           2           3           4           5           6           7           8           9           10           11           12           13           14           15           16           17           18           19           20           21           22           23           24           25           26           27           28           29           30           31           32           33           34           35           36           37           38           39           40           41           42           43           44           45           46           47           48           49           50           51           52           53           54           55           56           57           58           59           60

### 1    **Coding of reported events (Aims 2&3)**

#### 2    Type of problem (Aim 2)

3  
4    The nature of the problem in each described scenario was coded at face value, *i.e.* as the patient  
5    described without further interpretation, by one author (SJS) and checked by a second author (JA for  
6    dental scenarios, PB for all other scenarios). A bottom-up (inductive) approach was used to identify  
7    similar topics which were coded then cross-matched to an existing taxonomy for errors in general  
8    practice (26, 27) (Table A, online Appendix 1). All the new codes matched the existing taxonomy  
9    within the higher two levels and the medication-related scenarios were coded to a finer level (Table  
10   B, online Appendix 1).

#### 11   Likelihood the scenario described a potentially-harmful preventable-problem (Aim 3)

12  
13  
14   Five GPs, one general dental practitioner and seven members of the public estimated the likelihood  
15   that, in their opinion, each patient-described scenario was a potentially-harmful preventable-  
16   problem. Brief biographies of the coders are provided in Table C, online Appendix 1. Some examples  
17   of the information provided to the coders are shown in boxes 1-23 in online Appendix 2 and  
18   consisted of the responses to Q5 to Q9 (Box 1). They were not given any demographic information or  
19   the patient's estimate of the impact on their health (Q4, Box 1). Coders were asked to score each  
20   scenario from very likely (5) to definitely not (1) in response to the question "*How likely do you think*  
21   *it is the patient was correct in thinking that their health might be worsened, or actually was made*  
22   *worse, because of a mistake or a problem in primary care that could have been prevented?*" Coders  
23   could also respond "insufficient information", "Don't know" and give free text feedback (Table D,  
24   Appendix 1). The clinician scores were used to categorise the scenarios in to groups with higher or  
25   lower estimated likelihoods that they were a potentially-harmful preventable-problem as below.

- 26       • Higher threshold - Median score of 5 ("very likely or certain") or 4 ("probably") or at least  
27       one score of 5 ("very likely or certain")
- 28       • Lower threshold - Median score of 3 ("possibly") or at least one score of 4 ("probably" or  
29       higher)
- 30       • All other scenarios – Median score below 3 ("possibly") and zero scores above 3 ("possibly")

#### 31    **Statistical analysis**

32    Simple cross tabulations were used to describe the data and a binary logistic regression model was  
33    used to explore whether particular types of patient were more likely to perceive a potentially-  
34    harmful preventable-problems *e.g.* by demographics or their opinions. Comparisons between  
35    demographics and outcomes for the respondents and the UK (or England) population were made  
36    using a  $\chi^2$  test. All analyses were done using Stata 14.

#### 37    **Public and Patient Involvement (PPI)**

38  
39    PPI was central to this co-design study and was provided through the GMPSTRC RUG (24) and other  
40    PPI networks (Box B, online Appendix 1). The study was conceived, designed, implemented and  
41    analysed by a team of three members of the public (AD, CG, JB) and one researcher (SJS). At the  
42    outset the researcher presented the existing literature on this topic to the PPI members of the  
43

1 research team who then co-designed the first draft of the survey which was tested through the PPI  
2 members' personal contacts. The piloting of the survey was through existing PPI networks as listed in  
3 Box B, online Appendix 1. The scoring of the questions as to the likelihood they described a  
4 potentially-harmful preventable-problem was undertaken by 7 members of the public, 2 of whom  
5 had no previous experience in PPI (as well as 5 GPs and 1 general dental practitioner as described in  
6 Table C, online Appendix 1). These findings will be disseminated to all the PPI groups that  
7 contributed to the pilot study and the authors will forward these results to their personal contacts  
8 who contributed to the questionnaire design.

9  
10 Ethical approval was granted by the University of Manchester Ethics Committee 2 (Approval 15372).

## 11 **RESULTS**

### 12 **The survey design (Aim 1)**

13 The involvement of the PPI partners in the survey design had a profound impact on the piloted  
14 version of the survey. Professional researchers may have focussed more on asking questions in a  
15 way that forces the responses in to categories but the PPI partners were more concerned that  
16 respondents should have the freedom to express themselves and the categorisation should occur  
17 during the analysis. They themselves had often completed surveys where there was no appropriate  
18 option in the categorical responses. We did not find any of the previous approaches (4, 17-19)  
19 suitable for this survey and chose to design a new question. The best option was felt to be an open  
20 question with a prompt question for individuals who did not recognise the concept of a preventable  
21 potentially-harmful event. Another point of debate was whether we should ask initially about a  
22 "problem" then ask if it was "preventable" in a second question. The difficulty with simply asking  
23 about a "problem" is that most patients visit their GP because they have a health problem therefore  
24 we thought it was more practical to focus immediately on the concept of a preventable-problem  
25 encapsulated in a single phrase with a back-up question to ensure it was indeed preventable.

### 26 **Ease of use of the survey (Aim 1)**

27 Over 250 respondents provided free text feedback on the survey, 200 comments reported that the  
28 questionnaire was easy to complete and understand and just one comment described the survey as  
29 complex. Most of the remaining comments expressed the desire to be able to provide more  
30 information, *e.g.* more than one event or report for a relative or as a carer (reporting on behalf of  
31 another person was excluded for events occurring more than 12 months ago) and 13 comments  
32 actually provided this unrequested information. Nobody used the "Do not understand the question"  
33 option as their response to Q2 Box1. A few respondents found it difficult to find a suitable option to  
34 describe their pattern of use of primary care or their role as a worker or volunteer in healthcare.  
35 Demographic information was not provided by 83 (13%) respondents, possibly due to lack of clarity  
36 about the end of the survey since they completed all other questions.

### 37 **Summary statistics (Aim 2)**

38 In total 977 members of the public accessed the online pilot survey and 638 (65%) completed the  
39 survey during October and November 2015. The majority of respondents were recruited through the  
40 HelpBeatDiabetes group (533, 84%, Box B in online Appendix 1). A flow chart of respondents

1 through the survey is shown in Fig A in online Appendix 1, 223/638 (35%) of respondents reported  
2 ever experiencing a potentially-harmful preventable-problem in primary care of which 132 occurred  
3 within the past 12 months (21%). 62 (10%) of these problems were not identified through the initial  
4 screening question (Q2) but required prompting through Q10 (Box 1). A further 18 potentially-  
5 harmful preventable-problems involving friends or relatives where the respondent was present and  
6 occurred in the last 12 months were reported 13/418 (3%, Fig B, online Appendix 1).

### 7 **Characteristics of the respondents (Aim 2)**

8 The majority of respondents (592, 93%) had confidence and trust in the GP seen at their last  
9 appointment similar to the 2016 England proportion of 92% (Q1, Box1 & Table 1). Respondents were  
10 older than the UK generally, more likely to work or volunteer in the healthcare sector and tended to  
11 use primary care more frequently (Table 1). Older respondents and those working or volunteering in  
12 the healthcare sector were no more likely to report a potentially-harmful preventable-problem  
13 occurring within the last 12 months but those using primary care more frequently were more likely  
14 to report a problem (Table 2). There was a high response from healthcare professionals or  
15 volunteers (30% of respondents compared to approximately 3% of the UK adult population, Table 1)  
16 but they were no more likely to report a preventable problem than non-healthcare  
17 workers/volunteers (35%,  $P\chi^2=0.28$ ).

### 18 **The nature of the potentially-harmful preventable-problems (Aim 2)**

19 The types of patient-reported scenarios and their categorisation following clinician review are shown  
20 in Figure 1. Medication-related problems were most frequently reported type of problem and also  
21 more likely to be ranked as a potentially-harmful problem by clinicians, as were communication  
22 problems. The type of scenario categorised according to whether it arose from the open-ended  
23 screening question (Q2) or prompted through the list of potential problems (Q10) is shown in  
24 Figures C&D, online Appendix 1. Scenarios describing problems with appointments, accessing  
25 healthcare or loss of test results were more likely to arrive via the prompt question suggesting that  
26 patients did not see these as a potentially harmful problem in the first instance. The majority of  
27 potentially-harmful preventable-problems in the past 12 months occurred in general practice (73%,  
28 Table 3) and pharmacy (5%, Table 3).

### 29 **The patient's response to the potentially-harmful preventable-problem (Aim 2)**

30 Around half the respondents had not discussed their problem with anybody working in primary care  
31 (51%, Table 3). The most common reasons for not discussing the problem were being unable to find  
32 a primary care professional with whom to discuss the problem (31%, Table 3) or they did not feel  
33 comfortable with discussing their concerns (24%, Table 3). The respondent's suggestions for ways to  
34 prevent the problem from happening are summarised in Table 4. The most frequently suggestions  
35 were that clinicians should involve the patient more fully in the healthcare process (*i.e.* listen to the  
36 patient and trust their judgement more) and be up to date with, and apply, the most recent  
37 information about the patient's condition (*i.e.* take in to account all of the patient's information -  
38 their medical history and results and letters).

### 39 **Likelihood the patient-reported scenario described a potentially-harmful preventable-problem** 40 **(Aim 3)**

1  
2  
3 1 Generally the members of the public assigned a higher probability to the likelihood that the patient-  
4 2 described scenario was a potentially-harmful preventable-problem compared with clinicians (Fig 2,  
5 3 Table 5). In 89/108 (82%) scenarios the median score for the PPI researchers was higher than for the  
6 4 clinicians and for 38 (35%) scenarios the PPI median score was 2 or more points higher in a 5 point  
7 5 scale. Following clinician review 3% of the respondents were judged to have “probably” experienced  
8 6 potentially-unsafe preventable-problem during the past 12 months and 11% as “possibly” (using  
9 7 higher and lower thresholds described in Table 5). Scenarios described by healthcare professionals  
10 8 or volunteers were significantly more likely to be categorised as a potentially-harmful preventable-  
11 9 problem following to clinician review using both the lower (9% vs 16%,  $P\chi^2=0.01$ ) and higher  
12 10 threshold (2% vs 6%,  $P\chi^2=0.004$ ). Examples of the patient-reported scenarios with higher clinician  
13 11 rankings are shown in boxes 1-15, online Appendix 2 and those with greatest disagreement between  
14 12 members of the public and clinicians in boxes 16 to 23, online Appendix 2.

### 13 **DISCUSSION**

14 We have designed and tested a survey to measure the frequency of occurrence of potentially-  
15 15 harmful preventable-problems in primary care and found it to be well understood and acceptable to  
16 16 patients. The open-ended questions (Q6 to Q9, Box 1) led to patient-described scenarios that  
17 17 mapped well to an existing taxonomy designed and used by clinicians and researchers (Tables A&B,  
18 18 online Appendix 1, 26, 27). This implies agreement between clinicians, researchers and patients in  
19 19 identifying the characteristics of a potentially-harmful problem. Furthermore, the use of an open-  
20 20 ended screening question (Q2, Box 1) to ensure that any problems unique to the patient perspective  
21 21 were identified did not find additional new types of problem. However, the open-ended question  
22 22 elicited more problems related to communication and medication suggesting that the public are  
23 23 more likely to view these as safety problems than problems related to appointments and referrals or  
24 24 investigations (Fig C&D online Appendix 1) in agreement with clinicians who were more likely to rank  
25 25 these types of scenarios as potentially harmful. The observation that members of the public were  
26 26 generally more likely to rank the scenarios as a potentially-harmful preventable-problem than  
27 27 clinicians (Fig 2) is important. It is important that primary care not only is safe but that it is perceived  
28 28 as safe by patients.

#### 30 **Strengths and weaknesses of the study**

31  
32 We believe that our survey captures the true patient perspective due to the involvement of  
33 33 members of the public as research partners through data acquisition to analysis and reporting in a  
34 34 co-designed study. By the use of a simple non-leading screening question we encouraged  
35 35 respondents to express their own perspective on what constituted a potentially-harmful  
36 36 preventable-problem rather than directing them towards existing definitions. To ensure that we did  
37 37 not miss any problems we followed up with a prompt that encouraged respondents to think in terms  
38 38 of the traditional view of patient safety problems. Furthermore our survey goes further than  
39 39 describing and counting the frequency of occurrence of potentially-harmful preventable-problems  
40 40 and provides information about how patients dealt with the problem and how it could have been  
41 41 prevented that offers insight in to ways to reduce the frequency of their occurrence. The absence of  
42 42 a link between practices and the patients allows for responses that might not occur if this survey  
43 43 were administered through the individual’s practice. The main weakness of the study is the self-  
44 44 selection of the respondents who were older and tended to use primary care more frequently. More



1  
2  
3 1 frequent users of primary care were more likely to report a problem but age was not associated with  
4 2 the likelihood of reporting a problem. Our bench marking question (Q1, Box1) showed that the  
5 3 respondents were similar to the English GP patient survey (25) in terms of their level of confidence  
6 4 and trust in their GP and not a group with a more negative attitude towards primary care as might  
7 5 have happened given the nature of the survey. We also acknowledge that, by design, this study is  
8 6 totally from the patient perspective. We aim to provide insight into the patient's perspective and not  
9 7 to imply that one or the other point of view is more important but rather there are differences in  
10 8 perceptions that need to be understood and reconciled.  
11 9

### 10 **Strengths and weaknesses in relation to other studies**

11  
12 Our finding that 35% of respondents perceived that they had experienced a potentially-harmful  
13 13 problem in in their lifetime is consistent with a European survey (43% of UK respondents felt that it  
14 14 was "likely" that patients could be harmed by non-hospital healthcare).(17) This study offers some  
15 15 insight in to the type of concerns that might underlie this apparent lack of confidence in primary  
16 16 care. A face to face interview in family practice waiting rooms in the USA reported that 16% of  
17 17 respondents believed a physician had made a mistake in their care.(28) The types of problem and  
18 18 patient responses to the problem are similar to those that have been described qualitatively (1, 22)  
19 19 but we have taken this a step further by quantifying their frequency of occurrence and other  
20 20 descriptors of the problem from the patient's perspective. In this small study we did not find that  
21 21 patients were particularly likely to attribute blame to individual members of staff as has been  
22 22 observed previously (3, 4), perhaps partly due to the high proportion of respondents working or  
23 23 volunteering in healthcare.  
24 24

### 25 **Unanswered questions and future research**

26  
27 Our finding that 21% of respondents perceived that they had experienced a potentially-harmful  
28 28 problem in the last 12 months, and the corresponding proportion following clinician review of 3%  
29 29 (higher threshold) to 11% (lower threshold) may well reflect the self-selected nature of the study  
30 30 population and needs to be validated in a large population level survey. We anticipate that a  
31 31 population level survey would be fruitful since this approach yielded a number of patient-described  
32 32 scenarios that were amenable to further analysis including coding by clinicians. The high response to  
33 33 this pilot survey by healthcare professionals and volunteers probably reflects the population invited  
34 34 to complete the survey as well as an interest in this topic. It is likely that these respondents are  
35 35 better at articulating their potentially-harmful problem given the higher ranking given by clinicians  
36 36 to scenarios originating from healthcare professionals. Healthcare professionals are an educated and  
37 37 accessible group with the expectations of a patient but also an understanding of the healthcare  
38 38 system who could provide a valuable resource for learning about preventable-problems in primary  
39 39 care. Further work is also needed to understand and reconcile the differences between members of  
40 40 the public and clinicians' perceptions of a potentially-harmful problem. In 1997 Professor Berwick  
41 41 stated "The ultimate measure by which to judge the quality of a medical effort is whether it helps  
42 42 patients (and their families) as they see it. Anything done in health care that does not help a patient  
43 43 or family is, by definition, waste, whether or not the professions and their associations traditionally  
44 44 hallow it." If this tenet still holds then we suggest there is a real need to influence patient's  
45 45 expectations and beliefs about primary care.

1  
2  
3  
4 1  
5 2 Acknowledgements: The authors would like to express their thanks and appreciation for the work  
6 3 done by the Mary Aldred, Gitanjali Holt, Manoj Mistry, Carole Bennett and Lindsey Brown in coding  
7 4 the patient-described scenarios.  
8 5

9 6 This work was supported by the NIHR grant number gmpstrc-2012-1  
10 7

11 8 Funding: This study was funded by the National Institute for Health Research  
12 9 (<http://www.nihr.ac.uk>) through the Greater Manchester Primary Care Patient Safety Translational  
13 10 Research Centre (NIHR GM PSTRC), grant number gmpstrc-2012-1. The views expressed are those of  
14 11 the author(s) and not necessarily those of the NHS, the NIHR or the Department of Health. The  
15 12 funders had no role in study design, data collection and analysis, decision to publish, or preparation  
16 13 of the manuscript.  
17 14

18 15 Competing interests: All authors have completed the ICMJE uniform disclosure form at  
19 16 [www.icmje.org/coi\\_disclosure.pdf](http://www.icmje.org/coi_disclosure.pdf) (available on request from the corresponding author) and declare  
20 17 no support from any organisation for the submitted work; no financial relationships with any  
21 18 organisations that might have an interest in the submitted work in the previous three years, no  
22 19 other relationships or activities that could appear to have influenced the submitted work.  
23 20

24 21 Copyright statement: the Corresponding Author has the right to grant on behalf of all authors and  
25 22 does grant on behalf of all authors, an exclusive licence on a worldwide basis to the BMJ Publishing  
26 23 Group Ltd to permit this article (if accepted) to be published in BMJ editions and any other BMJ PGL  
27 24 products and sublicences such use and exploit all subsidiary rights, as set out in our licence.  
28 25

29 26 Contributors: SJS, AD, JB and CG conceived and designed the study. SJS, AD, JB, CG, AE, PB, JA, DT,  
30 27 SL, AD, RD and NM analysed the data. SJS wrote the manuscript, and is guarantor. AD, JB, CG, AE, PB,  
31 28 JA, DT, SL, AD, RD, NM and SC edited the manuscript.  
32 29

33 30 Data sharing: Raw data (coded only) is available from [jill.stocks@manchester.ac.uk](mailto:jill.stocks@manchester.ac.uk)  
34 31

35 32 Ethics approval: University of Manchester Ethics Committee 2 (Approval 15372)  
36 33

37 34 Figure legends  
38 35

39 36 Fig 1. Numbers of patient-perceived problems occurring in the last 12 months categorised according  
40 37 to the patient's description with clinician ranking as to the likelihood it is a potentially-harmful  
41 38 preventable problem (Table 5).  
42 39

43 40 Footnote to Figure 1: See Tables A&B, online Appendix 1 for details of coding; A coded to 2 levels, B  
44 41 medication problems coded to 3 levels, C coded to 1 level  
45 42

46 43 Figure 2. Median estimates as to the likelihood that the patient describes a potentially-harmful  
47 44 preventable-problem occurring in the last 12 months by six clinicians and seven members of the  
48 45 public  
49 46

50 47  
51 48  
52 49  
53 50  
54 51  
55 52  
56 53  
57 54  
58 55  
59 56  
60 57

1

Box 1. Brief summary of questionnaire – see Box A, online Appendix 1 for full version of survey.

Q1. Did you have confidence and trust in the GP you saw or spoke to at your last appointment?  
(benchmarking question)

Q2. When using primary care have you ever felt concerned that your health might be worsened, or actually was made worse, because of a mistake or a problem that could have been prevented?

If yes to Q2

Q3. How long ago did the mistake or preventable problem happen?

Q4. How did this affect your health?

Q5. Which primary care service were you using when the mistake or preventable problem occurred?

Q6. Briefly describe the mistake or problem and how it happened

Q7. Could the mistake or problem have been avoided? If so how?

Q8. Were you able to talk about the mistake or problem with anybody working in the primary care service? If not –why not?

Q9. If you discussed the mistake or problem with somebody working in primary care please describe their job or role

Q10. In the list below are some examples of **preventable** problems<sup>1</sup> that might happen when using primary care. Has ***anything similar*** happened to you ***in the last 12 months***? If yes go to Q4

<sup>1</sup>See Q10 Box A, online Appendix 1 for list of preventable problems

2

3

1 Table 1. Characteristics of survey respondents

| Variable                               | All respondents<br>n=638 | Ever had problem<br>n=223 | Had problem<br>in last 12<br>months<br>n=132 | UK population<br>comparator            |
|----------------------------------------|--------------------------|---------------------------|----------------------------------------------|----------------------------------------|
| GP satisfaction                        | missing=0                | missing=0                 | missing=0                                    | English GP patient survey(25)          |
| Yes definitely                         | 384 (60%)                | 81 (36%)                  | 55 (42%)                                     | 64%                                    |
| Yes, to some extent                    | 208 (33%)                | 110 (49%)                 | 52 (39%)                                     | 28%                                    |
| No, not at all                         | 39 (6%)                  | 27 (12%)                  | 21 (16%)                                     | 4%                                     |
| Don't know / can't say                 | 7 (1%)                   | 5 (2%)                    | 4 (3%)                                       | 3%                                     |
| Worked or volunteered in<br>healthcare | missing=92               | missing=40                | missing=19                                   | NHS workforce <sup>1</sup>             |
| Yes                                    | 166 (30%)                | 64 (35%)                  | 41 (36%)                                     | 3%                                     |
| Gender                                 | missing=87               | missing=38                | missing=16                                   | ONS mid-2015<br>estimates <sup>2</sup> |
| Female                                 | 268 (49%)                | 106 (57%)                 | 63 (54%)                                     | 51%                                    |
| Age                                    | missing=85               | missing=37                | missing=15                                   | ONS mid-2015<br>estimates <sup>2</sup> |
| 16 to 34 years                         | 42 (8%)                  | 22 (12%)                  | 11 (9%)                                      | 31%                                    |
| 35 to 54 years                         | 143 (26%)                | 54 (29%)                  | 34 (29%)                                     | 34%                                    |
| 55 to 64 years                         | 162 (29%)                | 59 (32%)                  | 31 (27%)                                     | 14%                                    |
| 65 to 74 years                         | 170 (31%)                | 44 (24%)                  | 32 (27%)                                     | 12%                                    |
| Over 75 years                          | 36 (7%)                  | 7 (4%)                    | 9 (8%)                                       | 9%                                     |
| Last primary care contact              | missing=88               | missing=39                | missing=14                                   | English GP patient<br>survey(25)       |
| Within last week                       | 169 (31%)                | 65 (35%)                  | 48 (41%)                                     | 84% within last<br>12 months           |
| Within last month                      | 248 (45%)                | 79 (43%)                  | 47 (40%)                                     |                                        |
| Within last 12 months                  | 121 (22%)                | 34 (18%)                  | 20 (17%)                                     |                                        |
| Over 12 months ago                     | 12 (2%)                  | 6 (3%)                    | 3 (3%)                                       |                                        |
| Usual primary care usage               | missing=88               | missing=40                | missing=17                                   |                                        |
| At least once a month                  | 181 (33%)                | 73 (40%)                  | 52 (45%)                                     | -                                      |
| At least once per 6 months             | 285 (52%)                | 79 (43%)                  | 45 (39%)                                     | -                                      |
| Once per 12 months or less             | 84 (15%)                 | 31 (17%)                  | 18 (16%)                                     | -                                      |

<sup>1</sup><http://content.digital.nhs.uk/searchcatalogue?productid=24139&topics=1%2fWorkforce%2fStaff+numbers&sort=Relevance&size=10&page=1#top>

<sup>2</sup><https://www.ons.gov.uk/peoplepopulationandcommunity/populationandmigration/populationestimates/bulletins/annualmidyearpopulationestimates/latest>

1 Table 2. Prevalence of respondents reporting a potentially-harmful preventable problem within the  
 2 last 12 months and unadjusted and adjusted odds ratios estimated by logistic regression

| Respondent characteristics<br>n=638                   | Frequency – all<br>reported n=132 | Unadjusted<br>odds ratio (OR)<br>– all reports | Adjusted <sup>1</sup> OR -<br>all reports | Adjusted <sup>1</sup> OR -<br>after GP review<br>(lower threshold,<br>Table 5) |
|-------------------------------------------------------|-----------------------------------|------------------------------------------------|-------------------------------------------|--------------------------------------------------------------------------------|
| <b>Gender (87 missing)</b>                            |                                   |                                                |                                           |                                                                                |
| male                                                  | 53/283 (19%)                      | 1 (ref)                                        | 1 (ref)                                   | 1 (ref)                                                                        |
| female                                                | 63/268 (24%)                      | 1.3 (0.9 to 2.0)                               | 1.4 (0.9 to 2.2)                          | 1.3 (0.7 to 2.3)                                                               |
| <b>Age (85 missing)</b>                               |                                   |                                                |                                           |                                                                                |
| 16 to 34 years                                        | 11/42 (26%)                       | 1 (ref)                                        | 1 (ref)                                   | 1 (ref)                                                                        |
| 35 to 54 years                                        | 34/143 (24%)                      | 0.9 (0.4 to 1.9)                               | 0.8 (0.3 to 1.8)                          | 0.8 (0.3 to 2.1)                                                               |
| 55 to 64 years                                        | 31/162 (19%)                      | 0.7 (0.3 to 1.5)                               | 0.7 (0.3 to 1.5)                          | 0.6 (0.2 to 1.7)                                                               |
| 65 to 74 years                                        | 32/170 (19%)                      | 0.7 (0.3 to 1.4)                               | 0.6 (0.3 to 1.4)                          | 0.4 (0.2 to 1.2)                                                               |
| Over 75 years                                         | 9/36 (25%)                        | 0.9 (0.3 to 2.6)                               | 1.1 (0.4 to 3.2)                          | 0.9 (0.2 to 3.2)                                                               |
| <b>Last primary care contact (88 missing)</b>         |                                   |                                                |                                           |                                                                                |
| Within last week                                      | 48/169 (28%)                      | 1 (ref)                                        | 1 (ref)                                   | 1 (ref)                                                                        |
| Within last month                                     | 47/248 (19%)                      | 0.6 (0.4 to 0.9)                               | 0.7 (0.4 to 1.1)                          | 0.6 (0.3 to 1.0)                                                               |
| Within last 12 months                                 | 20/121 (17%)                      | 0.5 (0.3 to 0.9)                               | 0.6 (0.3 to 1.2)                          | 0.5 (0.2 to 1.3)                                                               |
| Over 12 months ago                                    | 3/12 (25%)                        | 0.8 (0.2 to 4.0)                               | 0.9 (0.2 to 4.2)                          | 0.4 (0.0 to 3.9)                                                               |
| <b>Usual primary care usage (88 missing)</b>          |                                   |                                                |                                           |                                                                                |
| At least once a month                                 | 52/181 (29%)                      | 1 (ref)                                        | 1 (ref)                                   | 1 (ref)                                                                        |
| At least once per 6 months                            | 45/285 (16%)                      | 0.5 (0.3 to 0.7)                               | 0.6 (0.3 to 0.9)                          | 0.5 (0.3 to 0.9)                                                               |
| Once per 12 months or less                            | 18/84 (21%)                       | 0.7 (0.4 to 1.2)                               | 0.8 (0.4 to 1.6)                          | 0.7 (0.3 to 1.8)                                                               |
| <b>Works or volunteers in healthcare (92 missing)</b> |                                   |                                                |                                           |                                                                                |
| No                                                    | 72/380 (19%)                      | 1 (ref)                                        | 1 (ref)                                   | 1 (ref)                                                                        |
| Yes                                                   | 41/166 (25%)                      | 1.4 (0.9 to 2.2)                               | 1.3 (0.8 to 2.1)                          | 1.5 (0.9 to 2.7)                                                               |

3  
 4 <sup>1</sup>adjusted for gender, age, last primary care contact, usual primary care usage, works or volunteers in  
 healthcare

1 Table 3. The patient's response to their perceived potentially-harmful preventable-problem and the  
 2 primary care service involved for problems occurring in the last 12 months

| Primary care service                                        | All reported problems | Clinician ranked "possibly or higher" (Lower threshold) |
|-------------------------------------------------------------|-----------------------|---------------------------------------------------------|
| All services                                                | 132                   | 71                                                      |
| GP surgery                                                  | 97 (73%)              | 61 (86%)                                                |
| Out of hours care/A&E/ambulance                             | 4 (3%)                | 1 (1%)                                                  |
| Walk in clinic                                              | 2 (2%)                | 0                                                       |
| Dental surgery                                              | 4 (3%)                | 1 (1%)                                                  |
| Pharmacy                                                    | 7 (5%)                | 6 (8%)                                                  |
| Community or district nursing                               | 4 (3%)                | 0                                                       |
| Opticians                                                   | 2 (2%)                | 1 (1%)                                                  |
| Mental health services                                      | 1 (1%)                | 0                                                       |
| missing                                                     | 11 (8%)               | 1 (1%)                                                  |
| <b>Did you discuss the problem with primary care staff?</b> |                       |                                                         |
| All respondents                                             | 132                   | 71                                                      |
| Yes – discussed with primary care staff                     | 56 (42%)              | 42 (59%)                                                |
| No – did not discuss with primary care staff                | 67 (51%)              | 29 (41%)                                                |
| missing                                                     | 9 (7%)                | 0                                                       |
| <b>Reason not discussed with primary care staff</b>         |                       |                                                         |
| All not discussing problem                                  | 67                    | 29                                                      |
| Did not feel comfortable to discuss the problem             | 16 (24%)              | 8 (28%)                                                 |
| Could not find anybody with whom to discuss the problem     | 21 (31%)              | 10 (34%)                                                |
| Unconcerned about the problem                               | 7 (10%)               | 5 (17%)                                                 |
| Did not notice the problem at the time (or too ill)         | 11 (16%)              | 4 (14%)                                                 |
| Other                                                       | 5 (7%)                | 2 (7%)                                                  |
| missing                                                     | 7 (10%)               | 0                                                       |
| <b>Profession of discussant</b>                             |                       |                                                         |
| All discussing problem                                      | 56                    | 42                                                      |
| GP                                                          | 28 (50%)              | 19 (45%)                                                |
| Practice manager                                            | 5 (9%)                | 5 (21%)                                                 |
| Receptionist                                                | 2 (4%)                | 1 (2%)                                                  |
| Practice nurse                                              | 6 (11%)               | 5 (12%)                                                 |
| Pharmacist or dispenser                                     | 7 (13%)               | 7 (17%)                                                 |
| General dental practitioner                                 | 2 (4%)                | 1 (2%)                                                  |
| Dietician                                                   | 1 (2%)                | 1 (2%)                                                  |
| Missing                                                     | 5 (9%)                | 3 (7%)                                                  |
| <b>Role of discussant in patient's care</b>                 |                       |                                                         |
| Member of staff directly involved                           | 23 (41%)              | 16 (38%)                                                |
| Another member of staff at same institution                 | 25 (45%)              | 20 (48%)                                                |
| Above unclear                                               | 8 (14%)               | 6 (14%)                                                 |

1 Table 4. Patient suggestions as to how the potentially-harmful preventable problem might have  
2 been prevented

| How could it be prevented?                                                                                 | All reported problems<br>n=132 | Clinician ranked<br>“possibly or<br>higher” (Lower<br>threshold) n=71 |
|------------------------------------------------------------------------------------------------------------|--------------------------------|-----------------------------------------------------------------------|
| <b>1. More resources - all</b>                                                                             | <b>14 (11%)</b>                | <b>3 (4%)</b>                                                         |
| 1.1 Quicker access to primary care                                                                         | 7 (5%)                         | 2 (3%)                                                                |
| 1.2 More thorough and quicker investigations                                                               | 2 (2%)                         | 1 (1%)                                                                |
| 1.3 Fewer demands on primary care – more staff or fewer patients                                           | 1 (1%)                         | 0                                                                     |
| 1.4 More time with clinicians for treatment and diagnosis                                                  | 2 (2%)                         | 0                                                                     |
| 1.9 Provision of resources to manage long term conditions                                                  | 1 (1%)                         | 0                                                                     |
| 1.10 Provision of patient travel service for routine appointments                                          | 1 (1%)                         | 0                                                                     |
| <b>2. Improved communication and involvement of patients</b>                                               | <b>26 (20%)</b>                | <b>18 (25%)</b>                                                       |
| 2.1 Listen to the patient and trust their judgement more                                                   | 21 (16%)                       | 15 (21%)                                                              |
| 2.2 Tell patients about their diagnosis, test results, changes in medication or loss of results            | 3 (2%)                         | 1 (1%)                                                                |
| 2.3 Improve communication between staff (within or outside primary care)                                   | 2 (2%)                         | 2 (3%)                                                                |
| <b>3. Better organisation and administration</b>                                                           | <b>17 (13%)</b>                | <b>10 (14%)</b>                                                       |
| 3.1 Follow up referrals and appointments to ensure they happen, be consistent in sending routine reminders | 10 (8%)                        | 3 (4%)                                                                |
| 3.2 Log in or process results as soon as received to avoid loss                                            | 1 (1%)                         | 1 (1%)                                                                |
| 3.3 Keep the notes up to date, well-organised, safe and ensure information is transcribed accurately       | 5 (4%)                         | 5 (7%)                                                                |
| 3.4 Keep a record of the location of equipment                                                             | 1 (1%)                         | 1 (1%)                                                                |
| <b>4. Improved prescribing systems</b>                                                                     | <b>18 (14%)</b>                | <b>17 (24%)</b>                                                       |
| 4.1 More checks on prescribing and dispensing                                                              | 8 (6%)                         | 8 (11%)                                                               |
| 4.2 Check repeat prescriptions carefully, especially for transcribing errors                               | 8 (6%)                         | 7 (10%)                                                               |
| 4.3 Use medication reviews and IT clinical decision support systems                                        | 2 (2%)                         | 2 (3%)                                                                |
| <b>5. Better clinical practice</b>                                                                         | <b>19 (14%)</b>                | <b>10 (14%)</b>                                                       |
| 5.1 Take in to account all the patient’s information - their medical history and results and letters       | 13 (10%)                       | 7 (10%)                                                               |
| 5.2 Address the patient’s problem in some way – patients can feel their problem is being ignored           | 5 (4%)                         | 2 (3%)                                                                |
| 5.3 Act on advice from other clinicians and test results                                                   | 1 (1%)                         | 1 (1%)                                                                |
| <b>6. Staff training</b>                                                                                   | <b>11 (8%)</b>                 | <b>7 (10%)</b>                                                        |
| 6.1 More informed and better trained staff                                                                 | 11 (8%)                        | 7 (10%)                                                               |
| <b>Other responses</b>                                                                                     | <b>27 (20%)</b>                | <b>6 (8%)</b>                                                         |
| •Don’t know/missing                                                                                        | 21 (16%)                       | 3 (4%)                                                                |
| •Problem was due to an individual member of staff                                                          | 2 (2%)                         | 1 (1%)                                                                |
| •Prescribe right, better, different, more, less medicine                                                   | 1 (1%)                         | 0                                                                     |
| •Better organisation                                                                                       | 1 (1%)                         | 0                                                                     |
| •Laboratory procedures were the problem                                                                    | 2 (2%)                         | 2 (3%)                                                                |

1 Table 5. Categorisation of patient-perceived potentially-harmful preventable problems occurring in  
 2 the last 12 months following review by clinicians and members of the public

| Group label         | Threshold criteria                                                                                       | Clinician scores<br>n=132 | Members of the public scores<br>n=132 |
|---------------------|----------------------------------------------------------------------------------------------------------|---------------------------|---------------------------------------|
| 1. Higher threshold | Median score of "very likely or certain" or "probably" or at least one score of "very likely or certain" | 18 (14%)                  | 87 (66%)                              |
| 2. Lower threshold  | Median score of "possibly" or at least one score of "probably" or higher                                 | 71 (54%)                  | 104(79%)                              |
| 3. Any possibility  | At least one score of "unlikely" or higher                                                               | 106 (80%)                 | 109 (83%)                             |
| 4. No problem       | All scores "definitely not" or not-coded                                                                 | 1 (1%)                    | 0                                     |
| 5. Not-coded        | Insufficient information for coding by all coders                                                        | 25 (19%)                  | 23 (17%)                              |

3

4



1  
2  
3 1 References  
4 2

- 5 3 1. Rhodes P, Campbell S, Sanders C. Trust, temporality and systems: how do patients understand  
6 4 patient safety in primary care? A qualitative study. *Health Expectations*. 2016;19(2):253-63.  
7 5  
8 6 2. Vincent C, Amalberti R. *Safer Healthcare: Strategies for the Real World*. Springer, 2016.  
9 7 <http://www.springer.com/gb/book/9783319255576> Accessed 04/04/17  
10 8  
11 9 3. Blendon RJ, DesRoches CM, Brodie M, Benson JM, Rosen AB, Schneider E, et al. Views of practicing  
12 10 physicians and the public on medical errors. *N Engl J Med*. 2002;347(24):1933-40.  
13 11  
14 12 4. Hotvedt R, Forde OH. Doctors are to blame for perceived medical adverse events. A cross  
15 13 sectional population study. *The Tromso Study. BMC health services research*. 2013;13:46.  
16 14  
17 15 5. Kuzel AJ, Woolf SH, Gilchrist VJ, Engel JD, LaVeist TA, Vincent C, et al. Patient reports of  
18 16 preventable problems and harms in primary health care. *Ann Fam Med*. 2004;2(4):333-40.  
19 17  
20 18 6. The Health Foundation. Evidence scan: Involving patients in improving safety. January 2013.  
21 19 <http://www.health.org.uk/sites/health/files/InvolvingPatientsInImprovingSafety.pdf> Accessed  
22 20 04/04/17  
23 21  
24 22 7. Basch E. The missing voice of patients in drug-safety reporting. *N Engl J Med*. 2010;362(10):865-9.  
25 23  
26 24 8. King A, Daniels J, Lim J, Cochrane DD, Taylor A, Ansermino JM. Time to listen: a review of methods  
27 25 to solicit patient reports of adverse events. *Qual Saf Health Care*. 2010;19(2):148-57.  
28 26  
29 27 9. Longtin Y, Sax H, Leape LL, Sheridan SE, Donaldson L, Pittet D. Patient participation: current  
30 28 knowledge and applicability to patient safety. *Mayo Clinic proceedings*. 2010;85(1):53-62.  
31 29  
32 30 10. Sanders J, Esmail A. The frequency and nature of medical error in primary care: understanding  
33 31 the diversity across studies. *Family practice*. 2003;20(3):231-6.  
34 32  
35 33 11. Panesar SS, deSilva D, Carson-Stevens A, Cresswell KM, Salvilla SA, Slight SP, et al. How safe is  
36 34 primary care? A systematic review. *BMJ Quality & Safety*. 2016;25(7):544-53.  
37 35  
38 36 12. Michel P, Brami J, Chaneliere M, Kret M, Mosnier A, Dupie I, et al. Patient safety incidents are  
39 37 common in primary care: A national prospective active incident reporting survey. *PLoS One*.  
40 38 2017;12(2):e0165455.  
41 39  
42 40 13. NHS Improvement. National quarterly data on patient safety incident reports. September 2016.  
43 41 [https://improvement.nhs.uk/resources/national-quarterly-data-patient-safety-incident-reports-](https://improvement.nhs.uk/resources/national-quarterly-data-patient-safety-incident-reports-september-2016/)  
44 42 [september-2016/](https://improvement.nhs.uk/resources/national-quarterly-data-patient-safety-incident-reports-september-2016/) Accessed 04/04/17  
45 43  
46 44 14. Hutchinson A, Young TA, Cooper KL, McIntosh A, Karnon JD, Scobie S, et al. Trends in healthcare  
47 45 incident reporting and relationship to safety and quality data in acute hospitals: results from the  
48 46 National Reporting and Learning System. *Qual Saf Health Care*. 2009;18(1):5-10.  
49 47  
50 48 15. NHS England. General practice patient safety reporting form launched. 26th February 2015.  
51 49 <https://www.england.nhs.uk/2015/02/gp-patient-safety-reporting/> Accessed 04/04/17  
52 50  
53  
54  
55  
56  
57  
58  
59  
60

- 1  
2  
3 1 16. The Health Foundation. Evidence Scan: Improving safety in primary care. November 2011.  
4 2 <http://www.health.org.uk/sites/health/files/ImprovingSafetyInPrimaryCare.pdf> Accessed 04/04/17  
5 3  
6 4 17. European Commission. Special Eurobarometer 411 Patient Safety and Quality of Care 2014.  
7 5 DOI:10.2772/33467  
8 6 [https://ec.europa.eu/health/sites/health/files/patient\\_safety/docs/ebs\\_411\\_sum\\_en.pdf](https://ec.europa.eu/health/sites/health/files/patient_safety/docs/ebs_411_sum_en.pdf)  
9 7 Accessed 04/04/17  
10 8  
11 9 18. Mira JJ, Nebot C, Lorenzo S, Perez-Jover V. Patient report on information given, consultation time  
12 10 and safety in primary care. Qual Saf Health Care. 2010;19(5):e33.  
13 11  
14 12 19. Wasson JH, MacKenzie TA, Hall M. Patients use an internet technology to report when things go  
15 13 wrong. Qual Saf Health Care. 2007;16(3):213-5.  
16 14  
17 15 20. Ricci-Cabello I, Goncalves DC, Rojas-Garcia A, Valderas JM. Measuring experiences and outcomes  
18 16 of patient safety in primary care: a systematic review of available instruments. Family practice.  
19 17 2015;32(1):106-19.  
20 18  
21 19 21. Ricci-Cabello I, Avery AJ, Reeves D, Kadam UT, Valderas JM. Measuring Patient Safety in Primary  
22 20 Care: The Development and Validation of the "Patient Reported Experiences and Outcomes of Safety  
23 21 in Primary Care" (PREOS-PC). Ann Fam Med. 2016;14(3):253-61.  
24 22  
25 23 22. Ricci-Cabello I, Saletti-Cuesta L, Slight SP, Valderas JM. Identifying patient-centred  
26 24 recommendations for improving patient safety in General Practices in England: a qualitative content  
27 25 analysis of free-text responses using the Patient Reported Experiences and Outcomes of Safety in  
28 26 Primary Care (PREOS-PC) questionnaire. Health Expectations. 2017.  
29 27  
30 28 23. Southwick FS, Cranley NM, Hallisy JA. A patient-initiated voluntary online survey of adverse  
31 29 medical events: the perspective of 696 injured patients and families. BMJ Qual Saf. 2015;24(10):620-  
32 30 9.  
33 31  
34 32 24. Stocks SJ, Giles SJ, Cheraghi-Sohi S, Campbell SM. Application of a tool for the evaluation of  
35 33 public and patient involvement in research. BMJ Open. 2015;5(3).  
36 34  
37 35 25. NHS England. GP Patient Survey – National summary report. January 2016. [http://gp-survey-](http://gp-survey-production.s3.amazonaws.com/archive/2016/January/January+2016+National+Summary+Report.pdf)  
38 36 [production.s3.amazonaws.com/archive/2016/January/January+2016+National+Summary+Report.pd](http://gp-survey-production.s3.amazonaws.com/archive/2016/January/January+2016+National+Summary+Report.pdf)  
39 37 [f](http://gp-survey-production.s3.amazonaws.com/archive/2016/January/January+2016+National+Summary+Report.pdf) Accessed 04/04/17  
40 38  
41 39 26. Dovey SM, Meyers DS, Phillips RL, Jr., Green LA, Fryer GE, Galliher JM, et al. A preliminary  
42 40 taxonomy of medical errors in family practice. Qual Saf Health Care. 2002;11(3):233-8.  
43 41  
44 42 27. Makeham MA, Dovey SM, County M, Kidd MR. An international taxonomy for errors in general  
45 43 practice: a pilot study. Med J Aust. 2002;177(2):68-72.  
46 44  
47 45 28. Kistler CE, Walter LC, Mitchell C, Sloane PD. Patient perceptions of mistakes in ambulatory care.  
48 46 Archives of Internal Medicine. 2010;170(16):1480-7.  
49  
50  
51  
52  
53  
54  
55  
56  
57  
58  
59  
60



Figure 2. Median estimates as to the likelihood that the patient describes a potentially-harmful preventable-problem occurring in the last 12 months by six clinicians and seven members of the public

170x102mm (300 x 300 DPI)

Review only

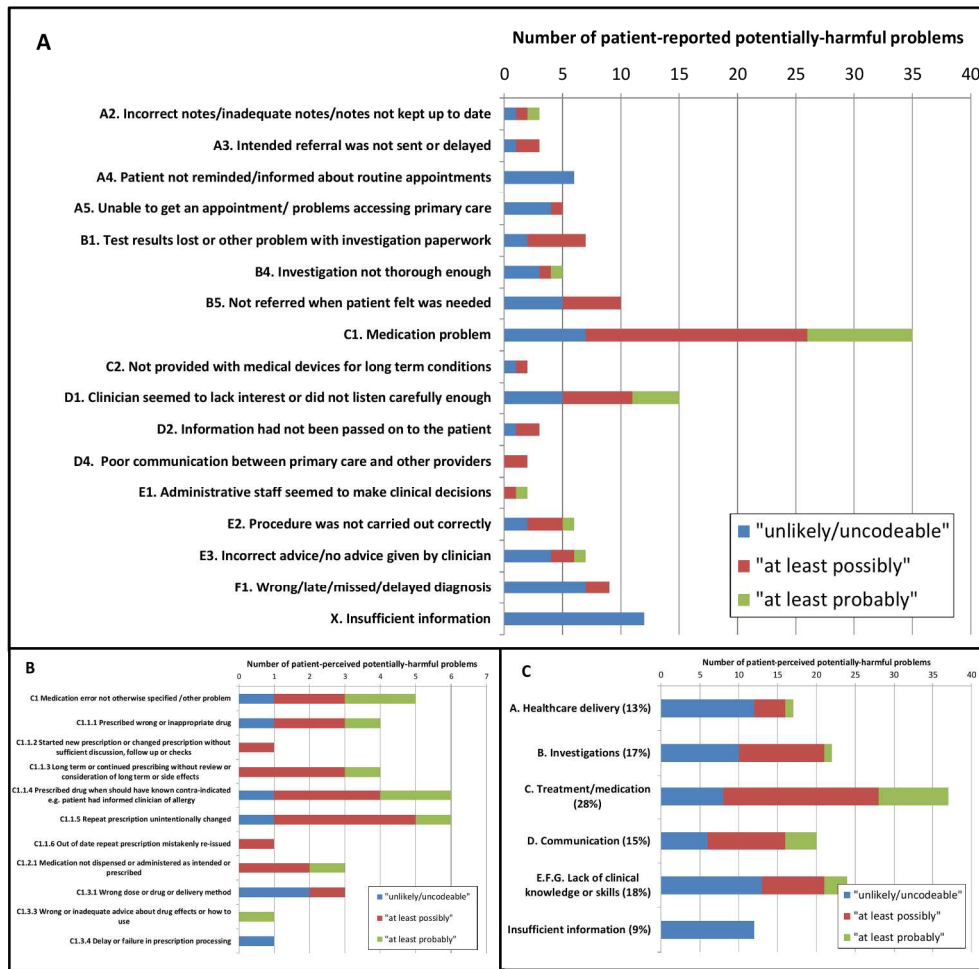

Footnote to Figure 1: See online Appendix 2 for details of coding; A coded to 2 levels, B medication problems coded to 3 levels, C coded to 1 level. † † Fig 1. Numbers of patient-perceived problems occurring in the last 12 months categorised according to the patient's description with clinician ranking as to the likelihood it is a potentially-harmful preventable problem (Table 3). † †

199x195mm (300 x 300 DPI)

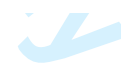

Appendix 1. Details of survey, coding systems, public and clinician contributors and supplementary results

**Box A. Pilot survey administered online November and December 2015**

Q1. Did you have confidence and trust in the GP you saw or spoke to at your last appointment?

Response options: Yes, definitely, Yes, to some extent, No, not at all, Don't know / can't say

Q2. When using primary care have you ever felt concerned that your health might be worsened, or actually was made worse, because of a mistake or a problem that could have been prevented?

Response options: Yes, No- *go to Q10*, Do not understand the question- *go to Q10*, Don't know / can't remember- *go to Q10*

Q3. How long ago did the mistake or preventable problem happen?

Response options: Within the last 12 months, More than 12 months ago- *go to Q10*, Can't remember- *go to Q10*

Q4. In your opinion did this experience

Response options: Make your health worse, Not certain but it might have made your health worse, Could have made your health worse if you had not noticed the problem, Delayed your treatment but had no effect on your health, Not affect you, or your health, Other, please explain

Q5. Which primary care service were you using when the mistake or preventable problem occurred?

Response options: GP surgery, Out of hours care, Walk in clinic, Dental, Pharmacy, Community or district nursing, Ambulance, Opticians, Other- please specify

Q6. Briefly describe the mistake or problem and how it happened

Response options: free text

Q7. Could the mistake or problem have been avoided? If so how?

Response options: free text

Q8. Were you able to talk about the mistake or problem with anybody working in the primary care service?

Response options: Yes, Yes had the opportunity but did not feel comfortable to discuss the mistake or problem, No I could not find anybody with whom I could discuss the mistake or problem, No I was not concerned about the problem, No I did not notice the mistake or problem at the time, I was too distressed to discuss the mistake or problem, Other or don't know - please describe

Q9. If you discussed the mistake or problem with somebody working in primary care please describe their job or role

Response options: free text

Q10. In the list below are some examples of preventable problems that might happen when using primary care. Has anything similar happened to you in the last 12 months? Please check as many as applicable or "NONE OF BELOW"

NONE OF BELOW

Wrong or late diagnosis

Not referred for further investigation when needed

Test results being lost or mixed up

Receiving the wrong medicine or wrong dose

Should not be prescribed the medicine because of another health problem

Should not be prescribed the medicine because of another medication already taking

Poor communication leading to misunderstanding of diagnosis or treatment

Not referred to a specialist when needed

1  
2  
3  
4  
5  
6  
7  
8  
9  
10  
11  
12  
13  
14  
15  
16  
17  
18  
19  
20  
21  
22  
23  
24  
25  
26  
27  
28  
29  
30  
31  
32

Unclear instructions about treatment  
 Not offering of prevention or screening programmes eg CVD/stroke prevention clinics  
 Failure to recognise or act on vulnerable people's needs eg child abuse, suicide risk or mental health problems  
 Mistake with a procedure eg dental treatment, injection, ear syringing, physiotherapy  
 Failure to notify about recommended vaccinations eg flu, HPV  
 Poor hygiene  
 Unsafe building or premises  
 Any other preventable problem in the last 12 months (in your opinion)  
 Other, please explain below

Q11. Are you male or female? Response options: Male, Female, prefer not to say

Q12. How old are you?  
Response options: under 16, 16 to 24, 25 to 34, 45 to 54, 55 to 64, 65 to 74, 75 to 84, 85 or older

Q13. When was your last contact with primary care?  
Response options: Last week, Last month, Last 12 months, Over 12 months ago

Q14. What best describes your usual pattern of use of primary care? Response options: Once per week, Once per 2 weeks, Once per month, Once per 6 months, Once per 12 months or less often

Q15. Are you registered with a GP practice?  
Response options: Yes, No, I only use walk in centres, Don't know

Q16. Do you work or volunteer in healthcare or healthcare research as a professional, patient, carer or member of the public? (if you are retired answer for your occupation before retirement)  
Response options: Yes, No

Q17. We are still trying to improve this questionnaire so would be grateful for any feedback about how easy you found the questionnaire to complete? How can it be improved?  
Response options: free text

33  
34  
35

**Box B. List of public and patient involvement groups used to distribute the pilot survey**

36  
37  
38

Associate Research User Group of the Greater Manchester Primary Care Patient Safety Translational Research Centre <http://research.bmh.manchester.ac.uk/primary-care-patient-safety/GetInvolved/>

39  
40  
41

The Primary Care Research in Manchester Engagement Resource  
<http://research.bmh.manchester.ac.uk/PRIMER/about/>

42  
43  
44

HelpBeatDiabetes <https://www.researchforthefuture.org/diabetes/>

45  
46

The Nowgen Centre <https://research.cmft.nhs.uk/getting-involved/involvement>

47  
48

The Citizen Scientist project <http://www.citizenscientist.org.uk/>

49  
50  
51

North West People in Research Forum <https://www.northwestpeopleinresearchforum.org/>

Table A. Coding of patient-reported potentially-unsafe scenarios in primary care

| <b>1. Errors in the process of the healthcare delivery system</b>                                                                                                                                                                                                                                                                                                                                                                  |                                                                                                                                                                                                                                                                                                                                             |
|------------------------------------------------------------------------------------------------------------------------------------------------------------------------------------------------------------------------------------------------------------------------------------------------------------------------------------------------------------------------------------------------------------------------------------|---------------------------------------------------------------------------------------------------------------------------------------------------------------------------------------------------------------------------------------------------------------------------------------------------------------------------------------------|
| Makeham 2002, Dovey 2002                                                                                                                                                                                                                                                                                                                                                                                                           | Common threads reported in this study                                                                                                                                                                                                                                                                                                       |
| 1.1. Errors in the process of conducting an administrative task                                                                                                                                                                                                                                                                                                                                                                    | A1. Administrative problem not otherwise specified                                                                                                                                                                                                                                                                                          |
| 1.1.1. Information filed in wrong place or wrong time                                                                                                                                                                                                                                                                                                                                                                              |                                                                                                                                                                                                                                                                                                                                             |
| 1.1.2. Unavailability of information that should have been in patients charts<br>1.1.2.1. Entire chart or part of chart could not be accessed when needed<br>1.1.2.2. Care provided was not documented<br>1.1.2.3. Item(s) of information missing from chart                                                                                                                                                                       | A2. Incorrect notes/inadequate notes/notes not kept up to date                                                                                                                                                                                                                                                                              |
| 1.1.3. Errors in patient's movement through the healthcare delivery system                                                                                                                                                                                                                                                                                                                                                         | A3. Intended referral was not sent or delayed<br>A4. Patient not reminded, informed or assisted to attend regular check-ups or other necessary routine treatments                                                                                                                                                                           |
| 1.1.4. Errors in the taking and distributing of messages                                                                                                                                                                                                                                                                                                                                                                           |                                                                                                                                                                                                                                                                                                                                             |
| 1.1.5. Errors in managing appointments for healthcare                                                                                                                                                                                                                                                                                                                                                                              | A5. Unable to get an appointment/other problems with making appointment<br>A6. Ambulance delayed or did not arrive                                                                                                                                                                                                                          |
| <b>1.2. Errors in the process of investigating a patient's condition</b>                                                                                                                                                                                                                                                                                                                                                           |                                                                                                                                                                                                                                                                                                                                             |
| 1.2.1. Laboratory errors<br>1.2.1.1. Wrong test ordered or test not ordered when appropriate<br>1.2.1.2. Errors in the process of obtaining or processing a laboratory specimen<br>1.2.1.3. Error in the process of physician receiving accurate laboratory results in a timely fashion<br>1.2.1.4. Inappropriate response to an abnormal laboratory result                                                                        | B1. Test results lost or other problem with investigation paperwork<br>B2. Incorrect interpretation of tests or other investigation results<br>B3. Clinician did not consider patient history sufficiently/did not use patient's notes adequately<br>B4. Investigation not thorough enough<br>B5. Not referred when patient felt was needed |
| 1.2.3. Errors in the processes of other investigations<br>1.2.3.1. Wrong test ordered or test not ordered when appropriate<br>1.2.3.2. Errors in the process of obtaining or processing of other diagnostic investigation<br>1.2.3.3. Error in the process of physician receiving accurate test results of other investigation in a timely fashion<br>1.2.3.4. Inappropriate response to an abnormal result of other investigation |                                                                                                                                                                                                                                                                                                                                             |
| <b>1.3. Errors in the process of treating a patient's condition</b>                                                                                                                                                                                                                                                                                                                                                                |                                                                                                                                                                                                                                                                                                                                             |
| 1.3.1. Errors in the process of treating with medications<br>1.3.1.1. Wrong medication or wrong dose of medication ordered or medication not ordered by physician when appropriate<br>1.3.1.2. Error in the process of delivering a medication order or inappropriate medication order by a provider working under physician supervision<br>1.3.1.3. Error in the process of dispensing medication as ordered                      | C1. Medication problem<br><br>C2. Not provided with medical devices needed to manage long term conditions                                                                                                                                                                                                                                   |

|                                                                                                                                                                                                                               |                                                                                                                                                                                                                                                                                               |
|-------------------------------------------------------------------------------------------------------------------------------------------------------------------------------------------------------------------------------|-----------------------------------------------------------------------------------------------------------------------------------------------------------------------------------------------------------------------------------------------------------------------------------------------|
| 1.3.2. Errors in other treatments                                                                                                                                                                                             | C3. Problem with dental treatment or diagnosis                                                                                                                                                                                                                                                |
| <b>1.4. Errors in the process of communication</b>                                                                                                                                                                            |                                                                                                                                                                                                                                                                                               |
| 1.4.1. Errors in communication between primary healthcare provider and patients                                                                                                                                               | D1. Clinician seemed to lack interest in the patient's health problem or did not listen carefully enough<br>D2. Information about the patient's health had not been passed on to the patient who felt it should have been<br>D3. Communication problem between patient and primary care staff |
| 1.4.2. Errors in communication between healthcare providers                                                                                                                                                                   | D4. Problem with communication between primary care and other types of care including secondary care<br>D5. Disagreement between 2 clinicians                                                                                                                                                 |
| <b>2. Errors arising from lack of clinical knowledge or skills</b>                                                                                                                                                            |                                                                                                                                                                                                                                                                                               |
| 2.1. Errors in the execution of a clinical task<br>2.1.1. Non-clinical staff made the wrong clinical decision<br>2.1.2. Failed to follow standard practice<br>2.1.3. Lacked needed experience or expertise in a clinical task | E1. Administrative staff seemed to make clinical decisions<br>E2. Procedure was not carried out correctly<br>E3. Incorrect advice/no advice given by clinician                                                                                                                                |
| <b>2.2. Errors in diagnosis</b><br>2.2.1. Wrong or delayed diagnosis                                                                                                                                                          | F1. Wrong/late/missed/delayed diagnosis                                                                                                                                                                                                                                                       |
| <b>2.3. Wrong treatment decision</b>                                                                                                                                                                                          | G1. Wrong treatment decision                                                                                                                                                                                                                                                                  |
|                                                                                                                                                                                                                               | H. Other                                                                                                                                                                                                                                                                                      |
|                                                                                                                                                                                                                               | X. Not a problem/ insufficient information/refused/don't know                                                                                                                                                                                                                                 |

Table B. Level 4 coding of patient-reported potentially-unsafe medication scenarios

|                                                                                                                                                                 |
|-----------------------------------------------------------------------------------------------------------------------------------------------------------------|
| Common threads reported in this study grouped as described by Makeham 2002, Dovey 2002                                                                          |
| C1 Medication error not otherwise specified /other problem                                                                                                      |
| • <b>1.3.1.1. Ordering medications (prescribing)</b>                                                                                                            |
| C1.1.1 Prescribed wrong or inappropriate drug                                                                                                                   |
| C1.1.2 Started new prescription or changed prescription without sufficient discussion, follow up or checks                                                      |
| C1.1.3 Long term or continued prescribing without review or consideration of long term or side effects                                                          |
| C1.1.4 Prescribed drug when should have known contra-indicated <i>e.g.</i> patient had informed clinician of allergy, adverse reaction or it was in the records |
| C1.1.5 Repeat prescription unintentionally changed                                                                                                              |
| C1.1.6 Out of date repeat prescription mistakenly re-issued                                                                                                     |
| • <b>1.3.1.2./1.3.1.3. Implementing or receiving medications (dispensing or issuing)</b>                                                                        |
| C1.2.1 Medication not dispensed or administered as intended or prescribed                                                                                       |
| • <b>1.3.1.1./1.3.1.2./1.3.1.3. Ordering, implementing or receiving medications</b>                                                                             |
| C1.3.1 Wrong dose or drug or delivery method                                                                                                                    |
| C1.3.2 Being given another patient's drugs or prescription                                                                                                      |
| C1.3.3 Wrong or inadequate advice about drug effects or how to use                                                                                              |
| C1.3.4 Delay or failure in prescription processing                                                                                                              |



Table C. Demographics of clinicians and members of the public reviewing the patient-reported problems and estimating the likelihood the scenarios describes a potentially-harmful preventable problem occurring in primary care

|                                                                                                                                                                                                                                                                  |                      |
|------------------------------------------------------------------------------------------------------------------------------------------------------------------------------------------------------------------------------------------------------------------|----------------------|
| <b>Demographics of GP and dentist coders</b>                                                                                                                                                                                                                     | <b>frequency n=6</b> |
| <b>Gender</b>                                                                                                                                                                                                                                                    |                      |
| Female                                                                                                                                                                                                                                                           | 3                    |
| Male                                                                                                                                                                                                                                                             | 3                    |
| <b>Years working as a GP or dentist</b>                                                                                                                                                                                                                          |                      |
| Less than 15 years                                                                                                                                                                                                                                               | 1                    |
| 15 to 25 years                                                                                                                                                                                                                                                   | 2                    |
| Over 25 years                                                                                                                                                                                                                                                    | 3                    |
| <b>Current position</b>                                                                                                                                                                                                                                          |                      |
| Partner                                                                                                                                                                                                                                                          | 4                    |
| Retired within last 12 months                                                                                                                                                                                                                                    | 2                    |
| <b>Demographics of the members of the public</b>                                                                                                                                                                                                                 |                      |
| <b>frequency n=7</b>                                                                                                                                                                                                                                             |                      |
| <b>Gender</b>                                                                                                                                                                                                                                                    |                      |
| Female                                                                                                                                                                                                                                                           | 6                    |
| Male                                                                                                                                                                                                                                                             | 1                    |
| <b>Age</b>                                                                                                                                                                                                                                                       |                      |
| 30 to 39 years                                                                                                                                                                                                                                                   | 2                    |
| 40 to 49 years                                                                                                                                                                                                                                                   | 1                    |
| 50 to 59 years                                                                                                                                                                                                                                                   | 2                    |
| 60 to 69 years                                                                                                                                                                                                                                                   | 2                    |
| <b>Ethnicity</b>                                                                                                                                                                                                                                                 |                      |
| White British                                                                                                                                                                                                                                                    | 5                    |
| British Indian                                                                                                                                                                                                                                                   | 2                    |
| <b>Years of PPI experience</b>                                                                                                                                                                                                                                   |                      |
| None                                                                                                                                                                                                                                                             | 2                    |
| Less than 1 year                                                                                                                                                                                                                                                 | 1                    |
| 1 to 5 years                                                                                                                                                                                                                                                     | 2                    |
| Over 5 years                                                                                                                                                                                                                                                     | 2                    |
| <b>Further background information</b>                                                                                                                                                                                                                            |                      |
| PPI reviewer 1. Currently working freelance on education and PPI projects; previously worked in a pastoral role at a college; a lay representative for courses training healthcare scientists.                                                                   |                      |
| PPI reviewer 2. Retired primary school teacher with several long term health conditions; single parent; was a young carer for a parent with a long term condition.                                                                                               |                      |
| PPI reviewer 3. Former higher education administrator; current university tutor; patient partner on varied research projects; carer for family members aged 0-100 with physical and/or mental health long term conditions.                                       |                      |
| PPI reviewer 4. Currently working as a civil servant and has several long term health conditions.                                                                                                                                                                |                      |
| PPI reviewer 5. Full-time parent of school age children; previously ten years working in a medical school in an administrative role and 5 years working in the drug and alcohol sector                                                                           |                      |
| PPI reviewer 6. Lay representative for several healthcare-related professional bodies and involved in health research at several universities; family-carer for over 35 years; has had over 6 years of involvement with a mental and community health as a carer |                      |
| PPI reviewer 7. Retired university administrator; a parent and carer for elderly parents.                                                                                                                                                                        |                      |

Table D. Scoring for likelihood that the patient-reported scenario is potentially-harmful preventable-problem

| Score | How likely do you think it is the patient was correct in thinking that their health might be worsened, or actually was made worse, because of a mistake or a problem in primary care that could have been prevented? Choose from the options below. |
|-------|-----------------------------------------------------------------------------------------------------------------------------------------------------------------------------------------------------------------------------------------------------|
| 5     | Very likely or certain (75-100% confident is a potentially-harmful preventable-problem)                                                                                                                                                             |
| 4     | Probably (50-74% confident is a potentially-harmful preventable-problem)                                                                                                                                                                            |
| 3     | Possibly (25-49% confident is a potentially-harmful preventable-problem)                                                                                                                                                                            |
| 2     | Unlikely (bottom 25% confident is a potentially-harmful preventable-problem)                                                                                                                                                                        |
| 1     | Definitely not a potentially unsafe event (0% chance is a potentially-harmful preventable-problem)                                                                                                                                                  |
| -     | Insufficient information                                                                                                                                                                                                                            |
| -     | Don't know                                                                                                                                                                                                                                          |
| -     | Other - add text at end of row                                                                                                                                                                                                                      |



Figure A. Flow chart of participants who reported a potentially-unsafe preventable-problem in primary care through the online pilot survey

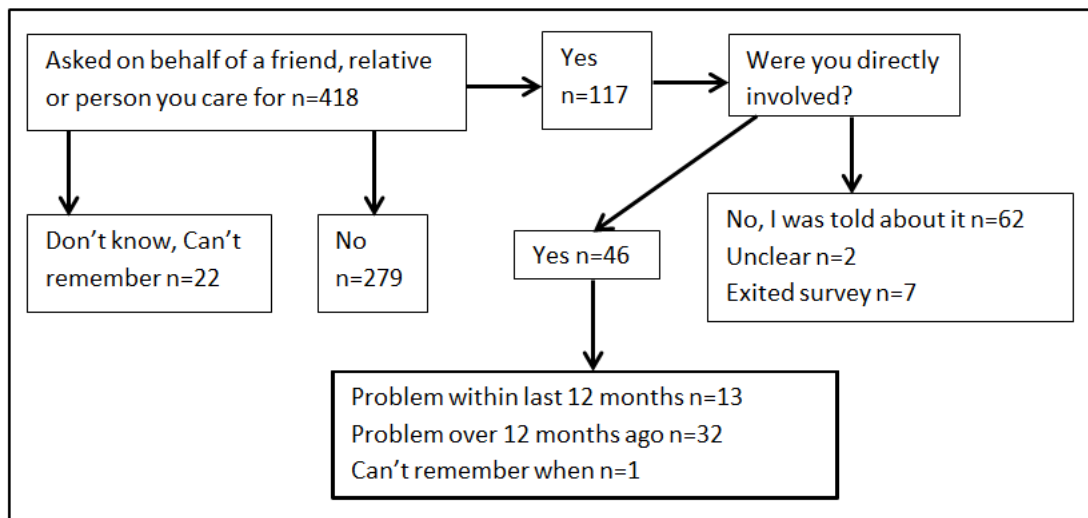

Figure B. Flow chart of participants who reported a potentially-unsafe preventable-problem in primary care on behalf of another person through the online pilot survey



Fig C. Numbers of patient-perceived problems occurring in the last 12 months categorised according to the patient's description (see Table 2) and route through survey *i.e.* originated from open-ended question (Q2) or prompted by list of potential safety problems (Q10)



Fig D. Numbers of patient-perceived problems occurring in the last 12 months categorised according to the patient's description coded at a higher level (see Table 2) and route through survey *i.e.* originated from open-ended question (Q2) or prompted by list of potential safety problems (Q10)

## Appendix 2. Boxes 1 to 15

Patient reported scenarios occurring during the past 12 months that GPs scored as higher likelihood to be a potentially-unsafe preventable-problem in primary care (median score is higher than "possibly" and at least 2 GPs gave a score or one GP scored "very likely or certain")

### Scenario1. GP surgery

**Briefly describe the mistake or problem and how it happened.** "Prescription drug, anti-inflammatory for arthritis, caused acute stomach pains & violent vomiting. Repeat prescription for twelve years without any discussion."

**Could the mistake or problem have been avoided? If so how?** "Possible discussion about dangers of continuous taking of prescription drugs, which in the event were stopped after the incident."

**Were you able to talk about the mistake or problem with anybody working in the primary care service?** "No I did not notice the mistake or problem at the time"

**Patient-reported prospect of harm:** suspected your health has been made worse by a problem or error that could have been prevented

**Patient-perspective problem-type code:** C1.1.3 Long term or continued prescribing without review or consideration of long term or side effects

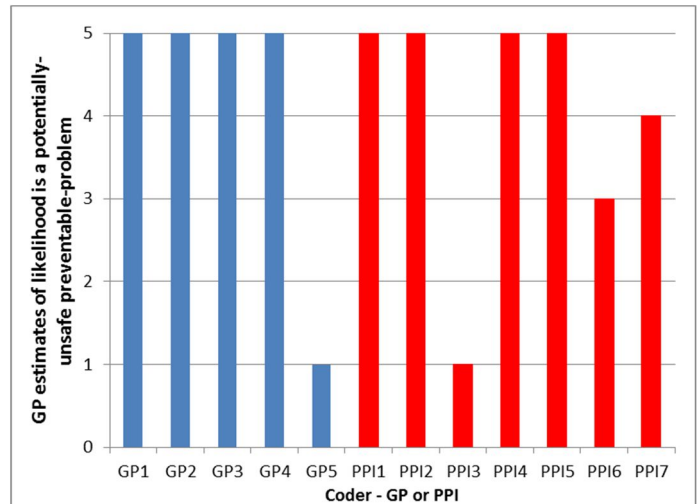

5=very likely or certain, 4=probably, 3=possibly, 2=unlikely, 1=definitely not, 0 = insufficient information or don't know

### Scenario2. GP surgery

**Briefly describe the mistake or problem and how it happened.** "Insulin type was changed by specialist but previous insulin prescribed by GP as notes had not been updated"

**Could the mistake or problem have been avoided? If so how?** "Yes GP notes should have been updated with new medication"

**Were you able to talk about the mistake or problem with anybody working in the primary care service?** "Practice manager resolved the problem and apologised"

**Patient-reported prospect of harm:** prompted via Q10 (Box 1 main paper)

**Patient-perspective problem-type code:** A2. Incorrect notes/inadequate notes/notes not kept up to date; C1.1.6 Out of date repeat prescription mistakenly re-issued

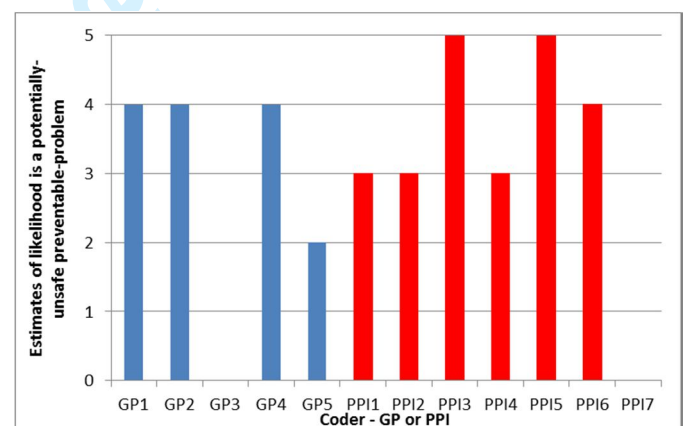

5=very likely or certain, 4=probably, 3=possibly, 2=unlikely, 1=definitely not, 0 = insufficient information or don't know

**Scenario3. GP surgery**

**Briefly describe the mistake or problem and how it happened.** *“Two out of three Doctors not listening to what I was asking; April I had two big bleeds from my Penis, Doctor 1 did a test and gave antibiotics. Went to 2nd Doctor for Diabetic check and told him of problem - nothing except another test come back in ten days. Went to the third doctor who said the test didn't show anything but when I mentioned my feelings about a problem, he look and said yes you do have a problem. In 2 weeks I was in having tests and 3 operations for cancer.”*

**Could the mistake or problem have been avoided? If so how?** *“Listen to me”*

**Were you able to talk about the mistake or problem with anybody working in the primary care service?** *“No, I could not find anybody with whom I could discuss the mistake or problem (The third doctor was amazing with me. He said to keep in touch and if I had any problems to ring him and he still wants me to ring him after my three operations.)”*

**Patient-reported prospect of harm:** suspected your health has been made worse by a problem or error that could have been prevented

**Patient-perspective problem-type code:** D1. Clinician seemed to lack interest in the patient’s health problem or did not listen carefully enough; F1. Wrong/late/missed/delayed diagnosis

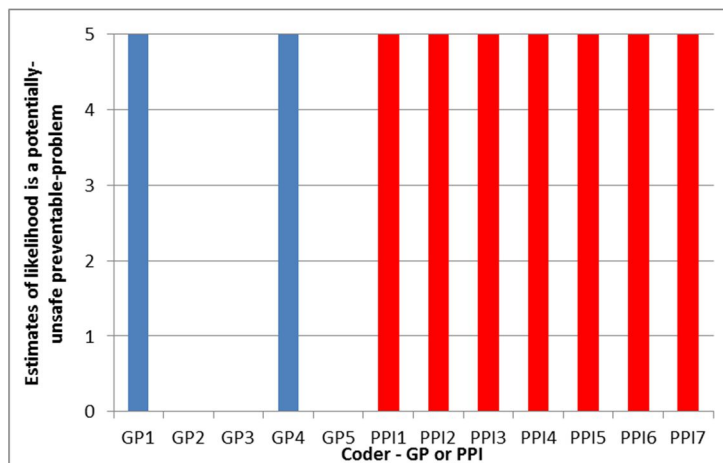

5=very likely or certain, 4=probably, 3=possibly, 2=unlikely, 1=definitely not, 0 = insufficient information or don't know

**Scenario4. GP surgery**

**Briefly describe the mistake or problem and how it happened.** *“Changed diabetes medication to an alternative which my notes from 1980's should show I respond badly to”*

**Could the mistake or problem have been avoided? If so how?** *“Read the notes on every medication change but unfortunately that is unrealistic under the time restrictions on GP's. Put early notes on-line and flag medication allergies/problems.”*

**Were you able to talk about the mistake or problem with anybody working in the primary care service?** *“Yes, my own GP who had returned from holiday”*

**Patient-reported prospect of harm:** suspected your health has been made worse by a problem or error that could have been prevented

**Patient-perspective problem-type code:** C1.1.4 Prescribed drug when should have known contra-indicated e.g. patient had informed clinician of allergy, adverse reaction or it was in the records



5=very likely or certain, 4=probably, 3=possibly, 2=unlikely, 1=definitely not, 0 = insufficient information or don't know

**Scenario5. GP surgery**

**Briefly describe the mistake or problem and how it happened.** *"Told the GP the medication was making my hair fall out & he kept me on it for another 3 months. I had to see another GP to get him to change my medication. In the meantime I have lost 3/4 of my hair. Not sure if it will ever grow back."*

**Could the mistake or problem have been avoided? If so how?** *"yes, by the GP listening to*

*what I was saying."*

**Were you able to talk about the mistake or problem with anybody working in the primary care service?** *"Yes, GP"*

**Patient-reported prospect of harm:** suspected your health has been made worse by a problem or error that could have been prevented

**Patient-perspective problem-type code:** D1. Clinician seemed to lack interest in the patient's health problem or did not listen carefully enough; C1.1.3 Long term or continued prescribing without review or consideration of long term or side effects

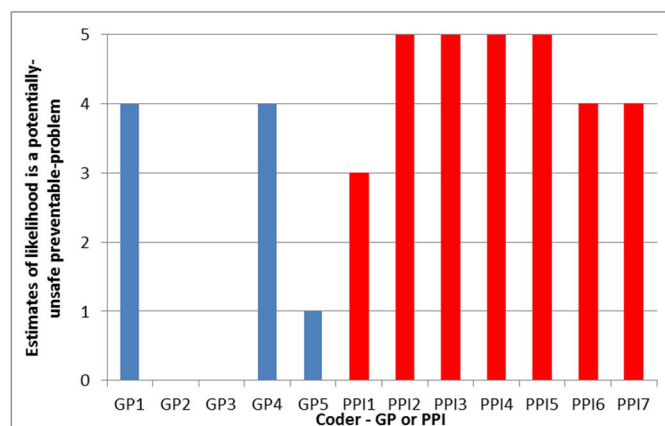

5=very likely or certain, 4=probably, 3=possibly, 2=unlikely, 1=definitely not, 0 = insufficient information or don't know

**Scenario6. GP surgery**

**Briefly describe the mistake or problem and how it happened.** *"Successfully treated for prostate cancer 2006 but suffered some loss of sexual performance; Viagra recommended BUT I take isosorbide nitrate for a following heart attack; the two are contradictory and could produce further heart problems. A routine diabetes check-up at which the sexual problem was discussed saw an automatic prescribing of Viagra; obviously without reference to my medical records."*

**Could the mistake or problem have been avoided? If so how?** *"Read the medical notes."*

**Were you able to talk about the mistake or problem with anybody working in the primary care service?** *"No; I felt I was going to cause trouble"*

**Patient-reported prospect of harm:** prompted via Q10 (Box 1 main paper)

**Patient-perspective problem-type code:** C1.1.1 Prescribed wrong or inappropriate drug

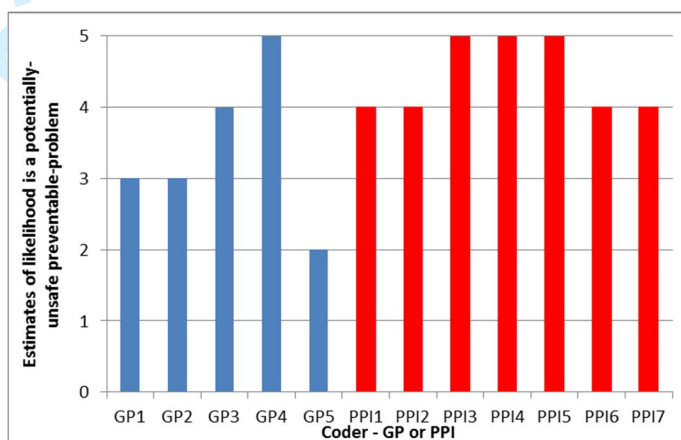

5=very likely or certain, 4=probably, 3=possibly, 2=unlikely, 1=definitely not, 0 = insufficient information or don't know

**Scenario7. GP surgery**

**Briefly describe the mistake or problem and how it happened.** *“I was given steroids for a chest infection but not alerted to the fact they make your sugars go massively high! Within a few hours I was high and not able to bring them down, fearing a DKA I headed for the hospital to correct a very easily avoidable issue. I also attended my GP 6 years ago to be given strong antacids for pain in my stomach that was actually a DKA I was admitted to hospital a few hours later! The GP never even*

*suggested it could be linked to my diabetes and as it was my first DKA I had no idea that's how they can feel”*

**Could the mistake or problem have been avoided? If so how?** *“Both could have been avoided The steroids - if the prescribing nurse had considered my diabetes I'd have been given proper advice as to how to deal with them as a diabetic or given different meds. The DKA simple questions or explanation as to how DKAs can present would have made me family and the doctor realise I was in trouble.”*

**Were you able to talk about the mistake or problem with anybody working in the primary care service?** *“I wrote a letter to the surgery concerning the steroids anonymously to alert them of my concern and the DKA. I was too poorly to even consider seeking correction or explanation”*

**Patient-reported prospect of harm:** health was actually made worse by a problem or error that could have been prevented

**Patient-perspective problem-type code:** C1.1.4 Prescribed drug when should have known contra-indicated e.g. patient had informed clinician of allergy, adverse reaction or it was in the records; E3. Incorrect advice/no advice given by clinician



5=very likely or certain, 4=probably, 3=possibly, 2=unlikely, 1=definitely not, 0 = insufficient information or don't know

**Scenario8. GP surgery**

**Briefly describe the mistake or problem and how it happened.** *“reception staff making clinical decisions which were at odds with what had been discussed with my GP”*

**Could the mistake or problem have been avoided? If so how?** *“Yes, reception staff shouldn't be making clinical decisions”*

**Were you able to talk about the mistake or problem with anybody working in the primary care service?** *“No, had the opportunity but did not feel comfortable to discuss the mistake or problem”*

**Patient-reported prospect of harm:** suspected your health has been made worse by a problem or error that could have been prevented

**Patient-perspective problem-type code:** E1. Administrative staff seemed to make clinical decisions



5=very likely or certain, 4=probably, 3=possibly, 2=unlikely, 1=definitely not, 0 = insufficient information or don't know



**Scenario9. Pharmacist**

**Briefly describe the mistake or problem and how it happened.** *"I was given a medicine belonging to somebody else as part of my monthly repeat prescription"*

**Could the mistake or problem have been avoided? If so how?** *"More care and attention when checking"*

**Were you able to talk about the mistake or problem with anybody working in the primary care service?** *"Yes, pharmacist"*



**Patient-reported prospect of harm:** prompted via Q10 (Box 1 main paper)

5=very likely or certain, 4=probably, 3=possibly, 2=unlikely, 1=definitely not, 0 = insufficient information or don't know

**Patient-perspective problem-type code:** C1.3.3

Wrong or inadequate advice about drug effects or how to use

**Scenario10. GP surgery**

**Briefly describe the mistake or problem and how it happened.** *"Poor diabetic annual review, foot check not correctly done just tested my foot pulses and nothing else"*

**Could the mistake or problem have been avoided? If so how?** *"Better training of staff"*

**Were you able to talk about the mistake or problem with anybody working in the primary care service?** *"No, had the opportunity but did not feel comfortable to discuss the mistake or problem"*



**Patient-reported prospect of harm:** suspected your health has been made worse by a problem or error that could have been prevented

5=very likely or certain, 4=probably, 3=possibly, 2=unlikely, 1=definitely not, 0 = insufficient information or don't know

**Patient-perspective problem-type code:** E2. Procedure was not carried out correctly

**Scenario11. GP surgery**

**Briefly describe the mistake or problem and how it happened.**

*“Prior to a pain killing injection into my knee, I asked the GP who suggested the injection AND the GP who carried out the injection whether, as someone living with Type 1 diabetes, it would have any effect on my blood glucose levels. On both occasions, I was given an unequivocal No . In the event, within a few hours of the injection, my blood glucose rose significantly and remained high for several days. I felt unable to eat anything for 24 hours while I took on more and more insulin in order to bring my glucose levels down - I did not want to go to sleep that night simply because of the massive amount of insulin in my system.”*

**Could the mistake or problem have been avoided? If so how?** *“Yes. I feel that both GPs should have a knowledge about the side effects of drugs they prescribe, administer and recommend.”*

**Were you able to talk about the mistake or problem with anybody working in the primary care service?** *“No I could not find anybody with whom I could discuss the mistake or problem”*

**Patient-reported prospect of harm:** your health has been made worse by a problem or error that could have been prevented

**Patient-perspective problem-type code:** E3. Incorrect advice/no advice given by clinician

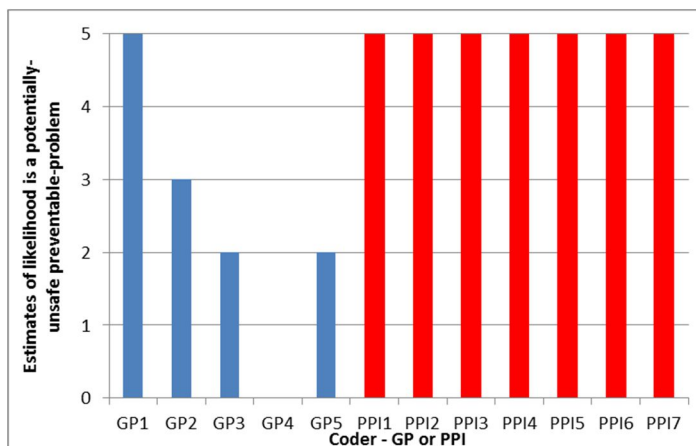

5=very likely or certain, 4=probably, 3=possibly, 2=unlikely, 1=definitely not, 0 = insufficient information or don't know

**Scenario12. GP surgery**

**Briefly describe the mistake or problem and how it happened.**

*“GP completely overlooked symptoms and prescribed antibiotic after antibiotic without investigation or referral”*

**Could the mistake or problem have been avoided? If so how?** *“Yes by listening to history of complaints, carrying out appropriate tests instead of just giving antibiotics”*

**Were you able to talk about the mistake or problem with anybody working in the primary care service?** *“No I did not notice the mistake or problem at the time”*

**Patient-reported prospect of harm:** prompted via Q10 (Box 1 main paper)

**Patient-perspective problem-type code:** D1. Clinician seemed to lack interest in the patient's health problem or did not listen carefully enough; F1. Wrong/late/missed/delayed diagnosis

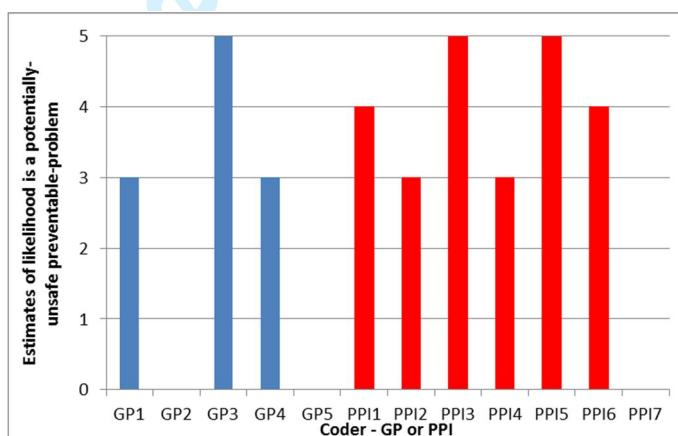

5=very likely or certain, 4=probably, 3=possibly, 2=unlikely, 1=definitely not, 0 = insufficient information or don't know

**Scenario13. GP surgery**

**Briefly describe the mistake or problem and how it happened.** *“Several times prescriptions have been incorrectly issued due to similar names for drugs or the same name with different strengths”*

**Could the mistake or problem have been avoided? If so how?** *“Yes, by more accurate or double data entry. Now solved by self-request using web systems.”*

**Were you able to talk about the mistake or problem with anybody working in the primary care service?** *“Yes, they did not want to know or seem to care unless a formal complaint was made”*

**Patient-reported prospect of harm:** your health has been made worse by a problem or error that could have been prevented

**Patient-perspective problem-type code:** C1.1.5 Repeat prescription unintentionally changed



5=very likely or certain, 4=probably, 3=possibly, 2=unlikely, 1=definitely not, 0 = insufficient information or don't know

**Scenario14. GP surgery**

**Briefly describe the mistake or problem and how it happened.** *“A simple error occurred with an incorrect prescription. When I tried to bring this to the attention of the receptionist she treated me with disdain and in a challenging manner. She then proceeded to start to read my notes aloud in the public reception area. I felt that this was unacceptable behaviour. When I tried to tackle the receptionist about her behaviour I felt as if I was under threat. It caused me to feel very stressed, frustrated and ill tempered.”*

**Could the mistake or problem have been avoided? If so how?** *“If the receptionist had been willing to listen to what I was saying.”*

**Were you able to talk about the mistake or problem with anybody working in the primary care service?** *“I did speak to a lady who said she was the practice manager but I felt that they were not interested in resolving the problem”*

**Patient-reported prospect of harm:** suspected your health has been made worse by a problem or error that could have been prevented

**Patient-perspective problem-type code:** D3. Communication problem between patient and primary care staff; C1 Medication error not otherwise specified /other problem



5=very likely or certain, 4=probably, 3=possibly, 2=unlikely, 1=definitely not, 0 = insufficient information or don't know

**Scenario15. GP Surgery**

**Briefly describe the mistake or problem and how it happened.**

*“Went to see GP because I feared the pain in one of my legs may have been Peripheral Artery Disease - hardening of the arteries, having had a (non-blood) relative who suffered from this and subsequently died - of a heart attack. Oh yes, said the GP, well, you will have it won't you? Why? I asked expecting her to say eg because you are a smoker, or maybe my age (65) or something else I wasn't aware of. But what she actually told me was 'Because you are a diabetic!' Whaaat? I exclaimed - you mean ALL diabetics will inevitably get this, and there's no way to prevent it? Yes she said and shrugged. I said 'Thanks for nothing then' and left. Instead I left, came home and went straight on-line to make an appointment with someone more sensible, which I did and after taking my leg/ankle pulses and BPs etc - he chatted to me and said he would refer me for a cardiology consultation at the hospital. This IS what I expected in the first place and now it IS being taken care of.”*

**Could the mistake or problem have been avoided? If so how?** *“By training the GP properly in the first place”*

**Were you able to talk about the mistake or problem with anybody working in the primary care service?** *“I explained to GP 2 But I don't know what if anything was done about it, or how I could find that out.”*

**Patient-reported prospect of harm:** your health has been made worse by a problem or error that could have been prevented

**Patient-perspective problem-type code:** D1. Clinician seemed to lack interest in the patient’s health problem or did not listen carefully enough



5=very likely or certain, 4=probably, 3=possibly, 2=unlikely, 1=definitely not, 0 = insufficient information or don't know

1  
2  
3  
4  
5  
6  
7  
8  
9  
10  
11  
12  
13  
14  
15  
16  
17  
18  
19  
20  
21  
22  
23  
24  
25  
26  
27  
28  
29  
30  
31  
32  
33  
34  
35  
36  
37  
38  
39  
40  
41  
42  
43  
44  
45  
46  
47  
48  
49  
50  
51  
52  
53  
54  
55  
56  
57  
58  
59  
60

1  
2  
3  
4  
5  
6  
7  
8  
9  
10  
11  
12  
13  
14  
15  
16  
17  
18  
19  
20  
21  
22  
23  
24  
25  
26  
27  
28  
29  
30  
31  
32  
33  
34  
35  
36  
37  
38  
39  
40  
41  
42  
43  
44  
45  
46  
47  
48  
49  
50  
51  
52  
53  
54  
55  
56  
57  
58  
59  
60

Appendix 2. Boxes 16 to 23

Patient reported scenarios occurring during the past 12 months that PPIs scored as higher likelihood to be a potentially-unsafe preventable-problem in primary care compared with GPs

**Scenario16. GP Surgery**

**Briefly describe the mistake or problem and how it happened.** *"I had a severe reaction to Atorvastatin after a dose increase so much so that I was almost immobile and took 4 months to recover"*

**Could the mistake or problem have been avoided? If so how?** *"According to guidelines I should have been on the increased dose - it took a long time to convince the GP that I needed blood tests to find out why I couldn't walk. My GP was very hesitant to admit that I did have a reaction to statins."*

**Were you able to talk about the mistake or problem with anybody working in the primary care service?**

*"No I could not find anybody with whom I could discuss the mistake or problem. It was not really the GPs fault per se, just took a lot of convincing that there was a problem"*

**Patient-reported prospect of harm:** health could have been made worse had someone not noticed a problem or error

**Patient-perspective problem-type code:** C1.1.3 Long term or continued prescribing without review or consideration of long term or side effects

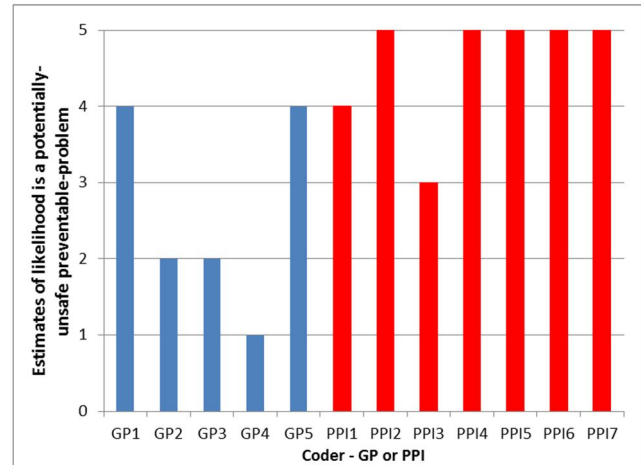

5=very likely or certain, 4=probably, 3=possibly, 2=unlikely, 1=definitely not, 0 = insufficient information or don't know

**Scenario17. GP Surgery**

**Briefly describe the mistake or problem and how it happened.** *“Doctor kept saying I had vitamin deficiency B1, it turned out I had peripheral neuropathy which is very painful”*

**Could the mistake or problem have been avoided? If so how?** *“I just needed the proper medication to help”*

**Were you able to talk about the mistake or problem with anybody working in the primary care service?** *“Just saw another Doctor and she knew straight away what the problem was - she was experienced with Diabetic problems. Yes had the opportunity but did not feel comfortable to discuss the mistake or problem”*

**Patient-reported prospect of harm:** prompted via Q10 (Box 1 main paper)

**Patient-perspective problem-type code:** F1. Wrong/late/missed/delayed diagnosis



5=very likely or certain, 4=probably, 3=possibly, 2=unlikely, 1=definitely not, 0 = insufficient information or don't know

**Scenario18. GP Surgery**

**Briefly describe the mistake or problem and how it happened.** *“Incapable diabetic doctor trying to take blood out the back of my hand haphazardly, not listening and resulting in me fitting and the student watching having to get help.”*

**Could the mistake or problem have been avoided? If so how?** *“Yes. By listening to me”*

**Were you able to talk about the mistake or problem with anybody working in the primary care service?** *“No I could not find anybody with whom I could discuss the mistake or problem”*

**Patient-reported prospect of harm:** prompted via Q10 (Box 1 main paper)

**Patient-perspective problem-type code:** E2.

Procedure was not carried out correctly; D1. Clinician seemed to lack interest in the patient's health problem or did not listen carefully enough

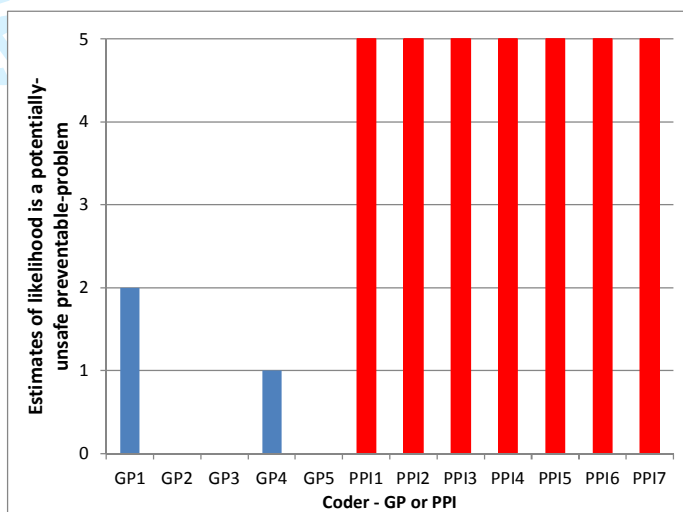

5=very likely or certain, 4=probably, 3=possibly, 2=unlikely, 1=definitely not, 0 = insufficient information or don't know

**Scenario19. Dental Surgery**

**Briefly describe the mistake or problem and how it happened.** *“I had an infection under my wisdom tooth. They agreed that the only way to solve the problem was to take the tooth out. They gave me an appointment to do this in 6 weeks. I am a type 1 diabetic and the infection was affecting my blood sugars and I was concerned that I would have to go to A&E if my blood sugars continued to rise due to the infection. It would have affected my health if I had not paid to go to a private dentist.”*

**Could the mistake or problem have been avoided? If so how?** *“They could have taken out the tooth straight away. I was happy to wait at the emergency dentist for them to do this.”*

**Were you able to talk about the mistake or problem with anybody working in the primary care service?** *“I explained but they said I would have to wait. They also asked if I needed a sugary drink when I said that my sugars were high so I was too scared to eat and had not eaten in 12hrs. It was clear they didn't understand diabetes.”*

**Patient-reported prospect of harm:** health could have been made worse had someone not noticed a problem or error

**Patient-perspective problem-type code:** A5. Unable to get an appointment/other problems with making appointment

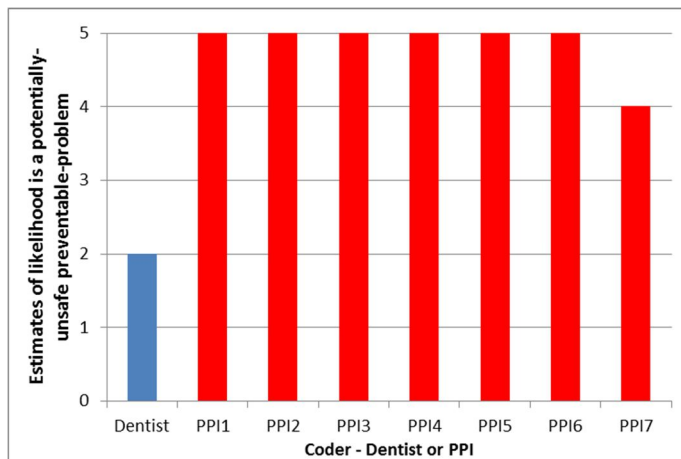

5=very likely or certain, 4=probably, 3=possibly, 2=unlikely, 1=definitely not, 0 = insufficient information or don't know

**Scenario20. Dental Surgery**

**Briefly describe the mistake or problem and how it happened.** *“Caries, cavities and problem with crown not diagnosed or treated”*

**Could the mistake or problem have been avoided? If so how?** *“Better dentist & not working to tight time-scale imposed by company owning dental surgery”*

**Were you able to talk about the mistake or problem with anybody working in the primary care service?** *“No I could not find anybody with whom I could discuss the mistake or problem”*

**Patient-reported prospect of harm:** prompted via Q10 (Box 1 main paper)

**Patient-perspective problem-type code:** C3. Problem with dental treatment or diagnosis

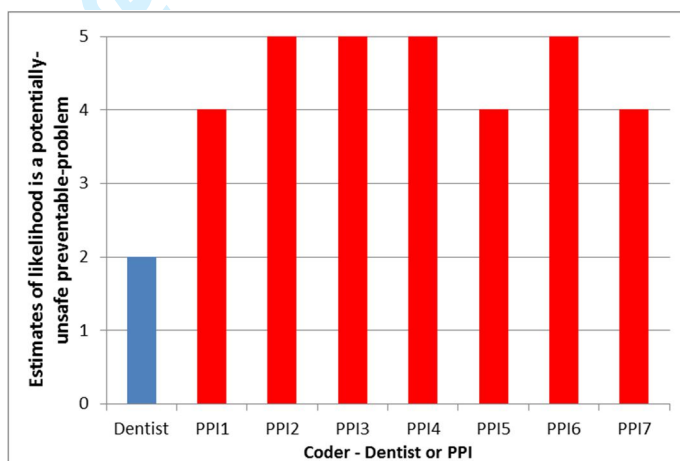

5=very likely or certain, 4=probably, 3=possibly, 2=unlikely, 1=definitely not, 0 = insufficient information or don't know

**Scenario21. GP Surgery**

**Briefly describe the mistake or problem and how it happened.** *“Using the summary on discharge from hospital, one GP transcribed incorrectly on to my electronic notes ie size of ovarian cyst was 7.5cms and he put 7.5 mms. Another GP requested diagnostic bone density scan but either forgot or did not record it and she ended up questioning why I had it and who requested it. She also referred me for an orthopedic consultation then said I was not funded for the steroid injection put into my swollen elbows.”*



**Could the mistake or problem have been avoided? If so how?** *“Yes”*

5=very likely or certain, 4=probably, 3=possibly, 2=unlikely, 1=definitely not, 0 = insufficient information or don't know

**Were you able to talk about the mistake or problem with anybody working in the primary care service?** *“I was too scared to discuss my concerns for fear of being labelled a trouble maker”*

**Patient-reported prospect of harm:** health could have been made worse had someone not noticed a problem or error

**Patient-perspective problem-type code:** A2. Incorrect notes/inadequate notes/notes not kept up to date

**Scenario22. GP Surgery**

**Briefly describe the mistake or problem and how it happened.** *“GP prescribed pills, but then got phone call saying not to take them”*

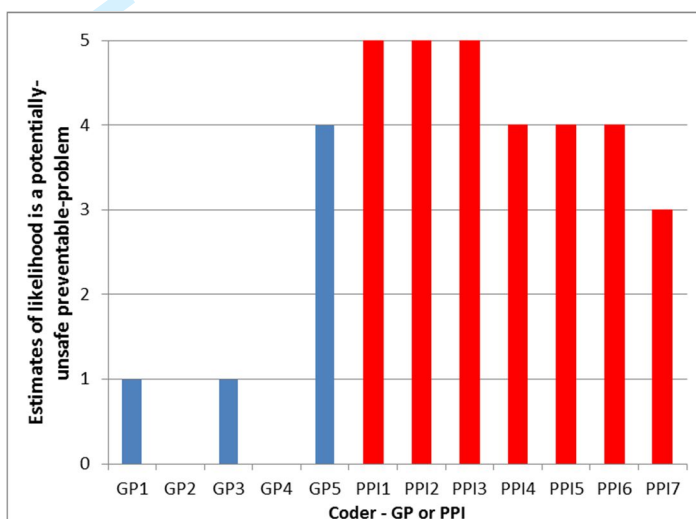

**Could the mistake or problem have been avoided? If so how?** *“Not sure”*

5=very likely or certain, 4=probably, 3=possibly, 2=unlikely, 1=definitely not, 0 = insufficient information or don't know

**Were you able to talk about the mistake or problem with anybody working in the primary care service?** *“No I was not concerned about the problem”*

**Patient-reported prospect of harm:** prompted via Q10 (Box 1 main paper)

**Patient-perspective problem-type code:** C1. Medication problem



**Scenario23. GP Surgery**

**Briefly describe the mistake or problem and how it happened.** *"I had a burst appendix and peritonitis, something that even a scan couldn't detect adequately. My first visit to GP was when I said I think I have appendicitis, no other symptoms only the pain. It was ten days before seeing a consultant, a further 10 days to have a scan, then 2 weeks to be told that I had a lump on my colon which is what my GP had said 5 weeks previously. It was a further 2 weeks before I had surgery."*

**Could the mistake or problem have been avoided? If so how?** *"If my GP had referred me for a scan immediately it would have saved 3 weeks out of the seven. It was two weeks from scan to results and I hear that is usual, but they're not looking at them for 2 weeks"*

**Were you able to talk about the mistake or problem with anybody working in the primary care service?** *"Had the outcome been different my widow might have pursued the matter further. The system is at fault rather than any individual."*

**Patient-reported prospect of harm:** your health has been made worse by a problem or error that could have been prevented

**Patient-perspective problem-type code:** B5. Not referred when patient felt was needed



5=very likely or certain, 4=probably, 3=possibly, 2=unlikely, 1=definitely not, 0 = insufficient information or don't know

STROBE Statement—Checklist of items that should be included in reports of *cross-sectional studies*

|                              | Item No | Recommendation                                                                                                                                                                                                                                                                                                                                                                                                                                                                                         |
|------------------------------|---------|--------------------------------------------------------------------------------------------------------------------------------------------------------------------------------------------------------------------------------------------------------------------------------------------------------------------------------------------------------------------------------------------------------------------------------------------------------------------------------------------------------|
| <b>Title and abstract</b>    | 1       | (a) Indicate the study's design with a commonly used term in the title or the abstract<br>Yes p1                                                                                                                                                                                                                                                                                                                                                                                                       |
|                              |         | (b) Provide in the abstract an informative and balanced summary of what was done and what was found yes p2                                                                                                                                                                                                                                                                                                                                                                                             |
| <b>Introduction</b>          |         |                                                                                                                                                                                                                                                                                                                                                                                                                                                                                                        |
| Background/rationale         | 2       | Explain the scientific background and rationale for the investigation being reported<br>Yes p3                                                                                                                                                                                                                                                                                                                                                                                                         |
| Objectives                   | 3       | State specific objectives, including any prespecified hypotheses yes p3-4                                                                                                                                                                                                                                                                                                                                                                                                                              |
| <b>Methods</b>               |         |                                                                                                                                                                                                                                                                                                                                                                                                                                                                                                        |
| Study design                 | 4       | Present key elements of study design early in the paper yes p4                                                                                                                                                                                                                                                                                                                                                                                                                                         |
| Setting                      | 5       | Describe the setting, locations, and relevant dates, including periods of recruitment, exposure, follow-up, and data collection yes p4                                                                                                                                                                                                                                                                                                                                                                 |
| Participants                 | 6       | (a) Give the eligibility criteria, and the sources and methods of selection of participants yes p4                                                                                                                                                                                                                                                                                                                                                                                                     |
| Variables                    | 7       | Clearly define all outcomes, exposures, predictors, potential confounders, and effect modifiers. Give diagnostic criteria, if applicable yes box 1, online appendix 1                                                                                                                                                                                                                                                                                                                                  |
| Data sources/<br>measurement | 8*      | For each variable of interest, give sources of data and details of methods of assessment (measurement). Describe comparability of assessment methods if there is more than one group yes p5, online appendix 1                                                                                                                                                                                                                                                                                         |
| Bias                         | 9       | Describe any efforts to address potential sources of bias yes p4                                                                                                                                                                                                                                                                                                                                                                                                                                       |
| Study size                   | 10      | Explain how the study size was arrived at n/a as is a pilot study.                                                                                                                                                                                                                                                                                                                                                                                                                                     |
| Quantitative variables       | 11      | Explain how quantitative variables were handled in the analyses. If applicable, describe which groupings were chosen and why yes p5, table2                                                                                                                                                                                                                                                                                                                                                            |
| Statistical methods          | 12      | (a) Describe all statistical methods, including those used to control for confounding yes p5<br>(b) Describe any methods used to examine subgroups and interactions, yes just chi2 tests p5<br>(c) Explain how missing data were addressed all missing data is listed in the tables so it is completely transparent how this was dealt with, there were few missing data<br>(d) If applicable, describe analytical methods taking account of sampling n/a<br>(e) Describe any sensitivity analyses n/a |
| <b>Results</b>               |         |                                                                                                                                                                                                                                                                                                                                                                                                                                                                                                        |
| Participants                 | 13*     | (a) Report numbers of individuals at each stage of study—eg numbers potentially eligible, examined for eligibility, confirmed eligible, included in the study, completing follow-up, and analysed yes online appendix 1<br>(b) Give reasons for non-participation at each stage yes online appendix 1<br>(c) Consider use of a flow diagram yes online appendix 1                                                                                                                                      |
| Descriptive data             | 14*     | (a) Give characteristics of study participants (eg demographic, clinical, social) and information on exposures and potential confounders yes table 1<br>(b) Indicate number of participants with missing data for each variable of interest yes all tables                                                                                                                                                                                                                                             |
| Outcome data                 | 15*     | Report numbers of outcome events or summary measures yes all tables                                                                                                                                                                                                                                                                                                                                                                                                                                    |
| Main results                 | 16      | (a) Give unadjusted estimates and, if applicable, confounder-adjusted estimates and their precision (eg, 95% confidence interval). Make clear which confounders were                                                                                                                                                                                                                                                                                                                                   |

|                          |    |                                                                                                                                                                                            |
|--------------------------|----|--------------------------------------------------------------------------------------------------------------------------------------------------------------------------------------------|
|                          |    | adjusted for and why they were included <b>yes table 3</b>                                                                                                                                 |
|                          |    | (b) Report category boundaries when continuous variables were categorized <b>yes all tables</b>                                                                                            |
|                          |    | (c) If relevant, consider translating estimates of relative risk into absolute risk for a meaningful time period <b>not appropriate as pilot study with self-selected sample</b>           |
| Other analyses           | 17 | Report other analyses done—eg analyses of subgroups and interactions, and sensitivity analyses <b>table 6 considers demographics for problems more likely to be a potentially harmful.</b> |
| <b>Discussion</b>        |    |                                                                                                                                                                                            |
| Key results              | 18 | Summarise key results with reference to study objectives <b>yes p7</b>                                                                                                                     |
| Limitations              | 19 | Discuss limitations of the study, taking into account sources of potential bias or imprecision. Discuss both direction and magnitude of any potential bias <b>yes p8</b>                   |
| Interpretation           | 20 | Give a cautious overall interpretation of results considering objectives, limitations, multiplicity of analyses, results from similar studies, and other relevant evidence <b>yes p7-8</b> |
| Generalisability         | 21 | Discuss the generalisability (external validity) of the study results <b>yes p8, not generalisable</b>                                                                                     |
| <b>Other information</b> |    |                                                                                                                                                                                            |
| Funding                  | 22 | Give the source of funding and the role of the funders for the present study and, if applicable, for the original study on which the present article is based <b>yes p9</b>                |

\*Give information separately for exposed and unexposed groups.

**Note:** An Explanation and Elaboration article discusses each checklist item and gives methodological background and published examples of transparent reporting. The STROBE checklist is best used in conjunction with this article (freely available on the Web sites of PLoS Medicine at <http://www.plosmedicine.org/>, Annals of Internal Medicine at <http://www.annals.org/>, and Epidemiology at <http://www.epidem.com/>). Information on the STROBE Initiative is available at [www.strobe-statement.org](http://www.strobe-statement.org).
